# Supplementary material for: Acid-catalyzed cleavage of C–C bonds enables atropaldehyde acetals as masked C2 electrophiles for organic synthesis
Source: Royal Society of Chemistry journal article supplement (doi:10.1039/d1cc04000f), 2021-01-01

## Supporting Information

### Acid-Catalyzed Cleavage of C–C Bond Enabled Atropaldehyde Acetals as Masked C2 Electrophiles for Organic Synthesis

Shaomin Chen,<sup>a</sup> Minghao Li,<sup>a\*</sup> and Yanlong Gu<sup>a,b,c\*</sup>

<sup>a</sup> Key Laboratory for Large-Format Battery Materials and System, Ministry of Education, School of Chemistry and Chemical Engineering, Huazhong University of Science and Technology, 430074, Wuhan, China.

<sup>b</sup> School of Chemistry and Chemical Engineering, The Key Laboratory for Green Processing of Chemical Engineering of Xinjiang Bingtuan, Shihezi University, Shihezi City 832004, China.

<sup>c</sup> State Key Laboratory for Oxo Synthesis and Selective Oxidation, Lanzhou Institute of Chemical Physics, 730000, Lanzhou, China.

Corresponding authors: M. Li (liminghaochem@hust.edu.cn) and Y. Gu (klgy1@hust.edu.cn)

#### Table of contents

|                                                                                    |    |
|------------------------------------------------------------------------------------|----|
| <b>1. General information</b> .....                                                | 2  |
| <b>2. Preparation of substrates</b> .....                                          | 2  |
| <b>3. Optimization of the reaction conditions</b> .....                            | 4  |
| <b>4. General procedure</b> .....                                                  | 6  |
| <b>5. Sluggish reactions of other nucleophiles with atropaldehyde acetal</b> ..... | 7  |
| <b>6. Mechanism study</b> .....                                                    | 9  |
| <b>7. X-ray crystallographic data</b> .....                                        | 14 |
| <b>8. Characterization data of products</b> .....                                  | 16 |
| <b>9. References</b> .....                                                         | 27 |
| <b>10. Copies of NMR spectra</b> .....                                             | 28 |

## 1. General information

Unless otherwise noted, all reagents were purchased from commercial suppliers and used without further purification. The reactions were monitored by TLC with Haiyang GF-254 silica gel plates (Qingdao Haiyang chemical industry Co. Ltd, Qingdao, China) using UV light or  $\text{KMnO}_4$  as visualizing agents as needed. Flash column chromatography was performed using 200-300 mesh silica gel at increased pressure.  $^1\text{H}$  NMR spectra and  $^{13}\text{C}$  NMR spectra were respectively recorded on Brüker AV-400 spectrometers. Chemical shifts ( $\delta$ ) were expressed in ppm relative to  $\text{Me}_4\text{Si}$  in  $\text{CDCl}_3$ , and coupling constants ( $J$ ) were reported in Hz. High-resolution mass spectra (HRMS) were obtained on Brüker Compass Data Analysis 4.0. IR spectra were recorded on a Bruker FT-IR (EQUINOX 55) using KBr pellets or neat liquid technology.

## 2. Preparation of Substrates

### 2.1 Preparation of 2-arylidole (**1b–1s**)

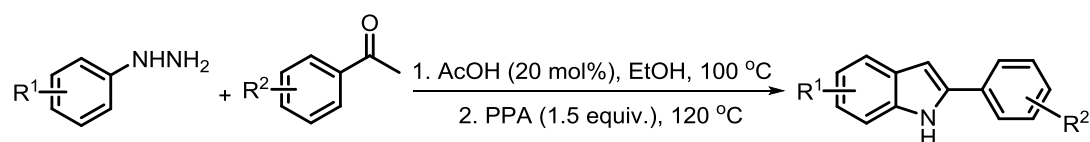

According to literature reports,<sup>1</sup> 2-arylidole (**1b–1s**) was synthesized by the methods below:

A mixture of acetophenone (10 mmol), phenylhydrazine (1.2 equiv), HOAc (2 mmol) and EtOH (6.0 mL) were taken in a 100 mL round bottom flask. Then, the reaction mixture was refluxed at 100 °C. When the reaction was completed (detected by TLC), it was cooled to room temperature. The EtOH was evaporated in vacuo to give the crude phenylhydrazone product. Next, the freshly prepared phenylhydrazone (10 mmol) were taken in a 100 mL round bottom flask and 1.5 equiv. of polyphosphoric acid was added at one time and the solution was refluxed. After completion, the reaction mixture was cooled to room temperature, quenched with cold  $\text{H}_2\text{O}$  (10 mL) and extracted with EtOAc ( $3 \times 10\text{mL}$ ). The combined organic layers were dried over anhydrous  $\text{Na}_2\text{SO}_4$  and then evaporated in vacuo. The residue was purified by silica gel column chromatography using PE/ EtOAc as eluent to afford the corresponding 2-arylidole.

### 2.2 Preparation of 2-phenylpropenal diethyl acetal (**2a**)

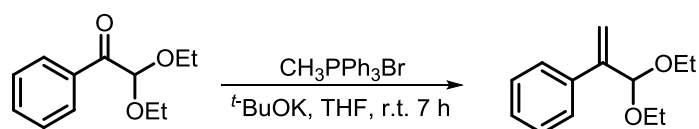

According to literature reports,<sup>2</sup> 2-phenylpropenal diethyl acetal (**2a**) was synthesized by the methods below:

A suspension of 8.57 g (24 mmol) of methyltriphenylphosphonium bromide and 2.69 g (24 mmol) of potassium *t*-butoxide in 35 mL of dried THF was stirred at room temperature for 30 min. Subsequently, 4.16 g (20 mmol) of 2,2-diethoxyacetophenone was added, and the reaction mixture was stirred at room temperature for 7 h. The reaction mixture was then filtered through a pad of Celite and the filtrate was concentrated on a rotary evaporator and then purified by silica gel column chromatography (PE/EtOAc = 20/1) to give the pure product.

### 2.3 Preparation of substituted atropaldehyde diethyl acetal (**2b–2h**)

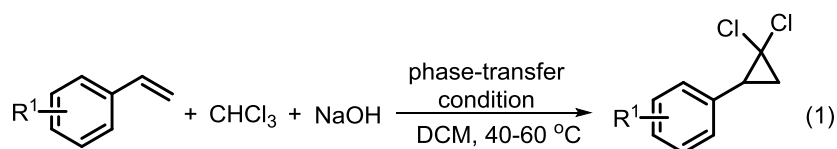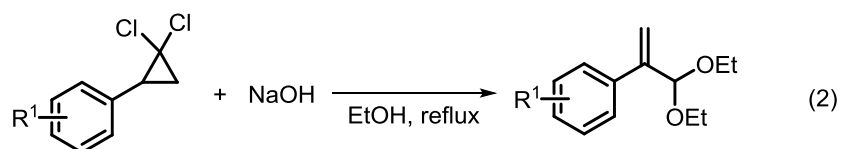

According to literature reports,<sup>3</sup> the substituted atropaldehyde diethyl acetals (**2b–2h**) were synthesized by the two-step methods below:

**Step 1:** the synthesis of 1,1-dichloro-2-phenylcyclopropane.

In a 100 mL, three-necked, round-bottomed flask equipped with a thermometer and a reflux condenser were charged with 50 mmol of substituted styrene, 5 mL of chloroform, 0.2 g of triethylbenzylammonium chloride, 2.5 mL of methylene chloride, and a solution of 8 g of NaOH in 8 mL of water. The mixture was stirred vigorously. The temperature was allowed to rise to 40 °C and then kept between 40 and 45 °C by cooling with water. After about an hour, evolution of heat subsided, and the dark reaction mixture was heated to 55–60 °C for an additional hour. The products were transferred to a separatory funnel with 25 mL of water. The organic layer was separated and the aqueous phase extracted with petroleum ether. The organic fractions were combined, dried over anhydrous Na<sub>2</sub>SO<sub>4</sub>, filtered, concentrated in vacuo, and distilled through a Vigreux column.

**Step 2:** the synthesis of atropaldehyde diethyl acetal.

A mixture of 10 mmol of 1,1-dichloro-2-aryl cyclopropane, 1.6 g (40 mmol) of NaOH, and 16

mL of ethanol was placed in a flask fitted with a reflux condenser. The mixture was heated under reflux for 24 h. Some bumping might occur. Water (20 mL) was added, and the mixture was extracted with petroleum ether. The extracts were combined, dried over anhydrous Na<sub>2</sub>SO<sub>4</sub>, concentrated in vacuo, and distilled through a Vigreux column to give the corresponding substituted atropaldehyde diethyl acetal.

### 3. Optimization of the reaction conditions

**Table S1.** Optimization of the reaction of **1a** and **2a** for the synthesis of **3a**.<sup>a</sup>

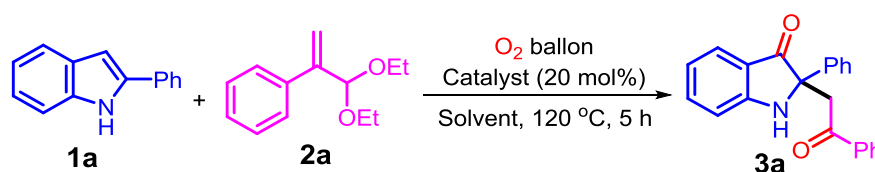

| Entry           | Catalyst                           | Oxidant                                      | Solvent | Yield (%) <sup>b</sup> |
|-----------------|------------------------------------|----------------------------------------------|---------|------------------------|
| 1               | —                                  | O <sub>2</sub>                               | DMSO    | NR                     |
| 2               | Sc(OTf) <sub>3</sub>               | O <sub>2</sub>                               | DMSO    | Trace                  |
| 3               | Fe(OTf) <sub>3</sub>               | O <sub>2</sub>                               | DMSO    | ND                     |
| 4               | Cu(OTf) <sub>2</sub>               | O <sub>2</sub>                               | DMSO    | 31                     |
| 5               | CuCl <sub>2</sub>                  | O <sub>2</sub>                               | DMSO    | 28                     |
| 6               | Al(OTf) <sub>3</sub>               | O <sub>2</sub>                               | DMSO    | 58                     |
| 7               | AlCl <sub>3</sub>                  | O <sub>2</sub>                               | DMSO    | 37                     |
| 8               | BF <sub>3</sub> ·Et <sub>2</sub> O | O <sub>2</sub>                               | DMSO    | 70                     |
| 9               | PTSA                               | O <sub>2</sub>                               | DMSO    | 13                     |
| 10 <sup>c</sup> | BF <sub>3</sub> ·Et <sub>2</sub> O | TBHP                                         | DMSO    | 41                     |
| 11 <sup>c</sup> | BF <sub>3</sub> ·Et <sub>2</sub> O | DTBP                                         | DMSO    | 57                     |
| 12 <sup>c</sup> | BF <sub>3</sub> ·Et <sub>2</sub> O | K <sub>2</sub> S <sub>2</sub> O <sub>8</sub> | DMSO    | 34                     |
| 13              | BF <sub>3</sub> ·Et <sub>2</sub> O | —                                            | DMSO    | 43, (29) <sup>d</sup>  |
| 14              | BF <sub>3</sub> ·Et <sub>2</sub> O | O <sub>2</sub>                               | DMF     | 36                     |
| 15              | BF <sub>3</sub> ·Et <sub>2</sub> O | O <sub>2</sub>                               | Toluene | 39                     |
| 16              | BF <sub>3</sub> ·Et <sub>2</sub> O | O <sub>2</sub>                               | PhCl    | Messy                  |
| 17              | BF <sub>3</sub> ·Et <sub>2</sub> O | O <sub>2</sub>                               | DMSO    | (54, 30) <sup>e</sup>  |
| 18              | BF <sub>3</sub> ·Et <sub>2</sub> O | O <sub>2</sub>                               | DMSO    | (39, 26) <sup>f</sup>  |

<sup>a</sup> Unless otherwise noted, all reactions were performed with **1a** (0.2 mmol), **2a** (0.2 mmol), catalyst (20 mol%), solvent (1 mL) at 120 °C under oxygen for 5 h. <sup>b</sup> Isolated yield; <sup>c</sup> Oxidant (1.2 equiv.). <sup>d</sup> Under nitrogen. <sup>e</sup> Performing the reaction at 100 °C and 140 °C. <sup>f</sup> Yields are with respect to the additives of ethanol and glycol (2.0 equiv.). TBHP = *tert*-Butyl hydroperoxide. DTBP = Di-*tert*-butyl peroxide.

**Table S2.** Optimization of the reaction of **2a** and β-naphthol for the synthesis of **5a**.<sup>a</sup>

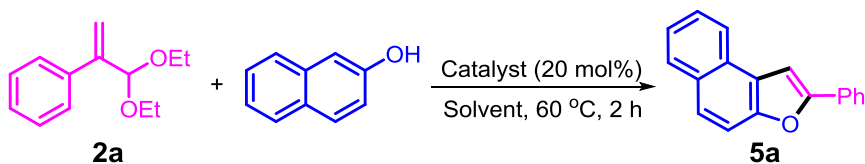

| Entry           | Catalyst                           | Solvent            | Yield (%) <sup>b</sup> |
|-----------------|------------------------------------|--------------------|------------------------|
| 1               | Sc(OTf) <sub>3</sub>               | EtOH               | 26                     |
| 2               | Al(OTf) <sub>3</sub>               | EtOH               | 76                     |
| 3               | AlCl <sub>3</sub>                  | EtOH               | 22                     |
| 4               | BiCl <sub>3</sub>                  | EtOH               | ND                     |
| 5               | BF <sub>3</sub> ·Et <sub>2</sub> O | EtOH               | 8                      |
| 6               | PTSA                               | EtOH               | ND                     |
| 7               | TFA                                | EtOH               | 18                     |
| 8               | Al(OTf) <sub>3</sub>               | CH <sub>3</sub> CN | ND                     |
| 9               | Al(OTf) <sub>3</sub>               | 1,4-Dioxane        | 39                     |
| 10              | Al(OTf) <sub>3</sub>               | DCE                | 24                     |
| 11              | Al(OTf) <sub>3</sub>               | IPA                | 68                     |
| 12 <sup>c</sup> | Al(OTf) <sub>3</sub>               | EtOH               | 43                     |
| 13              | Al(OTf) <sub>3</sub>               | EtOH               | (36, 79) <sup>d</sup>  |

<sup>a</sup> Unless otherwise noted, all reactions were performed with **2a** (0.2 mmol), β-naphthol (0.3 mmol), catalyst (20 mol%), solvent (1 mL) at 60 °C under air condition for 2 h. <sup>b</sup> Isolated yield based on **2a**. <sup>c</sup> Performing the reaction at 80 °C. <sup>d</sup> Performing the reaction under nitrogen and oxygen atmosphere, respectively. IPA = Isopropyl alcohol. ND = No desired product.

**Table S3.** Optimization of the reaction of **2a** and **6a** for the synthesis of **7a**.<sup>a</sup>

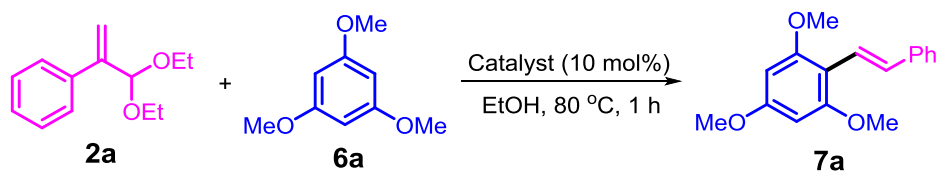

| Entry           | Catalyst                           | Solvent            | Yield (%) <sup>b</sup> |
|-----------------|------------------------------------|--------------------|------------------------|
| 1               | Sc(OTf) <sub>3</sub>               | EtOH               | 22                     |
| 2               | Fe(OTf) <sub>3</sub>               | EtOH               | Trace                  |
| 3               | Al(OTf) <sub>3</sub>               | EtOH               | 15                     |
| 4               | Bi(OTf) <sub>3</sub>               | EtOH               | 12                     |
| 5               | Cu(OTf) <sub>2</sub>               | EtOH               | 18                     |
| 6               | AlCl <sub>3</sub>                  | EtOH               | 37                     |
| 7               | BF <sub>3</sub> ·Et <sub>2</sub> O | EtOH               | 31                     |
| 8               | PTSA                               | EtOH               | 11                     |
| 9               | ZnBr <sub>2</sub>                  | EtOH               | NR                     |
| 10 <sup>c</sup> | AlCl <sub>3</sub>                  | EtOH               | 54                     |
| 11 <sup>c</sup> | AlCl <sub>3</sub>                  | CH <sub>3</sub> CN | Trace                  |

|                   |                   |             |                       |
|-------------------|-------------------|-------------|-----------------------|
| 12 <sup>c</sup>   | AlCl <sub>3</sub> | 1,4-Dioxane | Trace                 |
| 13 <sup>c</sup>   | AlCl <sub>3</sub> | DMSO        | ND                    |
| 14 <sup>c</sup>   | AlCl <sub>3</sub> | Toluene     | 23                    |
| 15 <sup>c,d</sup> | AlCl <sub>3</sub> | EtOH        | 72                    |
| 16 <sup>c,d</sup> | TFA               | Toluene     | (69, 65) <sup>e</sup> |

<sup>a</sup> Unless otherwise noted, all reactions were performed with **2a** (0.2 mmol), **5a** (0.3 mmol), catalyst (10 mol%), solvent (1 mL) at 80 °C under air condition for 1 h. <sup>b</sup> Isolated yield based on **2a**. <sup>c</sup> AlCl<sub>3</sub> (0.04 mol, 20 mol%). <sup>d</sup> **5a**, 0.4 mmol. <sup>e</sup> Performing the reaction under nitrogen and oxygen atmosphere, respectively. ND = No desired product.

## 4. General procedure

### 4.1 General procedure for the synthesis of 2,2-disubstituted indolin-3-ones

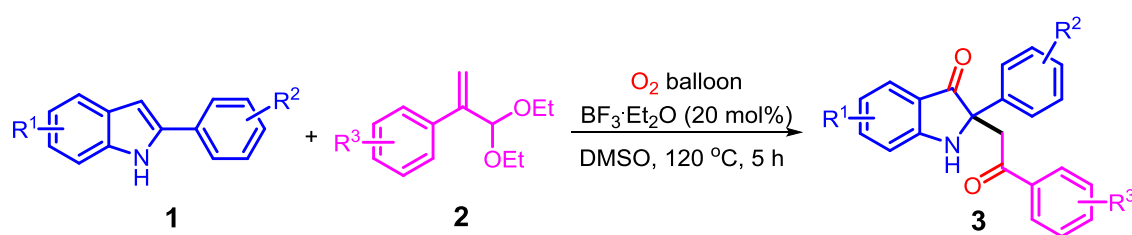

The reactions were conducted in a 10 mL of V-type flask equipped with oil bath and triangle magnetic stirring. The mixture of **1** (0.2 mmol), **2** (0.2 mmol) and BF<sub>3</sub>·Et<sub>2</sub>O (0.04 mmol, 20 mol%) charged with an O<sub>2</sub> balloon in DMSO (1.0 mL) was stirred at 120 °C for 5 h. After the completion of the reaction, the mixture cooled to room temperature, and the resulting mixture was washed with saturated NaHCO<sub>3</sub> solution, extracted with ethyl acetate, dried over anhydrous sodium sulfate, and then concentrated by removing the solvent under vacuum. Finally, the residue was purified by silica gel column chromatography using PE/EtOAc as eluent to afford the desired product.

### 4.2 General procedure for the synthesis of naphthofurans

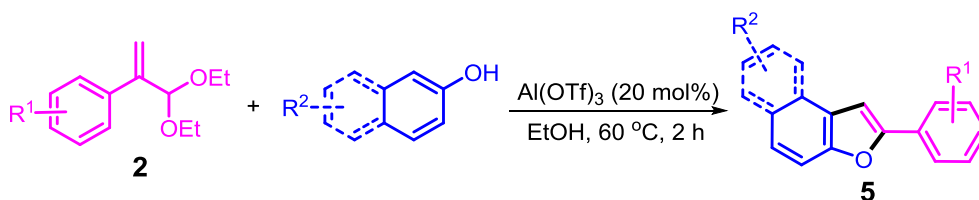

The reactions were conducted in a 10 mL of V-type flask equipped with oil bath and triangle magnetic stirring. The mixture of **2** (0.2 mmol), β-naphthol (0.3 mmol) and Al(OTf)<sub>3</sub> (0.04 mmol, 20 mol%) in EtOH (1.0 mL) was stirred at 60 °C for 2 h. After the completion of the reaction, the mixture cooled to room temperature, and the resulting mixture was washed with saturated

NaHCO<sub>3</sub> solution, extracted with ethyl acetate, dried over anhydrous sodium sulfate, and then concentrated by removing the solvent under vacuum. Finally, the residue was purified by silica gel column chromatography using PE as eluent to afford the desired product.

### 4.3 General procedure for the synthesis of stilbenes

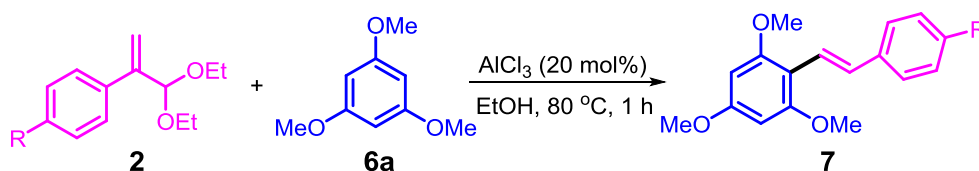

The reactions were conducted in a 10 mL of V-type flask equipped with oil bath and triangle magnetic stirring. The mixture of **2** (0.2 mmol), **5a** (0.4 mmol) and AlCl<sub>3</sub> (0.04 mmol, 20 mol%) in EtOH (1.0 mL) was stirred at 80 °C for 1 h. After the completion of the reaction, the mixture cooled to room temperature, and the resulting mixture was washed with saturated NaHCO<sub>3</sub> solution, extracted with ethyl acetate, dried over anhydrous sodium sulfate, and then concentrated by removing the solvent under vacuum. Finally, the residue was purified by silica gel column chromatography using PE/EtOAc as eluent to afford the desired product.

## 5 Sluggish reactions of other nucleophiles with atropaldehyde acetal

**Table S4.** Optimization of the reaction of **2a** and *N*-methyl pyrrole for the synthesis of **8a**.<sup>a</sup>

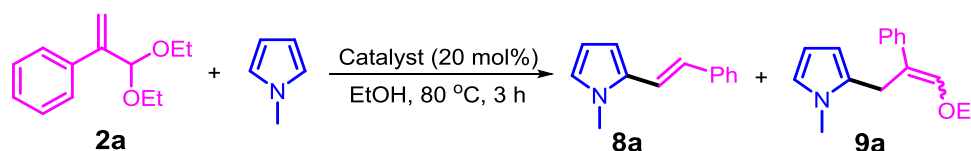

| Entry | Catalyst                           | Yield (%) <sup>b</sup> |
|-------|------------------------------------|------------------------|
| 1     | Sc(OTf) <sub>3</sub>               | Messy                  |
| 2     | Al(OTf) <sub>3</sub>               | Messy                  |
| 3     | Fe(OTf) <sub>3</sub>               | Messy                  |
| 4     | AlCl <sub>3</sub>                  | 23 ( <b>9a</b> )       |
| 5     | BiCl <sub>3</sub>                  | ND                     |
| 6     | BF <sub>3</sub> ·Et <sub>2</sub> O | 34 ( <b>9a</b> )       |
| 7     | PTSA                               | Trace                  |
| 8     | TFA                                | Trace                  |

<sup>a</sup> Unless otherwise noted, all reactions were performed with **2a** (0.2 mmol), *N*-methyl pyrrole (0.4 mmol), catalyst (20 mol%), solvent (1 mL) at 80 °C under air condition for 3 h. <sup>b</sup> Isolated yield based on **2a**. ND = No desired product.

**Table S5.** Optimization of the reaction of **2a** and benzofuran for the synthesis of **10a**.<sup>a</sup>

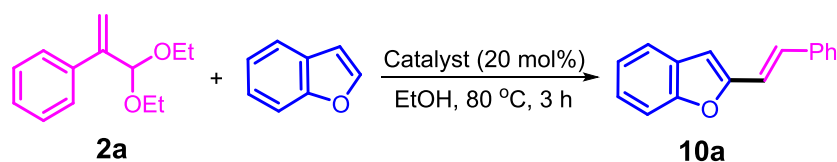

| Entry | Catalyst                           | Yield (%) <sup>b</sup> |
|-------|------------------------------------|------------------------|
| 1     | Sc(OTf) <sub>3</sub>               | Trace                  |
| 2     | Al(OTf) <sub>3</sub>               | Trace                  |
| 3     | Ni(OTf) <sub>2</sub>               | Trace                  |
| 4     | AlCl <sub>3</sub>                  | NR                     |
| 5     | BiCl <sub>3</sub>                  | Messy                  |
| 6     | CuCl <sub>2</sub>                  | ND                     |
| 7     | BF <sub>3</sub> ·Et <sub>2</sub> O | Trace                  |
| 8     | PTSA                               | ND                     |
| 9     | TFA                                | Trace                  |

<sup>a</sup> Unless otherwise noted, all reactions were performed with **2a** (0.2 mmol), benzofuran (0.4 mmol), catalyst (20 mol%), solvent (1 mL) at 80 °C under air condition for 3 h. <sup>b</sup> Isolated yield based on **2a**. ND = No desired product.

**Table S6.** Optimization of the reaction of **2a** and *N,N*-dimethylaniline for the synthesis of **11a**.<sup>a</sup>

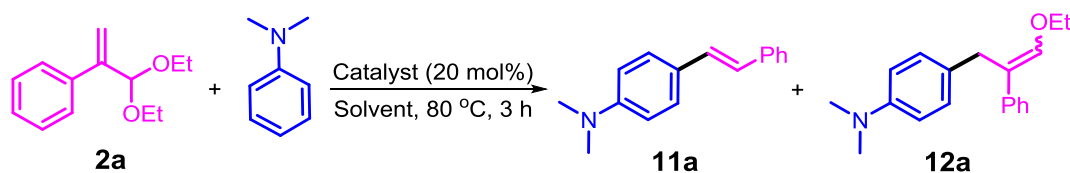

| Entry | Catalyst                           | Solvent     | Yield (%) <sup>b</sup> |
|-------|------------------------------------|-------------|------------------------|
| 1     | Al(OTf) <sub>3</sub>               | EtOH        | Messy                  |
| 2     | Fe(OTf) <sub>3</sub>               | EtOH        | Messy                  |
| 3     | Cu(OTf) <sub>2</sub>               | EtOH        | Messy                  |
| 4     | Bi(OTf) <sub>3</sub>               | EtOH        | 37 ( <b>16a</b> )      |
| 5     | AlCl <sub>3</sub>                  | EtOH        | Messy                  |
| 6     | BF <sub>3</sub> ·Et <sub>2</sub> O | EtOH        | Trace                  |
| 7     | TFA                                | EtOH        | Trace                  |
| 8     | Bi(OTf) <sub>3</sub>               | IPA         | Trace                  |
| 9     | Bi(OTf) <sub>3</sub>               | 1,4-Dioxane | ND                     |
| 10    | Bi(OTf) <sub>3</sub>               | Toluene     | 28 ( <b>16a</b> )      |

<sup>a</sup> Unless otherwise noted, all reactions were performed with **2a** (0.2 mmol), *N,N*-dimethylaniline (0.4 mmol), catalyst (20 mol%), solvent (1 mL) at 80 °C under air condition for 3 h. <sup>b</sup> Isolated yield based on **2a**. ND = No desired product.



## 6 Mechanism study

### 6.1 Control experiments

(1) The synthesis of **4a**

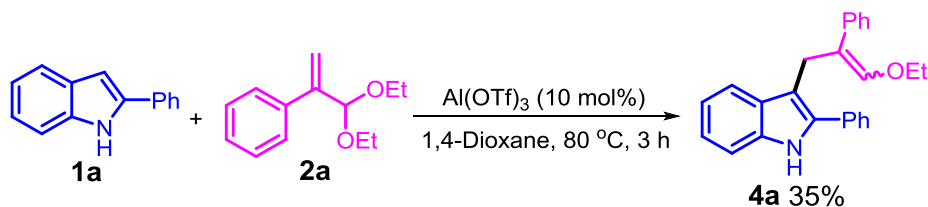

The reactions were conducted in a 10 mL of V-type flask equipped with oil bath and triangle magnetic stirring. The mixture of **1a** (0.2 mmol), **2a** (0.2 mmol) and Al(OTf)<sub>3</sub> (0.02 mmol, 10 mol%) in 1,4-Dioxane (1.0 mL) was stirred at 80 °C for 3 h. After the completion of the reaction, the mixture cooled to room temperature, and the resulting mixture was washed with saturated NaHCO<sub>3</sub> solution, extracted with ethyl acetate, dried over anhydrous sodium sulfate, and then concentrated by removing the solvent under vacuum. Finally, the residue was purified by silica gel column chromatography using PE/EtOAc as eluent to afford the desired product **4a** in 35% yield.

(2) The transformation of **4a** to **3a**

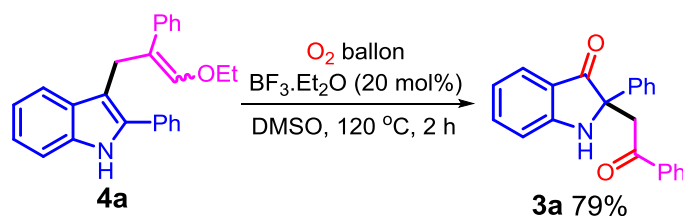

The reactions were conducted in a 10 mL of V-type flask equipped with oil bath and triangle magnetic stirring. The mixture of **4a** (0.2 mmol) and BF<sub>3</sub>·Et<sub>2</sub>O (0.04 mmol, 20 mol%) charged with an O<sub>2</sub> balloon in DMSO (1.0 mL) was stirred at 120 °C for 2 h. After the completion of the reaction, the mixture cooled to room temperature, and the resulting mixture was washed with saturated NaHCO<sub>3</sub> solution, extracted with ethyl acetate, dried over anhydrous sodium sulfate, and then concentrated by removing the solvent under vacuum. Finally, the residue was purified by silica gel column chromatography using PE/EtOAc as eluent to afford the desired product **3a** in 79% yield.

### 6.2 Kinetic analysis based on the conversion of **1a** and yields of **3a** over time

The reactions were conducted in seven 10 mL of V-type flasks equipped with oil bath and triangle magnetic stirring. The mixture of **1a** (0.2 mmol), **2a** (0.2 mmol) and BF<sub>3</sub>·Et<sub>2</sub>O (0.04 mmol, 20

mol%) charged with an O<sub>2</sub> balloon in DMSO (1.0 mL) was stirred at 120 °C in each V-type flask. Each flask was taken out from the oil bath at the certain amount of time intervals. After the completion of the reaction, the mixture cooled to room temperature, and the resulting mixture was isolated by silica gel column chromatography to determine the conversion of 2-phenylindole **1a** and the yield of product **3a**.

| Entry | Time (h) | Conversion (%) | Yield (%) |
|-------|----------|----------------|-----------|
| 1     | 0.5      | 47             | 15        |
| 2     | 1        | 55             | 26        |
| 3     | 1.5      | 67             | 33        |
| 4     | 2        | 81             | 41        |
| 5     | 3        | 97             | 53        |
| 6     | 4        | 97             | 64        |
| 7     | 5        | 97             | 70        |

### 6.3 Competitive experiments

The mixture of **1a** (0.2 mmol), **1** (0.2 mmol), **2a** (0.2 mmol) and BF<sub>3</sub>·Et<sub>2</sub>O (0.04 mmol, 20 mol%) charged with an O<sub>2</sub> balloon in DMSO (1.0 mL) was stirred at 120 °C for 5 h. The product ratio of **3a** and **3** was determined based on the mixture <sup>1</sup>H NMR analyses in CDCl<sub>3</sub>.

(1) <sup>1</sup>H NMR for the reaction of **1a**, **1l** and **2a** in CDCl<sub>3</sub>

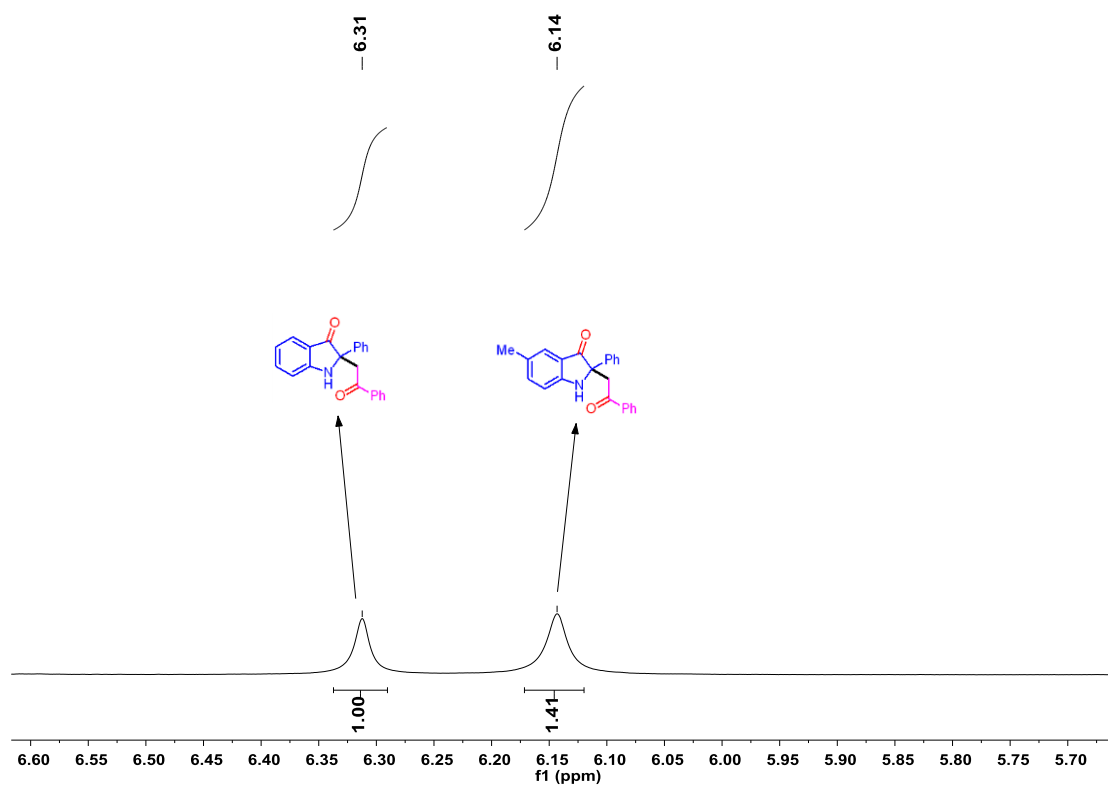

(2)  $^1\text{H}$  NMR for the reaction of **1a**, **1m** and **2a** in  $\text{CDCl}_3$

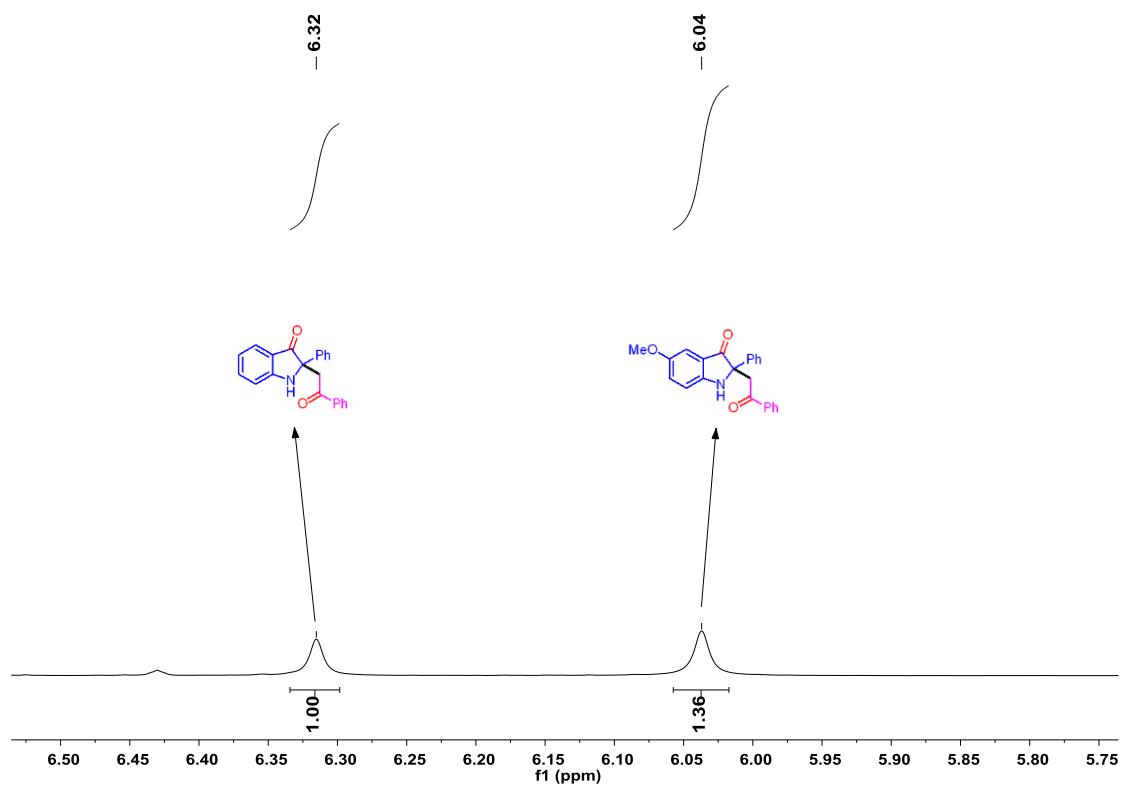

(3)  $^1\text{H}$  NMR for the reaction of **1a**, **1n** and **2a** in  $\text{CDCl}_3$

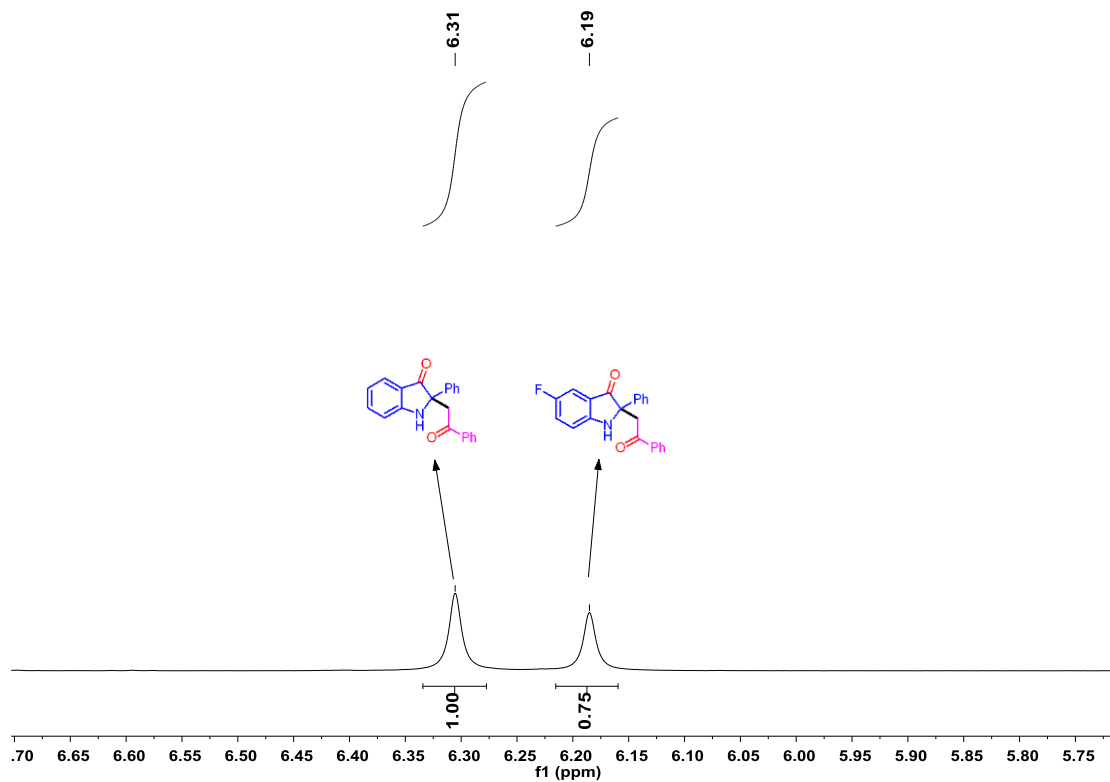

(4)  $^1\text{H}$  NMR for the reaction of **1a**, **1p** and **2a** in  $\text{CDCl}_3$

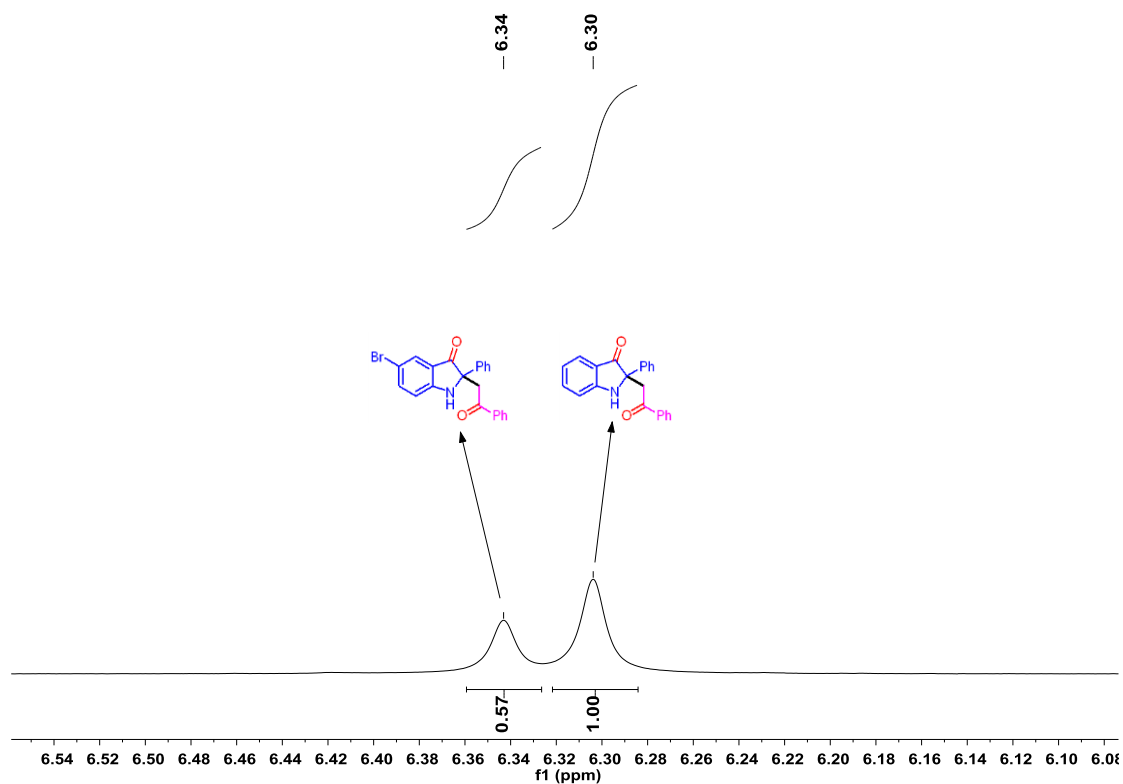

#### 6.4 The key intermediates detected by HRMS for the synthesis of 2,2-disubstituted indolin-3-ones

The reactions were conducted in a 10 mL of V-type flask equipped with oil bath and triangle magnetic stirring. The mixture of **1a** (0.2 mmol), **2a** (0.2 mmol) and BF<sub>3</sub>·Et<sub>2</sub>O (0.04 mmol, 20 mol%) charged with an O<sub>2</sub> balloon in DMSO (1.0 mL) was stirred at 120 °C for 3 h. After the completion of the reaction, the mixture cooled to room temperature, and the resulting mixture was extracted with ethyl acetate, washed with water, and then the crude mixture was detected by HRMS.

## Generic Display Report (all)

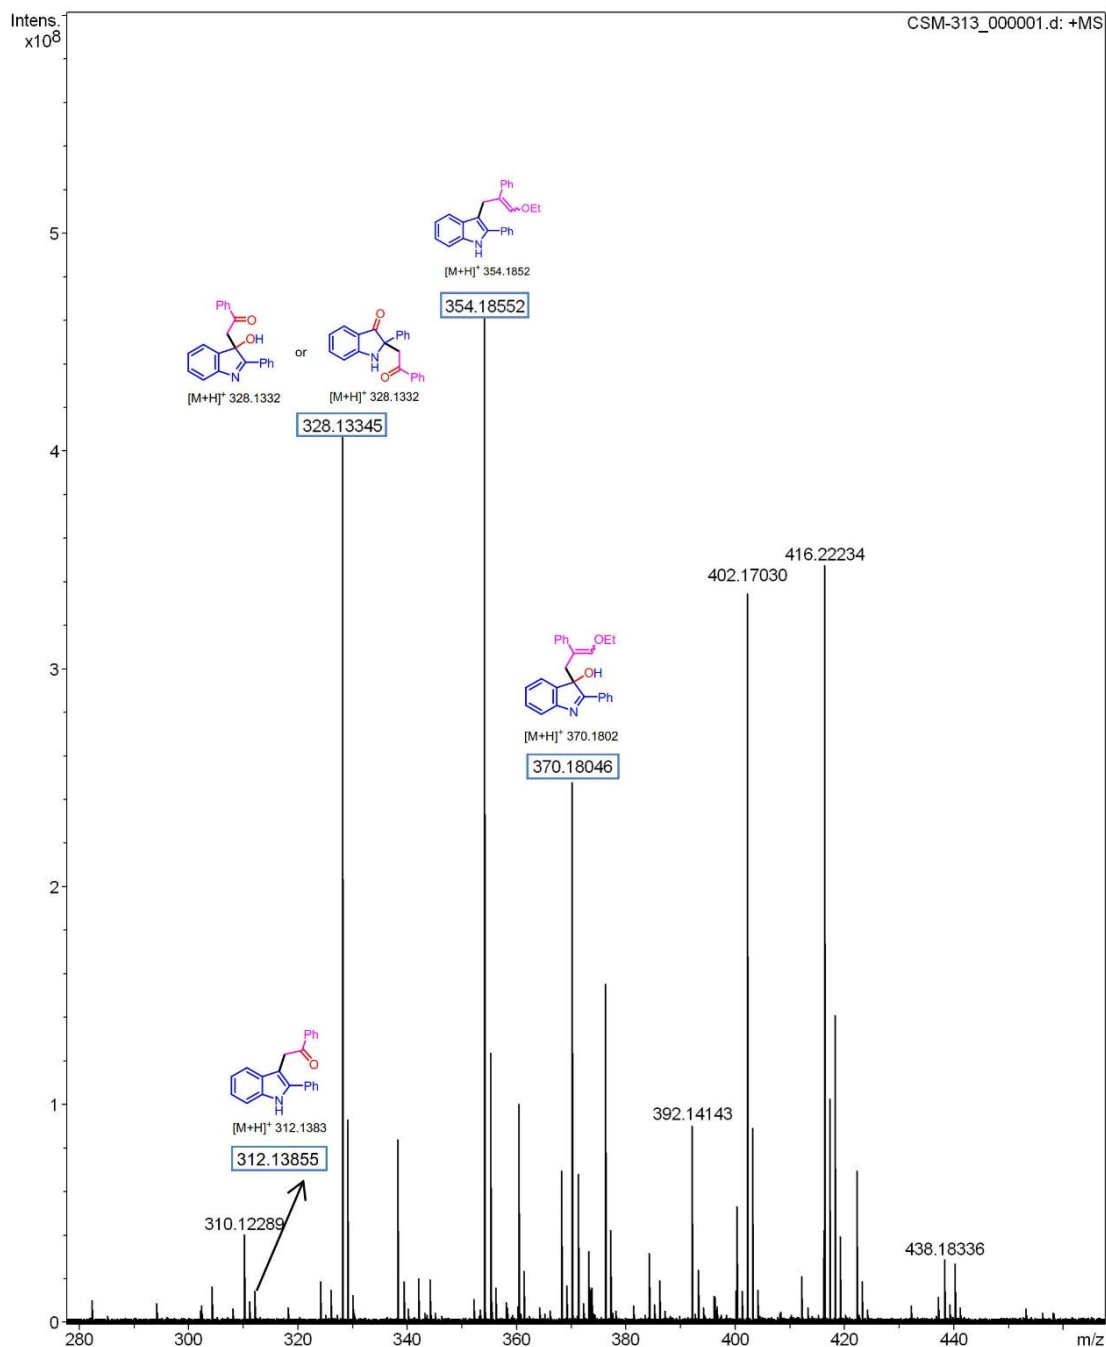

**Figure S1.** The key intermediates detected by HRMS after 3 h of the reaction.

### 6.5 The key intermediates detected by HRMS for the synthesis of stilbene

The reactions were conducted in a 10 mL of V-type flask equipped with oil bath and triangle magnetic stirring. The mixture of **2a** (0.2 mmol), **5a** (0.4 mmol) and AlCl<sub>3</sub> (0.04 mmol, 20 mol%) in EtOH (1.0 mL) was stirred at 80 °C for 20 min. After the completion of the reaction, the mixture cooled to room temperature, and the crude mixture was detected by HRMS.

## Generic Display Report (all)

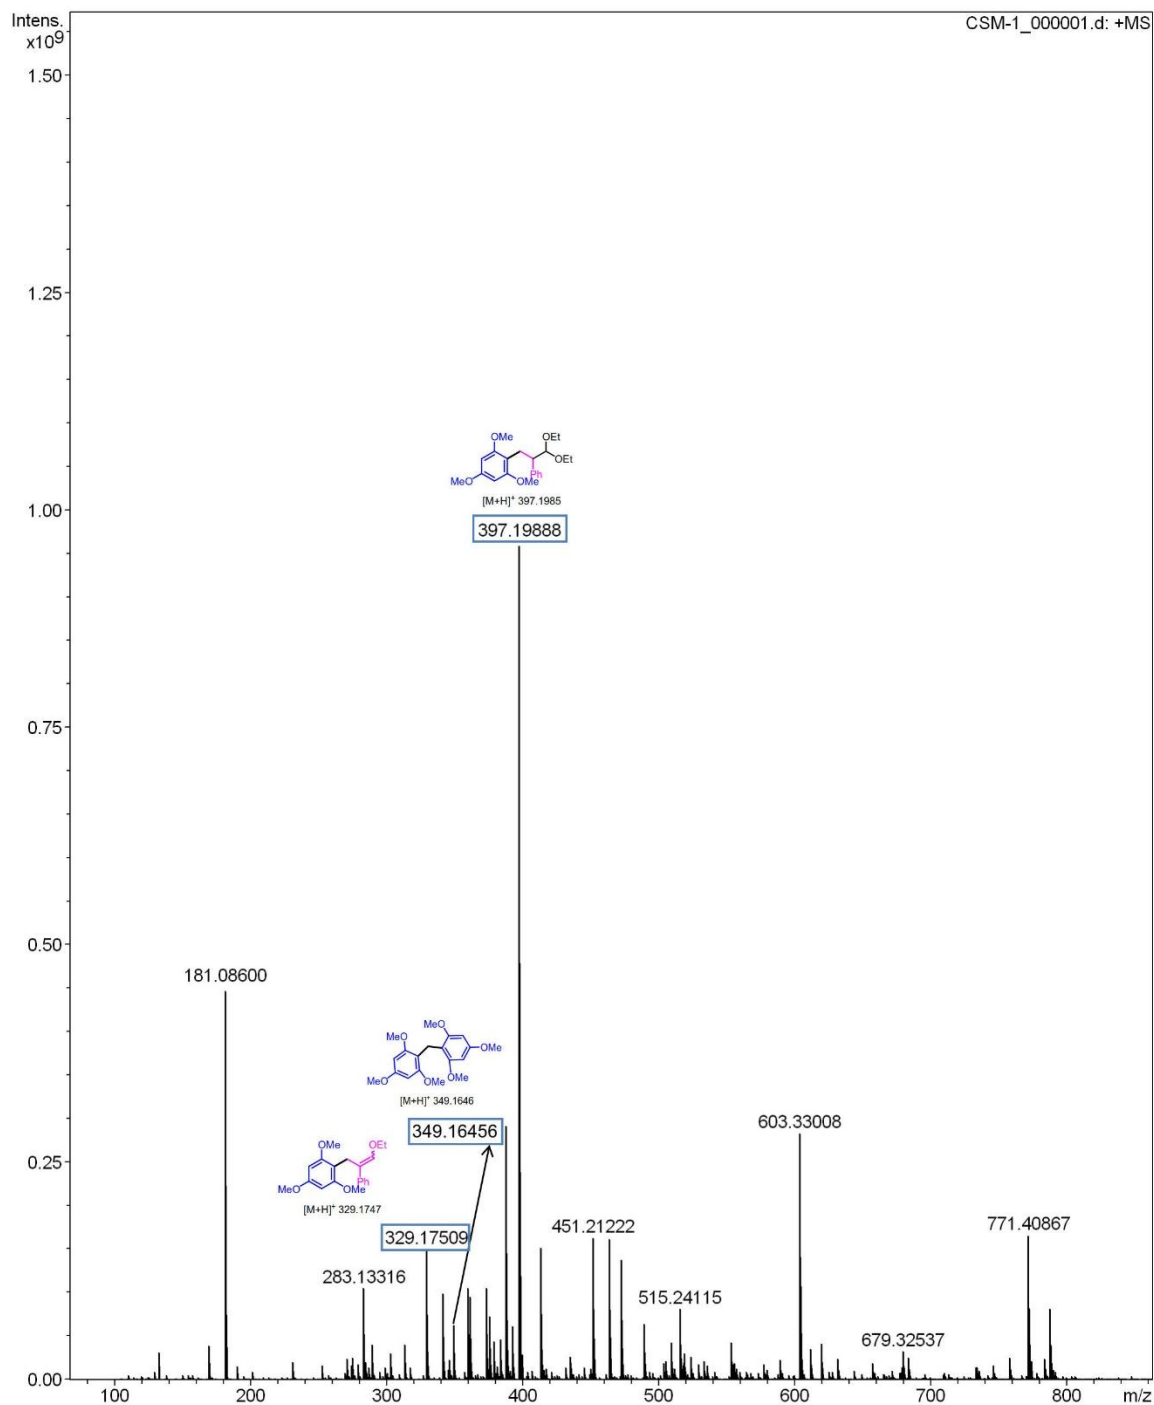

**Figure S2.** The key intermediates detected by HRMS after 20 min of the reaction.

### 7 X-ray crystallographic data

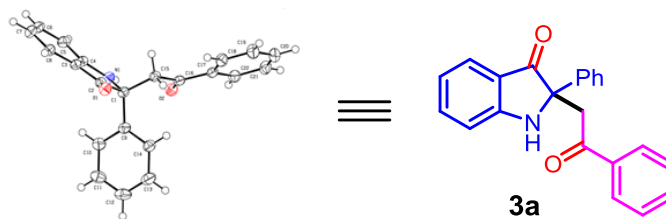

**Figure S3.** The X-ray diffraction structure of **3a**.

**Table S7. Crystal data and structure refinement for 3a.**

|                                    |                                                               |
|------------------------------------|---------------------------------------------------------------|
| Identification code                | 2317                                                          |
| Empirical formula                  | C <sub>22</sub> H <sub>17</sub> NO <sub>2</sub>               |
| Formula weight                     | 327.36                                                        |
| Temperature/K                      | 100.01(10)                                                    |
| Crystal system                     | monoclinic                                                    |
| Space group                        | P2 <sub>1</sub> /c                                            |
| a/Å                                | 13.4881(8)                                                    |
| b/Å                                | 12.4082(7)                                                    |
| c/Å                                | 10.0756(6)                                                    |
| α/°                                | 90                                                            |
| β/°                                | 100.714(6)                                                    |
| γ/°                                | 90                                                            |
| Volume/Å <sup>3</sup>              | 1656.89(17)                                                   |
| Z                                  | 4                                                             |
| ρ <sub>calc</sub> /cm <sup>3</sup> | 1.312                                                         |
| μ/mm <sup>-1</sup>                 | 0.669                                                         |
| F(000)                             | 688.0                                                         |
| Crystal size/mm <sup>3</sup>       | 0.11 × 0.1 × 0.08                                             |
| Radiation                          | CuKα (λ = 1.54184)                                            |
| 2θ range for data collection/°     | 6.67 to 147.138                                               |
| Index ranges                       | -16 ≤ h ≤ 12, -11 ≤ k ≤ 15, -11 ≤ l ≤ 12                      |
| Reflections collected              | 6716                                                          |
| Independent reflections            | 3252 [R <sub>int</sub> = 0.0324, R <sub>sigma</sub> = 0.0421] |
| Data/restraints/parameters         | 3252/0/226                                                    |
| Goodness-of-fit on F <sup>2</sup>  | 1.035                                                         |
| Final R indexes [I ≥ 2σ (I)]       | R <sub>1</sub> = 0.0511, wR <sub>2</sub> = 0.1287             |
| Final R indexes [all data]         | R <sub>1</sub> = 0.0618, wR <sub>2</sub> = 0.1379             |
| Largest diff. peak and hole        | 0.25 and -0.31 e.Å <sup>-3</sup>                              |

## 8 Characterization data of products

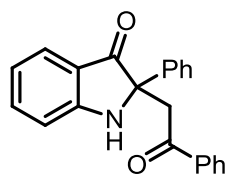

2-(2-Oxo-2-phenylethyl)-2-phenylindolin-3-one (**3a**)<sup>4</sup>: yellow solid (46 mg, 70% yield), mp: 148–150 °C; <sup>1</sup>H NMR (400 MHz, CDCl<sub>3</sub>, TMS, 25 °C)  $\delta$  = 7.91 (d,  $J$  = 7.4 Hz, 2H), 7.65–7.52 (m, 4H), 7.52–7.41 (m, 3H), 7.28 (t,  $J$  = 7.5 Hz, 2H), 7.21 (t,  $J$  = 7.2 Hz, 1H), 6.96 (d,  $J$  = 8.3 Hz, 1H), 6.80 (t,  $J$  = 7.4 Hz, 1H), 6.30 (s, 1H), 4.44 (d,  $J$  = 17.9 Hz, 1H), 3.18 ppm (d,  $J$  = 17.9 Hz, 1H); <sup>13</sup>C NMR (100 MHz, CDCl<sub>3</sub>, 25 °C)  $\delta$  = 200.8, 197.9, 160.4, 138.2, 137.9, 136.7, 133.9, 128.9, 128.8, 128.2, 127.7, 125.8, 125.5, 119.0, 118.3, 111.9, 69.4, 44.9 ppm.

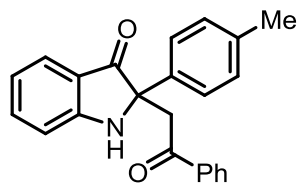

2-(2-Oxo-2-phenylethyl)-2-(p-tolyl)indolin-3-one (**3b**)<sup>5</sup>: yellow solid (40 mg, 58% yield), mp: 205–207 °C; <sup>1</sup>H NMR (400 MHz, CDCl<sub>3</sub>, TMS, 25 °C)  $\delta$  = 7.92 (d,  $J$  = 7.3 Hz, 2H), 7.57 (dd,  $J$  = 7.6, 5.4 Hz, 2H), 7.50–7.40 (m, 5H), 7.08 (d,  $J$  = 8.0 Hz, 2H), 6.95 (d,  $J$  = 8.2 Hz, 1H), 6.80 (t,  $J$  = 7.4 Hz, 1H), 6.27 (s, 1H), 4.42 (d,  $J$  = 18.0 Hz, 1H), 3.16 (d,  $J$  = 18.0 Hz, 1H), 2.26 ppm (s, 3H); <sup>13</sup>C NMR (100 MHz, CDCl<sub>3</sub>, 25 °C)  $\delta$  = 200.9, 198.0, 160.4, 137.8, 137.4, 136.8, 135.1, 133.8, 129.6, 128.9, 128.3, 125.8, 125.3, 118.9, 118.3, 111.9, 69.3, 44.7, 21.1 ppm.

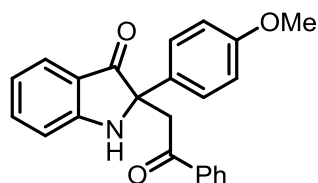

2-(4-Methoxyphenyl)-2-(2-oxo-2-phenylethyl)indolin-3-one (**3c**)<sup>5</sup>: yellow solid (34 mg, 47% yield), mp: 127–129 °C; <sup>1</sup>H NMR (400 MHz, CDCl<sub>3</sub>, TMS, 25 °C)  $\delta$  = 7.92 (d,  $J$  = 7.3 Hz, 2H), 7.57 (td,  $J$  = 7.3, 1.3 Hz, 2H), 7.51–7.42 (m, 5H), 6.95 (d,  $J$  = 8.2 Hz, 1H), 6.80 (dd,  $J$  = 8.2, 6.5 Hz, 3H), 6.28 (s, 1H), 4.39 (d,  $J$  = 17.9 Hz, 1H), 3.73 (s, 3H), 3.14 ppm (d,  $J$  = 17.9 Hz, 1H); <sup>13</sup>C NMR (100 MHz, CDCl<sub>3</sub>, 25 °C)  $\delta$  = 201.1, 198.1, 160.3, 159.2, 137.9, 136.8, 133.9, 130.1, 128.9, 128.3, 126.7, 125.8, 118.9, 118.3, 114.3, 111.9, 69.0, 55.4, 44.7 ppm; IR (KBr)  $\nu$  = 3384, 2932, 2836, 1687, 1618, 1510, 1251, 752, 690, 513 cm<sup>-1</sup>; HRMS (ESI, TOF)  $m/z$ : calcd for C<sub>23</sub>H<sub>20</sub>NO<sub>3</sub>, [M + H]<sup>+</sup> 358.1438, found 358.1436.

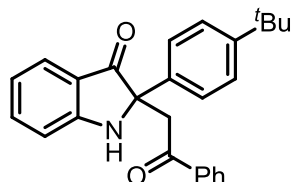

2-(4-(*tert*-Butyl)phenyl)-2-(2-oxo-2-phenylethyl)indolin-3-one (**3d**): yellow solid (34 mg, 44% yield), mp: 185–187 °C; <sup>1</sup>H NMR (400 MHz, CDCl<sub>3</sub>, TMS, 25 °C)  $\delta$  = 7.92 (d,  $J$  = 7.4 Hz, 2H), 7.56 (t,  $J$  = 7.5 Hz, 2H), 7.45 (p,  $J$  = 7.4 Hz, 5H), 7.29–7.25 (m, 2H), 6.95 (d,  $J$  = 8.2 Hz, 1H), 6.79 (t,  $J$  = 7.4 Hz, 1H), 6.27 (s, 1H), 4.42 (d,  $J$  = 17.9 Hz, 1H), 3.18 (d,  $J$  = 18.0 Hz, 1H), 1.23 ppm (s, 9H); <sup>13</sup>C NMR (100 MHz, CDCl<sub>3</sub>, 25 °C)  $\delta$  = 201.1, 198.0, 160.4, 150.4, 137.8,



136.7, 135.0, 133.8, 128.8, 128.2, 125.8, 125.7, 125.0, 118.9, 118.4, 111.9, 69.3, 44.7, 34.5, 31.4 ppm; IR (KBr)  $\nu = 3385, 2962, 2905, 2867, 1685, 1620, 1489, 1217, 754, 690, 508 \text{ cm}^{-1}$ ; HRMS (ESI, TOF)  $m/z$ : calcd for  $\text{C}_{26}\text{H}_{26}\text{NO}_2$ ,  $[\text{M} + \text{H}]^+$  384.1958, found 384.1956.

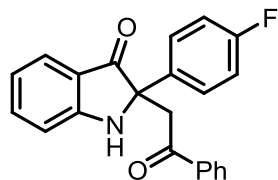

2-(4-Fluorophenyl)-2-(2-oxo-2-phenylethyl)indolin-3-one (**3e**)<sup>6</sup>: yellow solid (46 mg, 67% yield), mp: 151–153 °C;  $^1\text{H}$  NMR (400 MHz,  $\text{CDCl}_3$ , TMS, 25 °C)  $\delta = 7.90$  (d,  $J = 7.3$  Hz, 2H), 7.62–7.52 (m, 4H), 7.50 (ddd,  $J = 8.4, 7.0, 1.3$  Hz, 1H), 7.45 (t,  $J = 7.8$  Hz, 2H), 6.96 (dt,  $J = 8.7, 4.5$  Hz, 3H), 6.82 (t,  $J = 7.4$  Hz, 1H), 6.33 (s, 1H), 4.39 (d,  $J = 17.9$  Hz, 1H), 3.14 ppm (d,  $J = 17.9$  Hz, 1H);  $^{13}\text{C}$  NMR (100 MHz,  $\text{CDCl}_3$ , 25 °C)  $\delta = 200.7, 198.0, 163.7$  (d,  $^1J_{\text{C-F}} = 245$  Hz), 160.2, 138.1, 136.6, 134.0, 133.9 (d,  $^4J_{\text{C-F}} = 3$  Hz), 130.1 (d,  $^3J_{\text{C-F}} = 8$  Hz), 128.9, 128.2, 127.4 (d,  $^3J_{\text{C-F}} = 8$  Hz), 125.8, 119.9 (d,  $^2J_{\text{C-F}} = 18$  Hz), 119.2, 118.1, 115.7 (d,  $^2J_{\text{C-F}} = 21$  Hz), 112.0, 68.9, 45.0 ppm;  $^{19}\text{F}$  NMR (377 MHz,  $\text{CDCl}_3$ , 25 °C)  $\delta = -115.4$  (m, 1F) ppm; IR (KBr)  $\nu = 3385, 2921, 2849, 1687, 1619, 1507, 1219, 752, 513 \text{ cm}^{-1}$ ; HRMS (ESI, TOF)  $m/z$ : calcd for  $\text{C}_{22}\text{H}_{17}\text{FNO}_2$ ,  $[\text{M} + \text{H}]^+$  346.1238, found 346.1236.

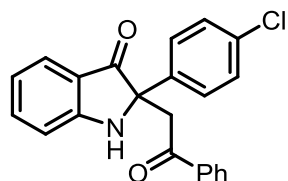

2-(4-Chlorophenyl)-2-(2-oxo-2-phenylethyl)indolin-3-one (**3f**)<sup>5</sup>: yellow solid (56 mg, 78% yield), mp: 153–155 °C;  $^1\text{H}$  NMR (400 MHz,  $\text{CDCl}_3$ , TMS, 25 °C)  $\delta = 7.90$  (d,  $J = 7.4$  Hz, 2H), 7.58 (dt,  $J = 7.5, 3.6$  Hz, 2H), 7.48 (dt,  $J = 21.6, 8.1$  Hz, 5H), 7.24 (d,  $J = 8.7$  Hz, 2H), 6.96 (d,  $J = 8.3$  Hz, 1H), 6.82 (t,  $J = 7.4$  Hz, 1H), 6.31 (s, 1H), 4.38 (d,  $J = 18.0$  Hz, 1H), 3.15 ppm (d,  $J = 18.0$  Hz, 1H);  $^{13}\text{C}$  NMR (100 MHz,  $\text{CDCl}_3$ , 25 °C)  $\delta = 200.4, 197.9, 160.2, 138.1, 136.9, 136.5, 134.1, 133.7, 128.9, 128.9, 128.2, 127.1, 125.8, 119.2, 118.1, 112.0, 69.0, 44.9$  ppm.

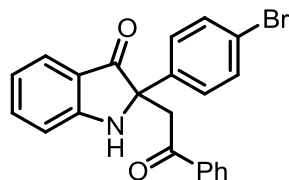

2-(4-Bromophenyl)-2-(2-oxo-2-phenylethyl)indolin-3-one (**3g**): yellow solid (53 mg, 66% yield), mp: 164–166 °C;  $^1\text{H}$  NMR (400 MHz,  $\text{CDCl}_3$ , TMS, 25 °C)  $\delta = 7.90$  (d,  $J = 7.4$  Hz, 2H), 7.62–7.55 (m, 2H), 7.53–7.43 (m, 5H), 7.40 (d,  $J = 8.6$  Hz, 2H), 6.96 (d,  $J = 8.3$  Hz, 1H), 6.82 (t,  $J = 7.4$  Hz, 1H), 6.31 (s, 1H), 4.38 (d,  $J = 18.0$  Hz, 1H), 3.15 ppm (d,  $J = 18.0$  Hz, 1H);  $^{13}\text{C}$  NMR (100 MHz,  $\text{CDCl}_3$ , 25 °C)  $\delta = 200.3, 197.8, 160.2, 138.1, 137.4, 136.5, 134.1, 131.9, 128.9, 128.2, 127.4, 125.8, 121.9, 119.3, 118.0, 112.0, 69.0, 44.9$  ppm; IR (KBr)  $\nu = 3385, 2923, 2852, 1685, 1618, 1487, 1217, 1006, 753, 516 \text{ cm}^{-1}$ ; HRMS (ESI, TOF)  $m/z$ : calcd for  $\text{C}_{22}\text{H}_{17}\text{BrNO}_2$ ,  $[\text{M} + \text{H}]^+$  406.0437, found 406.0436.

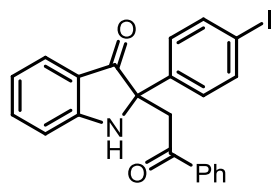

2-(4-Iodophenyl)-2-(2-oxo-2-phenylethyl)indolin-3-one (**3h**): yellow solid (34 mg, 38% yield), mp: 176–178 °C;  $^1\text{H}$  NMR (400 MHz,  $\text{CDCl}_3$ , TMS, 25 °C)  $\delta$  = 7.90 (d,  $J$  = 7.3 Hz, 2H), 7.62–7.56 (m, 4H), 7.50 (ddd,  $J$  = 8.4, 7.1, 1.3 Hz, 1H), 7.46 (t,  $J$  = 7.7 Hz, 2H), 7.32 (d,  $J$  = 8.6 Hz, 2H), 6.96 (d,  $J$  = 8.3 Hz, 1H), 6.82 (t,  $J$  = 7.5 Hz, 1H), 6.28 (s, 1H), 4.37 (d,  $J$  = 18.1 Hz, 1H), 3.14 ppm (d,  $J$  = 18.0 Hz, 1H);  $^{13}\text{C}$  NMR (100 MHz,  $\text{CDCl}_3$ , 25 °C)  $\delta$  = 200.2, 197.8, 160.2, 138.2, 138.1, 137.8, 136.5, 134.1, 129.0, 128.2, 127.6, 125.8, 119.3, 118.0, 112.0, 93.6, 69.1, 44.8 ppm; IR (KBr)  $\nu$  = 3384, 2920, 1684, 1618, 1486, 1218, 1003, 753, 515  $\text{cm}^{-1}$ ; HRMS (ESI, TOF)  $m/z$ : calcd for  $\text{C}_{22}\text{H}_{17}\text{INO}_2$ ,  $[\text{M} + \text{H}]^+$  454.0298, found 454.0297.

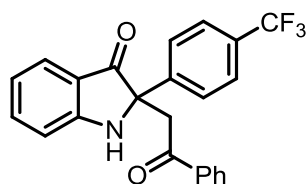

2-(2-Oxo-2-phenylethyl)-2-(4-(trifluoromethyl)phenyl)indolin-3-one (**3i**): yellow solid (46 mg, 59% yield), mp: 171–173 °C;  $^1\text{H}$  NMR (400 MHz,  $\text{CDCl}_3$ , TMS, 25 °C)  $\delta$  = 7.91 (d,  $J$  = 7.3 Hz, 2H), 7.71 (d,  $J$  = 8.2 Hz, 2H), 7.61–7.50 (m, 5H), 7.46 (t,  $J$  = 7.7 Hz, 2H), 6.99 (d,  $J$  = 8.3 Hz, 1H), 6.84 (t,  $J$  = 7.4 Hz, 1H), 6.35 (s, 1H), 4.44 (d,  $J$  = 18.1 Hz, 1H), 3.20 ppm (d,  $J$  = 18.1 Hz, 1H);  $^{13}\text{C}$  NMR (100 MHz,  $\text{CDCl}_3$ , 25 °C)  $\delta$  = 200.0, 197.7, 160.3, 142.4, 138.3, 136.4, 134.2, 129.7, 128.8 (q,  $^2J_{\text{C-F}}$  = 52.0 Hz), 127.4 (q,  $^1J_{\text{C-F}}$  = 269.0 Hz), 126.4, 126.1, 125.9, 125.8 (q,  $^3J_{\text{C-F}}$  = 4 Hz), 119.4, 117.9, 112.1, 69.2, 45.1 ppm;  $^{19}\text{F}$  NMR (377 MHz,  $\text{CDCl}_3$ , 25 °C)  $\delta$  = -62.6 (s, 3F) ppm; IR (KBr)  $\nu$  = 3383, 2923, 2851, 1687, 1619, 1326, 1125, 1070, 753, 515  $\text{cm}^{-1}$ ; HRMS (ESI, TOF)  $m/z$ : calcd for  $\text{C}_{23}\text{H}_{17}\text{F}_3\text{NO}_2$ ,  $[\text{M} + \text{H}]^+$  396.1206, found 396.1204.

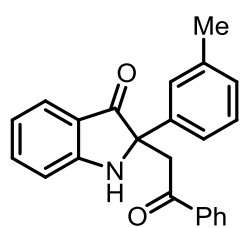

2-(2-Oxo-2-phenylethyl)-2-(m-tolyl)indolin-3-one (**3j**): yellow solid (30 mg, 45% yield), mp: 157–159 °C;  $^1\text{H}$  NMR (400 MHz,  $\text{CDCl}_3$ , TMS, 25 °C)  $\delta$  = 7.92 (d,  $J$  = 7.3 Hz, 2H), 7.57 (t,  $J$  = 7.4 Hz, 2H), 7.51–7.42 (m, 3H), 7.33 (d,  $J$  = 6.8 Hz, 2H), 7.17 (t,  $J$  = 8.0 Hz, 1H), 7.02 (d,  $J$  = 7.5 Hz, 1H), 6.96 (d,  $J$  = 8.3 Hz, 1H), 6.80 (t,  $J$  = 7.4 Hz, 1H), 6.27 (s, 1H), 4.43 (d,  $J$  = 17.9 Hz, 1H), 3.17 (d,  $J$  = 17.9 Hz, 1H), 2.28 ppm (s, 3H);  $^{13}\text{C}$  NMR (100 MHz,  $\text{CDCl}_3$ , 25 °C)  $\delta$  = 200.9, 197.9, 160.4, 138.4, 138.0, 137.9, 136.7, 133.8, 128.9, 128.7, 128.6, 128.2, 126.1, 125.8, 122.5, 118.9, 118.3, 111.9, 69.4, 44.9, 21.8 ppm; IR (KBr)  $\nu$  = 3384, 2920, 2859, 1687, 1618, 1488, 1217, 752, 689, 507  $\text{cm}^{-1}$ ; HRMS (ESI, TOF)  $m/z$ : calcd for  $\text{C}_{23}\text{H}_{20}\text{NO}_2$ ,  $[\text{M} + \text{H}]^+$  342.1489, found 342.1487.

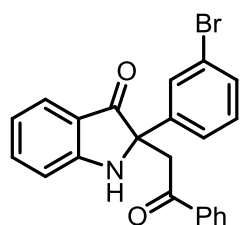

2-(3-Bromophenyl)-2-(2-oxo-2-phenylethyl)indolin-3-one (**3k**): yellow

solid (62 mg, 77% yield), mp: 179–181 °C; <sup>1</sup>H NMR (400 MHz, CDCl<sub>3</sub>, TMS, 25 °C) δ = 7.90 (d, *J* = 7.4 Hz, 2H), 7.73 (t, *J* = 1.9 Hz, 1H), 7.60–7.55 (m, 2H), 7.53–7.48 (m, 2H), 7.45 (t, *J* = 7.7 Hz, 2H), 7.34 (d, *J* = 8.5 Hz, 1H), 7.15 (t, *J* = 7.9 Hz, 1H), 6.97 (d, *J* = 8.3 Hz, 1H), 6.82 (t, *J* = 7.4 Hz, 1H), 6.30 (s, 1H), 4.36 (d, *J* = 18.0 Hz, 1H), 3.16 ppm (d, *J* = 18.0 Hz, 1H); <sup>13</sup>C NMR (100 MHz, CDCl<sub>3</sub>, 25 °C) δ = 200.1, 197.7, 160.2, 140.7, 138.2, 136.5, 134.0, 130.8, 130.3, 128.9, 128.8, 128.2, 125.8, 124.3, 123.0, 119.3, 118.0, 112.1, 68.9, 45.1 ppm; IR (KBr) ν = 3384, 2921, 2848, 1685, 1618, 1488, 1218, 753, 689, 507 cm<sup>-1</sup>; HRMS (ESI, TOF) *m/z*: calcd for C<sub>22</sub>H<sub>17</sub>BrNO<sub>2</sub>, [M + H]<sup>+</sup> 406.0437, found 406.0436.

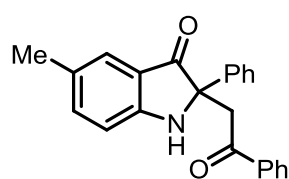

5-Methyl-2-(2-oxo-2-phenylethyl)-2-phenylindolin-3-one (**3l**)<sup>5</sup>:

yellow solid (46 mg, 68% yield), mp: 181–183 °C; <sup>1</sup>H NMR (400 MHz, CDCl<sub>3</sub>, TMS, 25 °C) δ = 7.91 (d, *J* = 7.3 Hz, 2H), 7.55 (dd, *J* = 15.3, 7.6 Hz, 3H), 7.44 (t, *J* = 7.7 Hz, 2H), 7.37 (s, 1H), 7.33 (dd, *J* = 8.3, 1.8 Hz, 1H), 7.27 (t, *J* = 6.8 Hz, 2H), 7.22–7.18 (m, 1H), 6.89 (d, *J* = 8.3 Hz, 1H), 6.14 (s, 1H), 4.42 (d, *J* = 17.9 Hz, 1H), 3.18 (d, *J* = 17.9 Hz, 1H), 2.28 ppm (s, 3H); <sup>13</sup>C NMR (100 MHz, CDCl<sub>3</sub>, 25 °C) δ = 200.9, 197.9, 158.9, 139.4, 138.4, 136.7, 133.8, 128.8, 128.8, 128.5, 128.2, 127.6, 125.4, 125.0, 118.4, 111.9, 69.8, 44.9, 20.6 ppm.

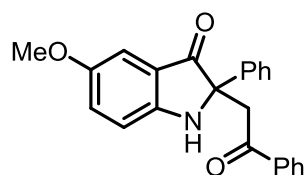

5-Methoxy-2-(2-oxo-2-phenylethyl)-2-phenylindolin-3-one (**3m**)<sup>6</sup>:

yellow solid (39 mg, 56% yield), mp: 203–205 °C; <sup>1</sup>H NMR (400 MHz, CDCl<sub>3</sub>, TMS, 25 °C) δ = 7.92 (d, *J* = 7.3 Hz, 2H), 7.56 (dd, *J* = 13.2, 7.4 Hz, 3H), 7.45 (t, *J* = 7.7 Hz, 2H), 7.28 (s, 2H), 7.25–7.16 (m, 2H), 7.01 (d, *J* = 2.5 Hz, 1H), 6.94 (d, *J* = 8.8 Hz, 1H), 6.01 (s, 1H), 4.41 (d, *J* = 17.8 Hz, 1H), 3.76 (s, 3H), 3.21 ppm (d, *J* = 17.8 Hz, 1H); <sup>13</sup>C NMR (100 MHz, CDCl<sub>3</sub>, 25 °C) δ = 201.0, 197.9, 156.3, 153.5, 138.4, 136.8, 133.8, 128.9, 128.8, 128.6, 128.3, 127.7, 125.5, 118.5, 113.5, 105.4, 70.4, 56.0, 45.0 ppm; IR (KBr) ν = 3392, 2920, 2849, 1685, 1497, 1448, 1216, 753, 527 cm<sup>-1</sup>; HRMS (ESI, TOF) *m/z*: calcd for C<sub>23</sub>H<sub>20</sub>NO<sub>3</sub>, [M + H]<sup>+</sup> 358.1438, found 358.1436.

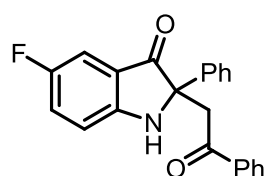

5-Fluoro-2-(2-oxo-2-phenylethyl)-2-phenylindolin-3-one (**3n**)<sup>5</sup>:

yellow solid (43 mg, 62% yield), mp: 150–152 °C; <sup>1</sup>H NMR (400 MHz, CDCl<sub>3</sub>, TMS, 25 °C) δ = 7.91 (d, *J* = 7.3 Hz, 2H), 7.60–7.52 (m, 3H), 7.44 (t, *J* = 7.7 Hz, 2H), 7.32–7.25 (m, 3H), 7.25–7.21 (m, 2H), 6.93 (dd, *J* = 8.7, 3.6 Hz, 1H), 6.18 (s, 1H), 4.40 (d, *J* = 17.9 Hz, 1H), 3.21 ppm (d, *J* = 17.9 Hz, 1H); <sup>13</sup>C NMR (100

MHz, CDCl<sub>3</sub>, 25 °C)  $\delta$  = 200.6 (d, <sup>4</sup>J<sub>C-F</sub> = 3.0 Hz, C=O), 197.7 (C=O), 157.7 (d, <sup>1</sup>J<sub>C-F</sub> = 238.0 Hz), 157.0, 137.9, 136.6, 133.9, 128.9, 128.3, 127.9, 126.1 (d, <sup>2</sup>J<sub>C-F</sub> = 26.0 Hz), 125.4, 118.8 (d, <sup>3</sup>J<sub>C-F</sub> = 7.0 Hz), 113.1 (d, <sup>3</sup>J<sub>C-F</sub> = 8.0 Hz), 110.5 (d, <sup>2</sup>J<sub>C-F</sub> = 22.0 Hz), 70.5, 45.0 ppm; <sup>19</sup>F NMR (377 MHz, CDCl<sub>3</sub>, 25 °C)  $\delta$  = -125.0 (sextet, 1F) ppm.

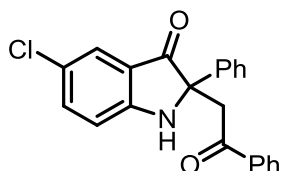

5-Chloro-2-(2-oxo-2-phenylethyl)-2-phenylindolin-3-one (**3o**)<sup>5</sup>: yellow solid (40 mg, 56% yield), mp: 146–148 °C; <sup>1</sup>H NMR (400 MHz, CDCl<sub>3</sub>, TMS, 25 °C)  $\delta$  = 7.91 (d, *J* = 7.4 Hz, 2H), 7.58 (t, *J* = 7.4 Hz, 1H), 7.52 (d, *J* = 8.6 Hz, 3H), 7.47–7.41 (m, 3H), 7.29 (t, *J* = 7.4 Hz, 2H), 7.23 (t, *J* = 7.2 Hz, 1H), 6.92 (d, *J* = 8.7 Hz, 1H), 6.32 (s, 1H), 4.42 (d, *J* = 17.9 Hz, 1H), 3.20 ppm (d, *J* = 17.9 Hz, 1H); <sup>13</sup>C NMR (100 MHz, CDCl<sub>3</sub>, 25 °C)  $\delta$  = 199.6, 197.7, 158.6, 137.8, 137.7, 136.6, 134.0, 128.9, 128.9, 128.3, 127.9, 125.4, 125.0, 124.2, 119.4, 113.1, 70.2, 44.9 ppm.

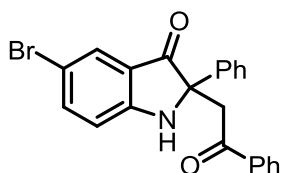

5-Bromo-2-(2-oxo-2-phenylethyl)-2-phenylindolin-3-one (**3p**): yellow solid (60 mg, 74% yield), mp: 154–156 °C; <sup>1</sup>H NMR (400 MHz, CDCl<sub>3</sub>, TMS, 25 °C)  $\delta$  = 7.91 (d, *J* = 7.3 Hz, 2H), 7.69 (d, *J* = 1.8 Hz, 1H), 7.60–7.50 (m, 4H), 7.45 (t, *J* = 7.7 Hz, 2H), 7.29 (t, *J* = 7.4 Hz, 2H), 7.23 (t, *J* = 7.2 Hz, 1H), 6.87 (d, *J* = 8.7 Hz, 1H), 6.34 (s, 1H), 4.42 (d, *J* = 17.9 Hz, 1H), 3.20 ppm (d, *J* = 17.9 Hz, 1H); <sup>13</sup>C NMR (100 MHz, CDCl<sub>3</sub>, 25 °C)  $\delta$  = 199.4, 197.7, 158.8, 140.3, 137.6, 136.5, 134.0, 129.0, 128.9, 128.3, 128.1, 127.9, 125.34, 120.0, 113.5, 111.0, 70.1, 44.8 ppm; IR (KBr)  $\nu$  = 3382, 2920, 2849, 1687, 1613, 1474, 1217, 1167, 753, 697, 509 cm<sup>-1</sup>; HRMS (ESI, TOF) *m/z*: calcd for C<sub>22</sub>H<sub>17</sub>BrNO<sub>2</sub>, [M + H]<sup>+</sup> 406.0437, found 406.0436.

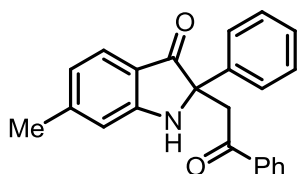

6-Methyl-2-(2-oxo-2-phenylethyl)-2-phenylindolin-3-one (**3q**)<sup>6</sup>: yellow solid (34 mg, 51% yield), mp: 160–162 °C; <sup>1</sup>H NMR (400 MHz, CDCl<sub>3</sub>, TMS, 25 °C)  $\delta$  = 7.92 (d, *J* = 7.3 Hz, 2H), 7.55 (dd, *J* = 12.2, 7.5 Hz, 3H), 7.48–7.42 (m, 3H), 7.28 (d, *J* = 7.2 Hz, 2H), 7.25 (s, 1H), 7.20 (t, *J* = 7.3 Hz, 1H), 6.77 (s, 1H), 6.64 (d, *J* = 7.9 Hz, 1H), 6.22 (s, 1H), 4.44 (d, *J* = 17.9 Hz, 1H), 3.16 (d, *J* = 17.9 Hz, 1H), 2.38 ppm (s, 3H); <sup>13</sup>C NMR (100 MHz, CDCl<sub>3</sub>, 25 °C)  $\delta$  = 200.0, 198.1, 160.9, 149.7, 138.4, 136.8, 133.8, 128.9, 128.8, 128.3, 127.6, 125.5, 125.4, 120.9, 116.0, 111.9, 69.6, 44.9, 22.7 ppm; IR (KBr)  $\nu$  = 3384, 2919, 2848, 1686, 1621, 1217, 753, 692, 539 cm<sup>-1</sup>; HRMS (ESI, TOF) *m/z*: calcd for C<sub>23</sub>H<sub>20</sub>NO<sub>2</sub>, [M + H]<sup>+</sup> 342.1489, found 342.1487.

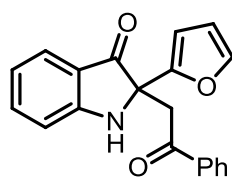

2-(Furan-2-yl)-2-(2-oxo-2-phenylethyl)indolin-3-one (**3r**): yellow solid (20 mg, 32% yield), mp: 104–106 °C;  $^1\text{H}$  NMR (400 MHz,  $\text{CDCl}_3$ , TMS, 25 °C)  $\delta$  = 7.96 (d,  $J$  = 7.3 Hz, 2H), 7.64 (d,  $J$  = 7.8 Hz, 1H), 7.59 (t,  $J$  = 7.4 Hz, 1H), 7.51–7.44 (m, 3H), 7.32–7.29 (m, 1H), 6.93 (d,  $J$  = 8.3 Hz, 1H), 6.86 (t,  $J$  = 7.4 Hz, 1H), 6.31–6.23 (m, 2H), 5.98 (s, 1H), 4.36 (d,  $J$  = 17.7 Hz, 1H), 3.22 ppm (d,  $J$  = 17.7 Hz, 1H);  $^{13}\text{C}$  NMR (100 MHz,  $\text{CDCl}_3$ , 25 °C)  $\delta$  = 198.7, 197.4, 160.6, 150.9, 142.9, 137.9, 136.5, 133.8, 128.9, 128.3, 125.7, 119.5, 118.8, 112.4, 110.9, 106.4, 66.6, 43.1 ppm; IR (KBr)  $\nu$  = 3379, 2921, 2850, 1690, 1618, 1487, 1219, 753, 690, 480  $\text{cm}^{-1}$ ; HRMS (ESI, TOF)  $m/z$ : calcd for  $\text{C}_{20}\text{H}_{15}\text{NNaO}_3$ ,  $[\text{M} + \text{Na}]^+$  340.0944, found 340.0944.

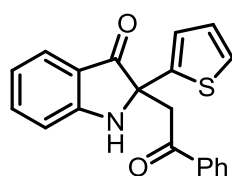

2-(2-Oxo-2-phenylethyl)-2-(thiophen-2-yl)indolin-3-one (**3s**)<sup>7</sup>: yellow solid (27 mg, 41% yield), mp: 122–124 °C;  $^1\text{H}$  NMR (400 MHz,  $\text{CDCl}_3$ , TMS, 25 °C)  $\delta$  = 7.93 (d,  $J$  = 7.3 Hz, 2H), 7.64–7.56 (m, 2H), 7.53–7.48 (m, 1H), 7.45 (t,  $J$  = 7.8 Hz, 2H), 7.12 (ddd,  $J$  = 8.7, 4.4, 1.2 Hz, 2H), 6.96 (d,  $J$  = 8.3 Hz, 1H), 6.91 (dd,  $J$  = 5.1, 3.7 Hz, 1H), 6.85 (t,  $J$  = 7.4 Hz, 1H), 6.41 (s, 1H), 4.31 (d,  $J$  = 17.6 Hz, 1H), 3.19 ppm (d,  $J$  = 17.6 Hz, 1H);  $^{13}\text{C}$  NMR (100 MHz,  $\text{CDCl}_3$ , 25 °C)  $\delta$  = 199.4, 197.7, 160.1, 142.9, 138.0, 136.7, 133.9, 128.9, 128.3, 127.7, 125.9, 124.9, 123.9, 119.5, 118.0, 112.3, 68.1, 45.5 ppm.

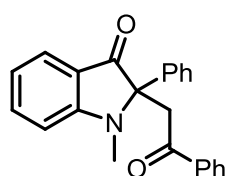

1-Methyl-2-(2-oxo-2-phenylethyl)-2-phenylindolin-3-one (**3t**): yellow solid (32 mg, 47% yield), mp: 150–152 °C;  $^1\text{H}$  NMR (400 MHz,  $\text{CDCl}_3$ , TMS, 25 °C)  $\delta$  = 7.90 (d,  $J$  = 7.3 Hz, 2H), 7.59–7.48 (m, 3H), 7.42 (t,  $J$  = 7.7 Hz, 2H), 7.37–7.28 (m, 5H), 6.82 (d,  $J$  = 8.3 Hz, 1H), 6.74 (t,  $J$  = 7.4 Hz, 1H), 4.21 (d,  $J$  = 17.0 Hz, 1H), 3.95 (d,  $J$  = 17.0 Hz, 1H), 2.93 ppm (s, 3H);  $^{13}\text{C}$  NMR (100 MHz,  $\text{CDCl}_3$ , 25 °C)  $\delta$  = 200.3, 195.4, 161.2, 137.4, 137.2, 136.6, 133.5, 129.3, 128.8, 128.3, 128.2, 126.0, 125.5, 119.8, 117.4, 107.6, 73.1, 43.2, 29.1 ppm; IR (KBr)  $\nu$  = 3061, 2918, 2830, 1702, 1617, 1492, 1320, 1220, 998, 750, 695, 574  $\text{cm}^{-1}$ ; HRMS (ESI, TOF)  $m/z$ : calcd for  $\text{C}_{23}\text{H}_{19}\text{NNaO}_2$ ,  $[\text{M} + \text{Na}]^+$  364.1308, found 364.1308.

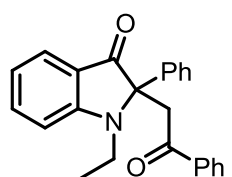

1-Ethyl-2-(2-oxo-2-phenylethyl)-2-phenylindolin-3-one (**3u**): yellow solid (24 mg, 34% yield), mp: 164–166 °C;  $^1\text{H}$  NMR (400 MHz,  $\text{CDCl}_3$ , TMS, 25 °C)  $\delta$  = 7.93 (d,  $J$  = 7.3 Hz, 2H), 7.63 (d,  $J$  = 7.6 Hz, 1H), 7.56 (t,  $J$  = 7.4 Hz,

1H), 7.53–7.48 (m, 1H), 7.44 (t,  $J = 7.7$  Hz, 2H), 7.35–7.25 (m, 5H), 6.84 (d,  $J = 8.3$  Hz, 1H), 6.77 (t,  $J = 7.4$  Hz, 1H), 4.21 (d,  $J = 17.6$  Hz, 1H), 4.07 (d,  $J = 17.6$  Hz, 1H), 3.54 (dq,  $J = 14.3, 7.1$  Hz, 1H), 3.28 (dq,  $J = 14.7, 7.3$  Hz, 1H), 0.99 ppm (t,  $J = 7.2$  Hz, 3H);  $^{13}\text{C}$  NMR (100 MHz,  $\text{CDCl}_3$ , 25 °C)  $\delta = 200.4, 195.0, 160.5, 137.5, 137.2, 136.6, 133.5, 129.2, 128.8, 128.2, 128.2, 126.2, 125.6, 120.0, 117.3, 107.6, 73.3, 43.8, 38.5, 14.3$  ppm; IR (KBr)  $\nu = 3060, 2927, 2871, 1692, 1616, 1489, 1322, 1219, 999, 750, 694, 581$   $\text{cm}^{-1}$ ; HRMS (ESI, TOF)  $m/z$ : calcd for  $\text{C}_{24}\text{H}_{22}\text{NO}_2$ ,  $[\text{M} + \text{H}]^+$  356.1645, found 356.1644.

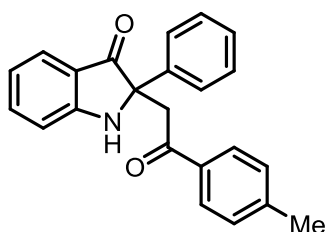

2-(2-Oxo-2-(*p*-tolyl)ethyl)-2-phenylindolin-3-one (**3v**)<sup>4</sup>: yellow solid (45 mg, 67% yield), mp: 182–184 °C;  $^1\text{H}$  NMR (400 MHz,  $\text{CDCl}_3$ , TMS, 25 °C)  $\delta = 7.82$  (d,  $J = 8.2$  Hz, 2H), 7.69–7.40 (m, 4H), 7.33–7.17 (m, 5H), 6.96 (d,  $J = 8.3$  Hz, 1H), 6.80 (t,  $J = 7.4$  Hz, 1H), 6.34 (s, 1H), 4.42 (d,  $J = 17.9$  Hz, 1H), 3.13 (d,  $J = 17.9$  Hz, 1H), 2.40 ppm (s, 3H);  $^{13}\text{C}$  NMR (100 MHz,  $\text{CDCl}_3$ , 25 °C)  $\delta = 200.9, 197.6, 160.4, 144.9, 138.2, 137.9, 134.3, 129.6, 128.8, 128.4, 127.7, 125.8, 125.5, 118.9, 118.3, 111.9, 69.5, 44.7, 21.8$  ppm.

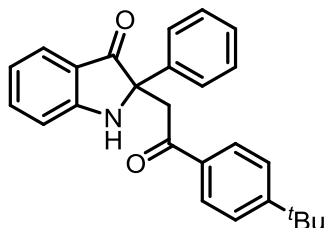

2-(2-(4-(*tert*-Butyl)phenyl)-2-oxoethyl)-2-phenylindolin-3-one (**3w**): yellow solid (37 mg, 49% yield), mp: 205–207 °C;  $^1\text{H}$  NMR (400 MHz,  $\text{CDCl}_3$ , TMS, 25 °C)  $\delta = 7.86$  (d,  $J = 8.5$  Hz, 2H), 7.56 (dd,  $J = 13.4, 7.7$  Hz, 3H), 7.51–7.44 (m, 3H), 7.28 (d,  $J = 7.2$  Hz, 2H), 7.20 (t,  $J = 7.2$  Hz, 1H), 6.96 (d,  $J = 8.3$  Hz, 1H), 6.80 (t,  $J = 7.4$  Hz, 1H), 6.35 (s, 1H), 4.44 (d,  $J = 18.0$  Hz, 1H), 3.13 (d,  $J = 17.9$  Hz, 1H), 1.32 ppm (s, 9H);  $^{13}\text{C}$  NMR (100 MHz,  $\text{CDCl}_3$ , 25 °C)  $\delta = 200.9, 197.6, 160.4, 157.8, 138.2, 137.9, 134.2, 128.8, 128.2, 127.6, 125.8, 125.7, 125.5, 118.9, 118.2, 111.9, 69.5, 44.7, 35.3, 31.2$  ppm; IR (KBr)  $\nu = 3386, 2964, 2906, 2868, 1681, 1620, 1489, 1225, 833, 755, 511$   $\text{cm}^{-1}$ ; HRMS (ESI, TOF)  $m/z$ : calcd for  $\text{C}_{26}\text{H}_{26}\text{NO}_2$ ,  $[\text{M} + \text{H}]^+$  384.1958, found 384.1956.

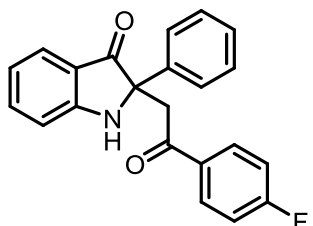

2-(2-(4-Fluorophenyl)-2-oxoethyl)-2-phenylindolin-3-one (**3x**)<sup>7</sup>: yellow solid (47 mg, 69% yield), mp: 167–169 °C;  $^1\text{H}$  NMR (400 MHz,  $\text{CDCl}_3$ , TMS, 25 °C)  $\delta = 7.98$ –7.90 (m, 2H), 7.56 (dd,  $J = 14.6, 7.6$  Hz, 3H), 7.52–7.47 (m, 1H), 7.28 (t,  $J = 7.5$  Hz, 2H), 7.21 (t,  $J = 7.2$  Hz, 1H), 7.11 (t,  $J = 8.6$  Hz, 2H), 6.96 (d,  $J = 8.2$  Hz, 1H), 6.81 (t,  $J = 7.4$  Hz, 1H), 6.27 (s, 1H), 4.39 (d,  $J = 17.8$  Hz, 1H), 3.16 ppm (d,  $J = 17.8$  Hz, 1H);  $^{13}\text{C}$  NMR (100 MHz,  $\text{CDCl}_3$ , 25

$^{\circ}\text{C}$ )  $\delta = 200.7, 196.3, 167.5$  (d,  $^1J_{\text{C-F}} = 255.0$  Hz),  $160.4, 138.1, 138.0, 133.2$  (d,  $^4J_{\text{C-F}} = 3.0$  Hz),  $131.0$ , (d,  $^3J_{\text{C-F}} = 9.0$  Hz),  $128.9, 127.8, 125.8, 125.4, 119.1, 118.3, 116.1$  (d,  $^2J_{\text{C-F}} = 22.0$  Hz),  $111.93, 69.34, 44.83$  ppm;  $^{19}\text{F}$  NMR (377 MHz,  $\text{CDCl}_3$ ,  $25^{\circ}\text{C}$ )  $\delta = -103.8$  (m, 1F) ppm.

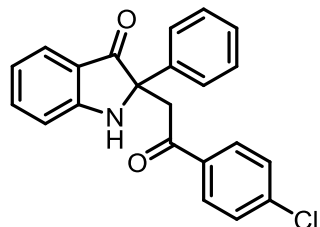

2-(2-(4-Chlorophenyl)-2-oxoethyl)-2-phenylindolin-3-one (**3y**):

yellow solid (58 mg, 80% yield), mp:  $172\text{--}174^{\circ}\text{C}$ ;  $^1\text{H}$  NMR (400 MHz,  $\text{CDCl}_3$ , TMS,  $25^{\circ}\text{C}$ )  $\delta = 7.85$  (d,  $J = 8.5$  Hz, 2H),  $7.53$  (td,  $J = 18.0, 7.5$  Hz, 4H),  $7.41$  (d,  $J = 8.5$  Hz, 2H),  $7.28$  (t,  $J = 7.5$  Hz, 2H),  $7.22$  (t,  $J = 7.3$  Hz, 1H),  $6.97$  (d,  $J = 8.2$  Hz, 1H),  $6.81$  (t,  $J = 7.4$  Hz, 1H),  $6.24$  (s, 1H),  $4.38$  (d,  $J = 17.9$  Hz, 1H),  $3.16$  ppm (d,  $J = 17.9$  Hz, 1H);  $^{13}\text{C}$  NMR (100 MHz,  $\text{CDCl}_3$ ,  $25^{\circ}\text{C}$ )  $\delta = 200.6, 196.7, 160.3, 140.4, 138.0, 138.0, 135.0, 129.7, 129.2, 128.9, 127.8, 125.8, 125.4, 119.1, 118.3, 111.9, 69.3, 44.9$  ppm.

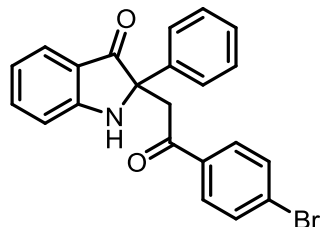

2-(2-(4-Bromophenyl)-2-oxoethyl)-2-phenylindolin-3-one (**3z**):

yellow solid (76 mg, 61% yield), mp:  $177\text{--}179^{\circ}\text{C}$ ;  $^1\text{H}$  NMR (400 MHz,  $\text{CDCl}_3$ , TMS,  $25^{\circ}\text{C}$ )  $\delta = 7.77$  (d,  $J = 8.6$  Hz, 2H),  $7.57$  (d,  $J = 2.4$  Hz, 3H),  $7.55\text{--}7.47$  (m, 3H),  $7.28$  (t,  $J = 7.5$  Hz, 2H),  $7.22$  (t,  $J = 7.2$  Hz, 1H),  $6.97$  (d,  $J = 8.2$  Hz, 1H),  $6.81$  (t,  $J = 7.4$  Hz, 1H),  $6.22$  (s, 1H),  $4.37$  (d,  $J = 17.9$  Hz, 1H),  $3.15$  ppm (d,  $J = 17.9$  Hz, 1H);  $^{13}\text{C}$  NMR (100 MHz,  $\text{CDCl}_3$ ,  $25^{\circ}\text{C}$ )  $\delta = 200.6, 196.9, 160.3, 138.0, 138.0, 135.4, 132.2, 129.7, 129.2, 128.9, 127.8, 125.8, 125.4, 119.2, 118.3, 111.9, 69.3, 44.9$  ppm.

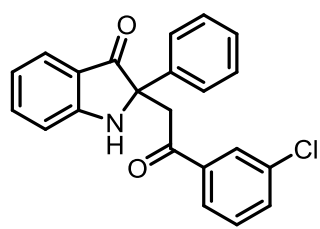

2-(2-(3-Chlorophenyl)-2-oxoethyl)-2-phenylindolin-3-one (**3aa**):

yellow solid (34 mg, 47% yield), mp:  $123\text{--}125^{\circ}\text{C}$ ;  $^1\text{H}$  NMR (400 MHz,  $\text{CDCl}_3$ , TMS,  $25^{\circ}\text{C}$ )  $\delta = 7.86$  (s, 1H),  $7.76$  (d,  $J = 7.8$  Hz, 1H),  $7.55$  (dd,  $J = 18.6, 7.8$  Hz, 5H),  $7.38$  (q,  $J = 8.0$  Hz, 2H),  $7.28$  (t,  $J = 7.5$  Hz, 2H),  $6.96$  (d,  $J = 8.2$  Hz, 1H),  $6.81$  (t,  $J = 7.4$  Hz, 1H),  $6.22$  (s, 1H),  $4.37$  (d,  $J = 18.0$  Hz, 1H),  $3.16$  ppm (d,  $J = 18.0$  Hz, 1H);  $^{13}\text{C}$  NMR (100 MHz,  $\text{CDCl}_3$ ,  $25^{\circ}\text{C}$ )  $\delta = 200.5, 196.7, 160.3, 138.0, 137.9, 135.3, 133.7, 130.2, 128.9, 128.8, 128.4, 128.3, 127.8, 126.3, 125.8, 125.4, 119.1, 111.9, 69.2, 45.1$  ppm; IR (KBr)  $\nu = 3382, 2922, 2848, 1687, 1619, 1489, 1212, 754, 699, 516$   $\text{cm}^{-1}$ ; HRMS (ESI, TOF)  $m/z$ : calcd for  $\text{C}_{22}\text{H}_{16}\text{ClNNaO}_2$ ,  $[\text{M} + \text{Na}]^+$  384.0762, found 384.0761.

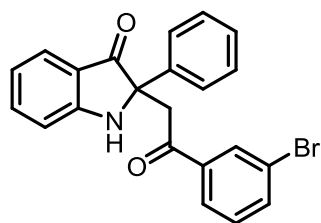

2-(2-(3-Bromophenyl)-2-oxoethyl)-2-phenylindolin-3-one (**3ab**)<sup>7</sup>:

yellow solid (41 mg, 51% yield), mp: 133–135 °C; <sup>1</sup>H NMR (400 MHz, CDCl<sub>3</sub>, TMS, 25 °C)  $\delta$  = 8.03 (s, 1H), 7.83 (d,  $J$  = 7.8 Hz, 1H), 7.69 (d,  $J$  = 8.6 Hz, 1H), 7.59–7.48 (m, 4H), 7.31 (dd,  $J$  = 14.5, 7.3 Hz, 2H), 7.25 (dd,  $J$  = 13.4, 5.9 Hz, 2H), 6.97 (d,  $J$  = 8.3 Hz, 1H), 6.82 (t,  $J$  = 7.4 Hz, 1H), 6.21 (s, 1H), 4.38 (d,  $J$  = 17.9 Hz, 1H), 3.17 ppm (d,  $J$  = 18.0 Hz, 1H); <sup>13</sup>C NMR (100 MHz, CDCl<sub>3</sub>, 25 °C)  $\delta$  = 200.4, 196.5, 160.2, 138.2, 137.9, 137.8, 136.6, 131.2, 130.3, 128.8, 127.7, 126.6, 125.7, 125.3, 123.1, 119.0, 118.2, 111.8, 69.1, 45.0 ppm.

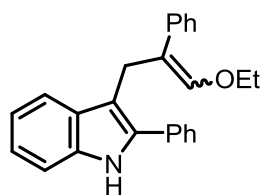

3-(3-Ethoxy-2-phenylallyl)-2-phenyl-1H-indole (**4a**): yellow oil (25

mg, 35% yield); <sup>1</sup>H NMR (400 MHz, CDCl<sub>3</sub>, TMS, 25 °C)  $\delta$  = 8.10 (s, 1H), 7.64 (d,  $J$  = 7.6 Hz, 3H), 7.57 (d,  $J$  = 7.4 Hz, 2H), 7.44 (t,  $J$  = 7.6 Hz, 2H), 7.40–7.34 (m, 2H), 7.32 (t,  $J$  = 7.6 Hz, 2H), 7.20 (q,  $J$  = 7.7 Hz, 2H), 7.12 (t,  $J$  = 7.4 Hz, 1H), 5.92 (s, 1H), 3.89 (s, 2H), 3.67 (q,  $J$  = 7.1 Hz, 2H), 1.14 ppm (t,  $J$  = 7.0 Hz, 3H); <sup>13</sup>C NMR (100 MHz, CDCl<sub>3</sub>, 25 °C)  $\delta$  = 144.9, 138.6, 136.0, 135.3, 132.9, 129.6, 128.9, 127.9, 127.8, 127.7, 127.5, 126.0, 122.3, 119.7, 119.7, 114.3, 110.7, 110.1, 68.3, 28.1, 15.3 ppm; IR (KBr)  $\nu$  = 3362, 3055, 2976, 1601, 1493, 1454, 1304, 1136, 742, 697, 500 cm<sup>-1</sup>; HRMS (ESI, TOF)  $m/z$ : calcd for C<sub>25</sub>H<sub>24</sub>NO, [M + H]<sup>+</sup> 354.1852, found 354.1855.

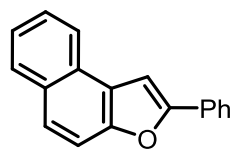

2-Phenylnaphtho[2,1-*b*]furan (**5a**)<sup>8</sup>: white solid (37 mg, 76% yield), mp:

145–147 °C; <sup>1</sup>H NMR (400 MHz, CDCl<sub>3</sub>, TMS, 25 °C)  $\delta$  = 8.17 (d,  $J$  = 8.2 Hz, 1H), 7.94 (t,  $J$  = 7.4 Hz, 3H), 7.75–7.66 (m, 2H), 7.59 (t,  $J$  = 7.1 Hz, 1H), 7.53–7.44 (m, 4H), 7.35 ppm (t,  $J$  = 7.4 Hz, 1H); <sup>13</sup>C NMR (100 MHz, CDCl<sub>3</sub>, 25 °C)  $\delta$  = 155.4, 152.4, 130.7, 130.4, 128.9, 128.8, 128.3, 127.6, 126.3, 125.2, 124.7, 124.6, 124.5, 123.5, 112.3, 100.5 ppm.

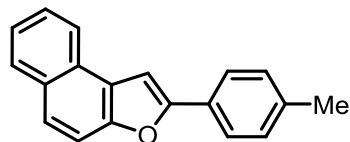

2-(*p*-Tolyl)naphtho[2,1-*b*]furan (**5b**)<sup>9</sup>: white solid (31 mg, 61%

yield), mp: 149–151 °C; <sup>1</sup>H NMR (400 MHz, CDCl<sub>3</sub>, TMS, 25 °C)  $\delta$  = 8.17 (d,  $J$  = 8.2 Hz, 1H), 7.94 (d,  $J$  = 8.1 Hz, 1H), 7.82 (d,  $J$  = 7.9 Hz, 2H), 7.73–7.66 (m, 2H), 7.59 (t,  $J$  = 7.6 Hz, 1H), 7.48 (d,  $J$  = 6.4 Hz, 2H), 7.28 (d,  $J$  = 7.8 Hz, 2H), 2.41 ppm (s, 3H); <sup>13</sup>C NMR (100 MHz, CDCl<sub>3</sub>, 25 °C)  $\delta$  = 155.7, 152.2, 138.3, 130.4, 129.6, 128.8, 127.9, 127.6, 126.2, 124.9, 124.6, 124.5, 123.5, 112.3, 99.7, 21.4 ppm.



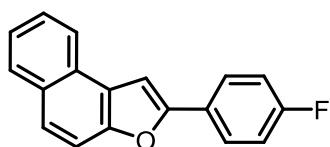

2-(4-Fluorophenyl)naphtho[2,1-*b*]furan (**5c**)<sup>10</sup>: off white solid (35 mg, 68% yield), mp: 120–122 °C; <sup>1</sup>H NMR (400 MHz, CDCl<sub>3</sub>, TMS, 25 °C)  $\delta$  = 8.15 (d, *J* = 8.1 Hz, 1H), 7.95 (d, *J* = 8.2 Hz, 1H), 7.89 (dd, *J* = 8.7, 5.4 Hz, 2H), 7.70 (q, *J* = 8.9 Hz, 2H), 7.59 (t, *J* = 7.6 Hz, 1H), 7.49 (t, *J* = 7.5 Hz, 1H), 7.44 (s, 1H), 7.16 ppm (t, *J* = 8.7 Hz, 2H); <sup>13</sup>C NMR (100 MHz, CDCl<sub>3</sub>, 25 °C)  $\delta$  = 164.0 (d, <sup>1</sup>*J*<sub>C-F</sub> = 247 Hz), 154.5, 152.3, 130.5, 128.8, 127.6, 127.0 (d, <sup>4</sup>*J*<sub>C-F</sub> = 3 Hz), 126.5 (d, <sup>3</sup>*J*<sub>C-F</sub> = 8 Hz), 126.3, 125.2, 124.6, 124.5, 123.4, 116.1 (d, <sup>2</sup>*J*<sub>C-F</sub> = 22 Hz), 112.2, 100.2 ppm; <sup>19</sup>F NMR (377 MHz, CDCl<sub>3</sub>, 25 °C)  $\delta$  = -112.8 (m, 1F) ppm.

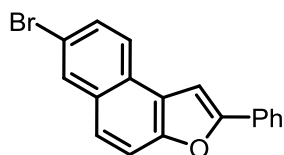

7-Bromo-2-phenylnaphtho[2,1-*b*]furan (**5d**)<sup>8</sup>: pale yellow solid (50 mg, 79% yield), mp: 115–117 °C; <sup>1</sup>H NMR (400 MHz, CDCl<sub>3</sub>, TMS, 25 °C)  $\delta$  = 8.09 (d, *J* = 2.0 Hz, 1H), 8.02 (d, *J* = 8.7 Hz, 1H), 7.91 (d, *J* = 7.1 Hz, 2H), 7.70 (d, *J* = 8.9 Hz, 1H), 7.65 (dd, *J* = 8.7, 2.0 Hz, 1H), 7.61 (d, *J* = 8.9 Hz, 1H), 7.50–7.44 (m, 3H), 7.37 ppm (t, *J* = 7.4 Hz, 1H); <sup>13</sup>C NMR (100 MHz, CDCl<sub>3</sub>, 25 °C)  $\delta$  = 155.9, 152.4, 131.7, 130.8, 130.4, 129.4, 128.9, 128.5, 126.1, 125.2, 124.8, 124.6, 124.1, 118.2, 113.4, 100.2 ppm.

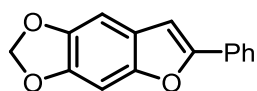

4,5-Methylenedioxy-2-phenylbenzofuran (**5e**)<sup>11</sup>: white solid (15 mg, 32% yield), mp: 159–161 °C; <sup>1</sup>H NMR (400 MHz, CDCl<sub>3</sub>, TMS, 25 °C)  $\delta$  = 7.77 (d, *J* = 7.1 Hz, 2H), 7.42 (t, *J* = 7.8 Hz, 2H), 7.30 (t, *J* = 7.4 Hz, 1H), 7.02 (s, 1H), 6.94 (s, 1H), 6.90 (s, 1H), 5.99 ppm (s, 2H); <sup>13</sup>C NMR (100 MHz, CDCl<sub>3</sub>, 25 °C)  $\delta$  = 155.5, 150.2, 146.1, 144.6, 130.6, 128.8, 128.0, 124.3, 122.5, 101.8, 101.3, 99.3, 93.5 ppm.

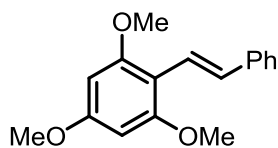

1,3,5-Trimethoxy-2-styrylbenzene (**7a**)<sup>12</sup>: colorless oil (38 mg, 72% yield); <sup>1</sup>H NMR (400 MHz, CDCl<sub>3</sub>, TMS, 25 °C)  $\delta$  = 7.51 (d, *J* = 7.5 Hz, 2H), 7.46 (d, *J* = 16.7 Hz, 1H), 7.39 (d, *J* = 16.6 Hz, 1H), 7.31 (t, *J* = 7.6 Hz, 2H), 7.18 (t, *J* = 7.4 Hz, 1H), 6.17 (s, 2H), 3.88 (s, 6H), 3.83 ppm (s, 3H); <sup>13</sup>C NMR (100 MHz, CDCl<sub>3</sub>, 25 °C)  $\delta$  = 160.3, 159.6, 139.8, 130.0, 128.5, 126.6, 126.3, 120.0, 108.3, 90.9, 55.9, 55.5 ppm.

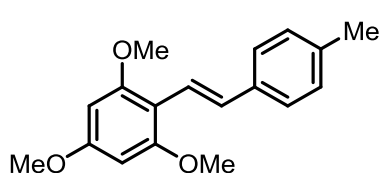

1,3,5-Trimethoxy-2-(4-methylstyryl)benzene (**7b**)<sup>13</sup>: white solid (42 mg, 74% yield), mp: 93–95 °C; <sup>1</sup>H NMR (400 MHz, CDCl<sub>3</sub>, TMS, 25 °C)  $\delta$  = 7.46–7.31 (m, 4H), 7.12 (d, *J* = 7.7 Hz, 2H), 6.16 (s, 2H), 3.87 (s, 6H), 3.83 (s, 3H), 2.33 ppm (s, 3H); <sup>13</sup>C NMR (100 MHz, CDCl<sub>3</sub>,

25 °C)  $\delta$  = 160.0, 159.4, 136.9, 136.2, 129.9, 129.1, 126.1, 118.9, 108.3, 90.9, 55.8, 55.3, 21.2 ppm.

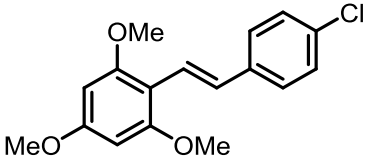 2-(4-Chlorostyryl)-1,3,5-trimethoxybenzene (**7c**)<sup>13</sup>: white solid (34 mg, 57% yield), mp: 97–99 °C; <sup>1</sup>H NMR (400 MHz, CDCl<sub>3</sub>, TMS, 25 °C)  $\delta$  = 7.40 (dd,  $J$  = 14.5, 6.6 Hz, 4H), 7.27 (d,  $J$  = 8.5 Hz, 2H), 6.16 (s, 2H), 3.88 (s, 6H), 3.84 ppm (s, 3H); <sup>13</sup>C NMR (100 MHz, CDCl<sub>3</sub>, 25 °C)  $\delta$  = 160.4, 159.6, 138.2, 131.9, 128.51, 128.46, 127.3, 120.5, 107.8, 90.8, 55.8, 55.3 ppm.

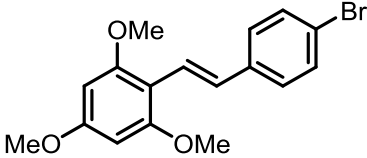 (*E*)-2-(4-Bromostyryl)-1,3,5-trimethoxybenzene (**7d**)<sup>13</sup>: white solid (43 mg, 63% yield), mp: 94–96 °C; <sup>1</sup>H NMR (400 MHz, CDCl<sub>3</sub>, TMS, 25 °C)  $\delta$  = 7.42 (d,  $J$  = 8.5 Hz, 2H), 7.39–7.34 (m, 4H), 6.16 (s, 2H), 3.88 (s, 6H), 3.84 ppm (s, 3H); <sup>13</sup>C NMR (100 MHz, CDCl<sub>3</sub>, 25 °C)  $\delta$  = 160.5, 159.6, 138.7, 131.4, 128.5, 127.7, 120.6, 120.0, 107.8, 90.8, 55.8, 55.3 ppm.

## 9 References

- (1) S. K. Bhunia, A. Polley, R. Natarajan and R. Jana, *Chem. -Eur. J.*, 2015, **21**, 16786–16791.
- (2) W. F. Bailey, D. P. Reed, D. R. Clark and G. N. Kapur, *Org. Lett.*, 2001, **3**, 1865–1868.
- (3) M. Jiang, L. Feng, J. Feng and P. Jiao, *Org. Lett.*, 2017, **19**, 2210–2213.
- (4) C. V. Suneel Kumar and C. V. Ramana, *Org. Lett.*, 2015, **17**, 2870–2873.
- (5) Y. Shao, Y.-M. Zeng, J.-Y. Ji, X.-Q. Sun, H.-T. Yang and C.-B. Miao, *J. Org. Chem.*, 2016, **81**, 12443–12450.
- (6) J. Liu, J. Huang, K. Jia, T. Du, C. Zhao, R. Zhu and X. Liu, *Synthesis*, 2019, **52**, 763–768.
- (7) X. Zhang, P. Li, C. Lyu, W. Yong, J. Li, X. Pan, X. Zhu and W. Rao, *Adv. Synth. Catal.*, 2017, **359**, 4147–4152.
- (8) U. Sharma, T. Naveen, A. Maji, S. Manna and D. Maiti, *Angew. Chem. Int. Ed.*, 2013, **52**, 12669–12673.
- (9) Z. Wang, C. Pan, J. Yu, Y. Zhou and M. M. Zhou, *Synlett*, 2006, **2006**, 1657–1662.
- (10) L. Liu, X. Ji, J. Dong, Y. Zhou and S. F. Yin, *Org. Lett.*, 2016, **18**, 3138–3141.
- (11) X. F. Duan, J. Zeng, Z. B. Zhang and G.-F. Zi, *J. Org. Chem.*, 2007, **72**, 10283–10286.
- (12) A. Hossian, S. K. Bhunia and R. Jana, *J. Org. Chem.*, 2016, **81**, 2521–2533.
- (13) R. Mudududdla, R. Sharma, S. Abbat, P. V. Bharatam, R. A. Vishwakarma and S. B. Bharate, *Chem. Commun.*, 2014, **50**, 12076–12079.

# 10 Copies of NMR spectra

3a

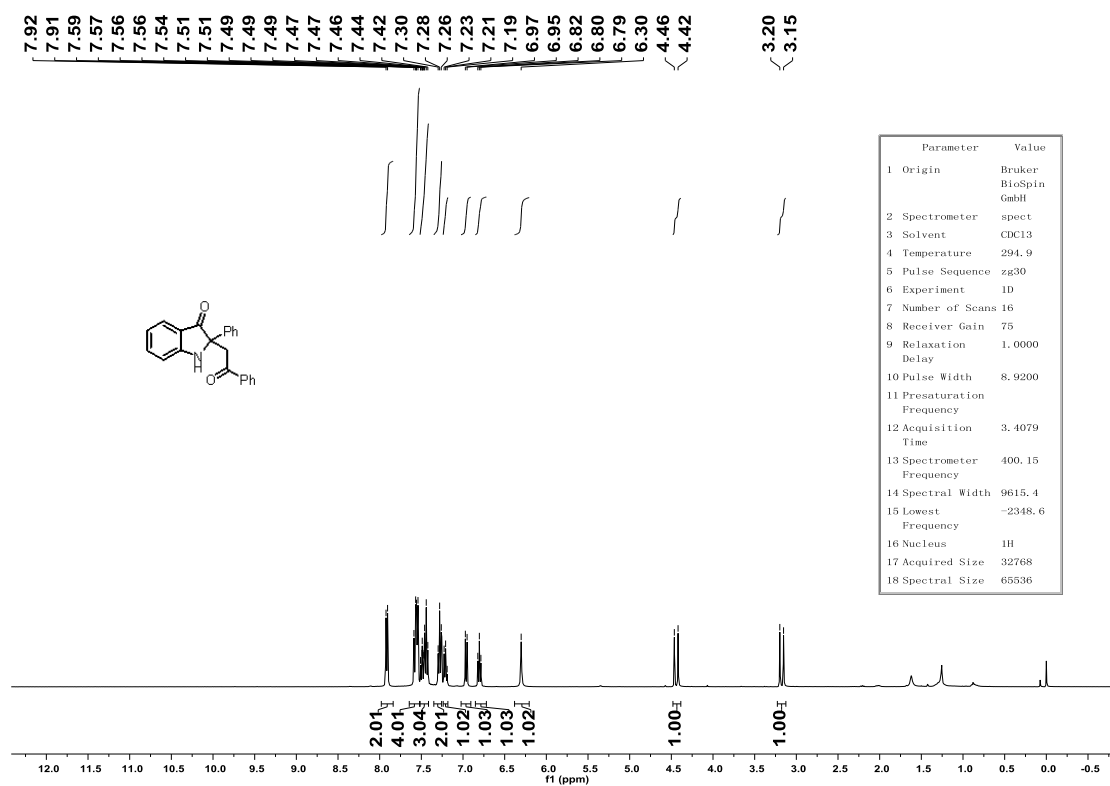

| Parameter                  | Value               |
|----------------------------|---------------------|
| 1 Origin                   | Bruker BioSpin GmbH |
| 2 Spectrometer             | spect               |
| 3 Solvent                  | CDCl3               |
| 4 Temperature              | 294.9               |
| 5 Pulse Sequence           | zg30                |
| 6 Experiment               | 1D                  |
| 7 Number of Scans          | 16                  |
| 8 Receiver Gain            | 75                  |
| 9 Relaxation Delay         | 1.0000              |
| 10 Pulse Width             | 8.9200              |
| 11 Presaturation Frequency |                     |
| 12 Acquisition Time        | 3.4079              |
| 13 Spectrometer Frequency  | 400.15              |
| 14 Spectral Width          | 9615.4              |
| 15 Lowest Frequency        | -2348.6             |
| 16 Nucleus                 | 1H                  |
| 17 Acquired Size           | 32768               |
| 18 Spectral Size           | 65536               |

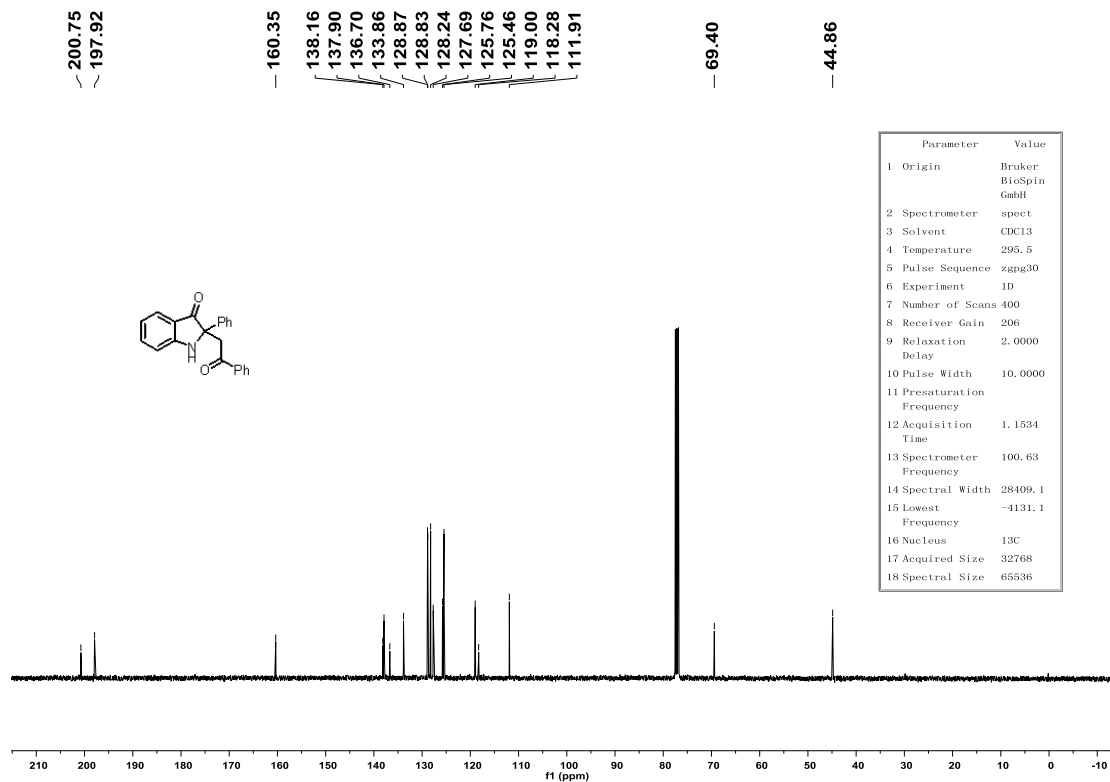

| Parameter                  | Value               |
|----------------------------|---------------------|
| 1 Origin                   | Bruker BioSpin GmbH |
| 2 Spectrometer             | spect               |
| 3 Solvent                  | CDCl3               |
| 4 Temperature              | 295.5               |
| 5 Pulse Sequence           | zgpg30              |
| 6 Experiment               | 1D                  |
| 7 Number of Scans          | 400                 |
| 8 Receiver Gain            | 206                 |
| 9 Relaxation Delay         | 2.0000              |
| 10 Pulse Width             | 10.0000             |
| 11 Presaturation Frequency |                     |
| 12 Acquisition Time        | 1.1534              |
| 13 Spectrometer Frequency  | 100.63              |
| 14 Spectral Width          | 28409.1             |
| 15 Lowest Frequency        | -4131.1             |
| 16 Nucleus                 | 13C                 |
| 17 Acquired Size           | 32768               |
| 18 Spectral Size           | 65536               |

3b

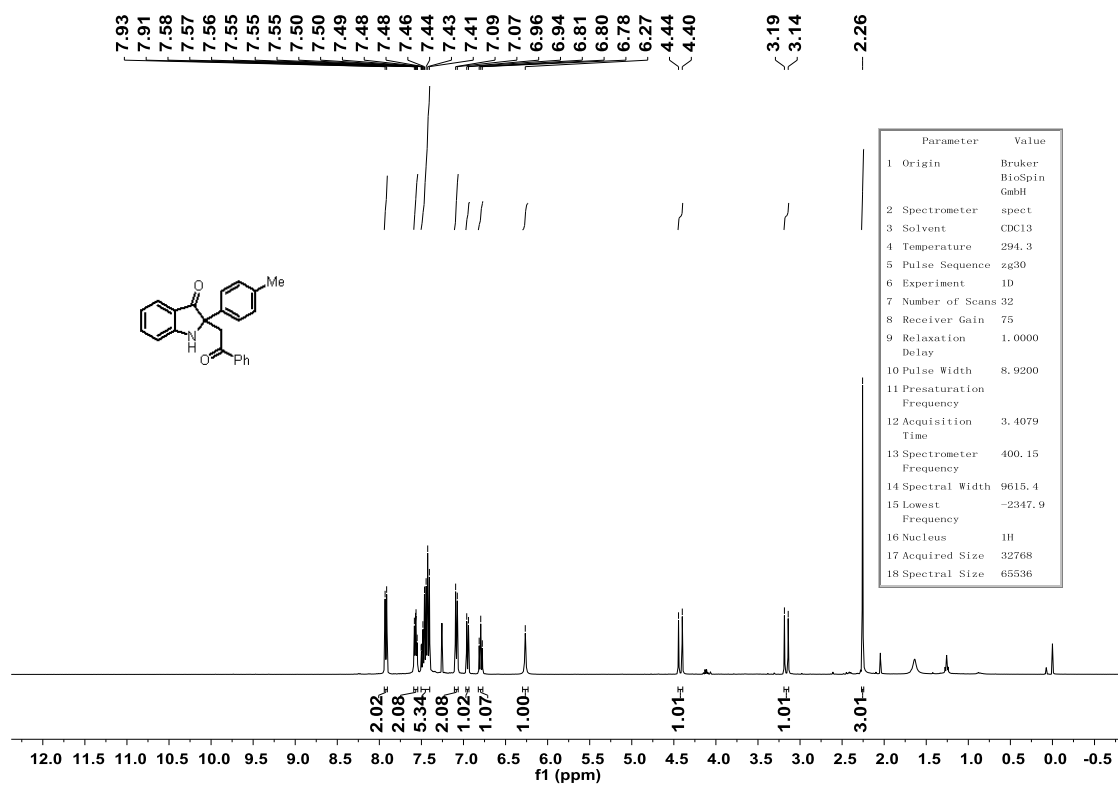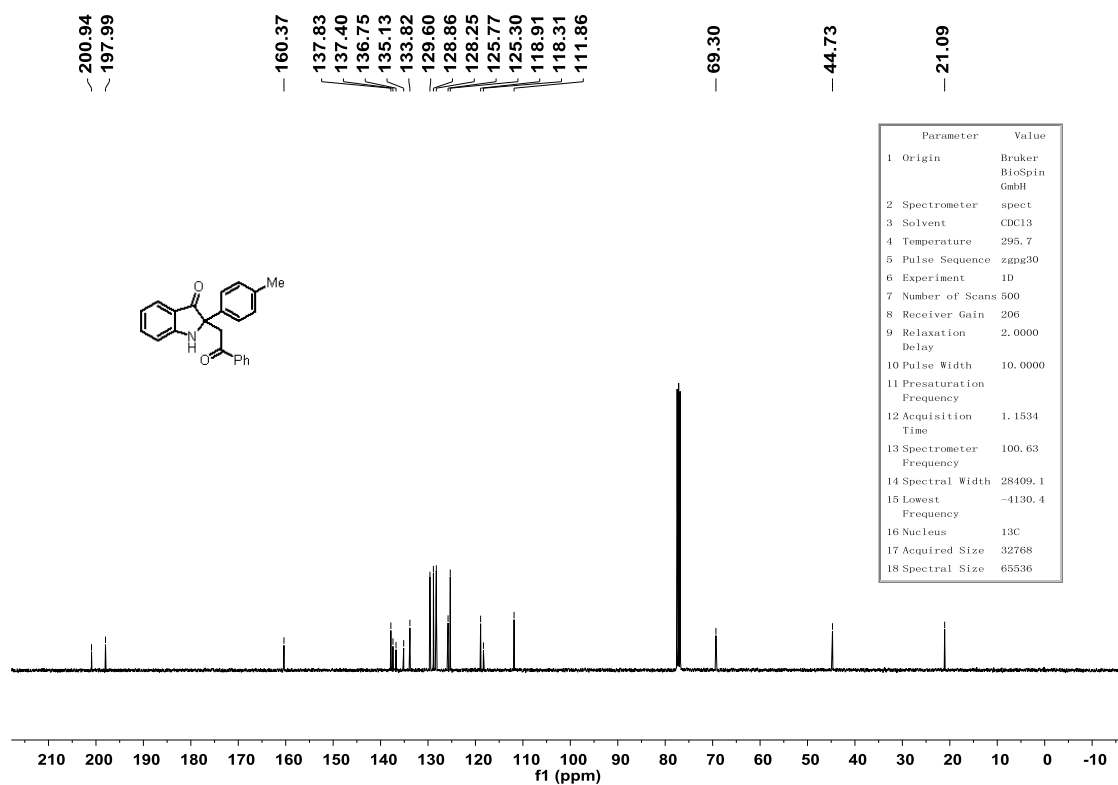

3c

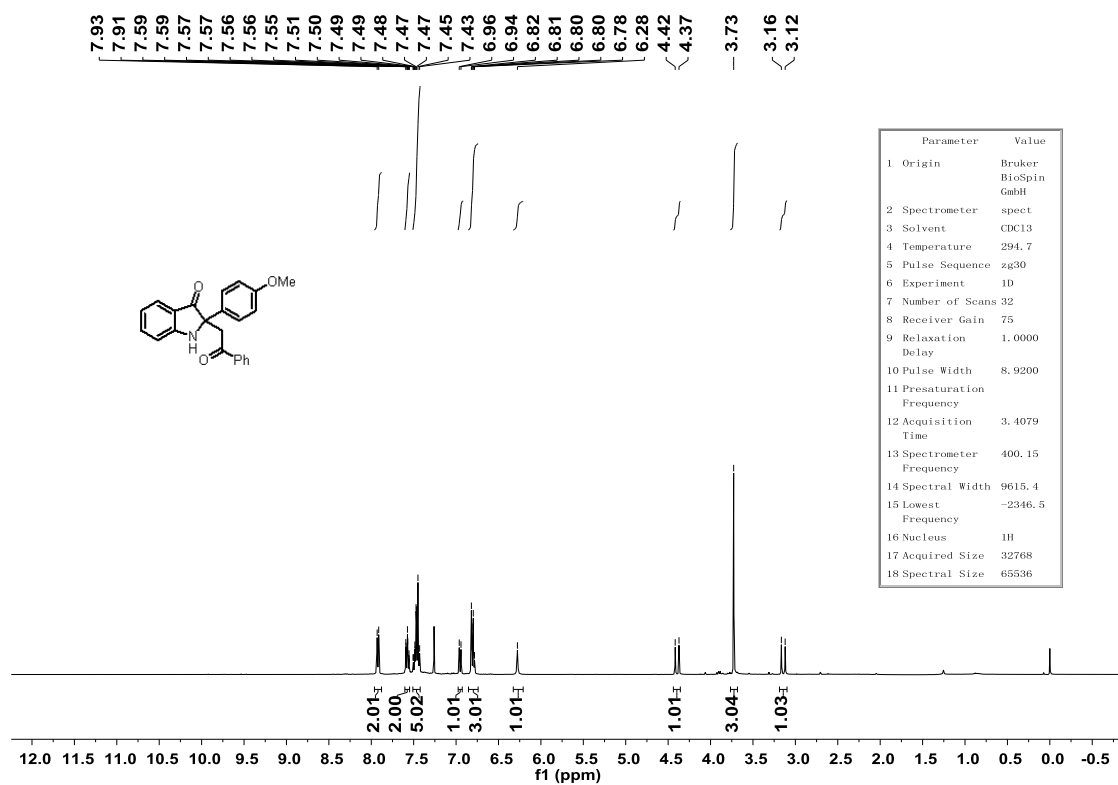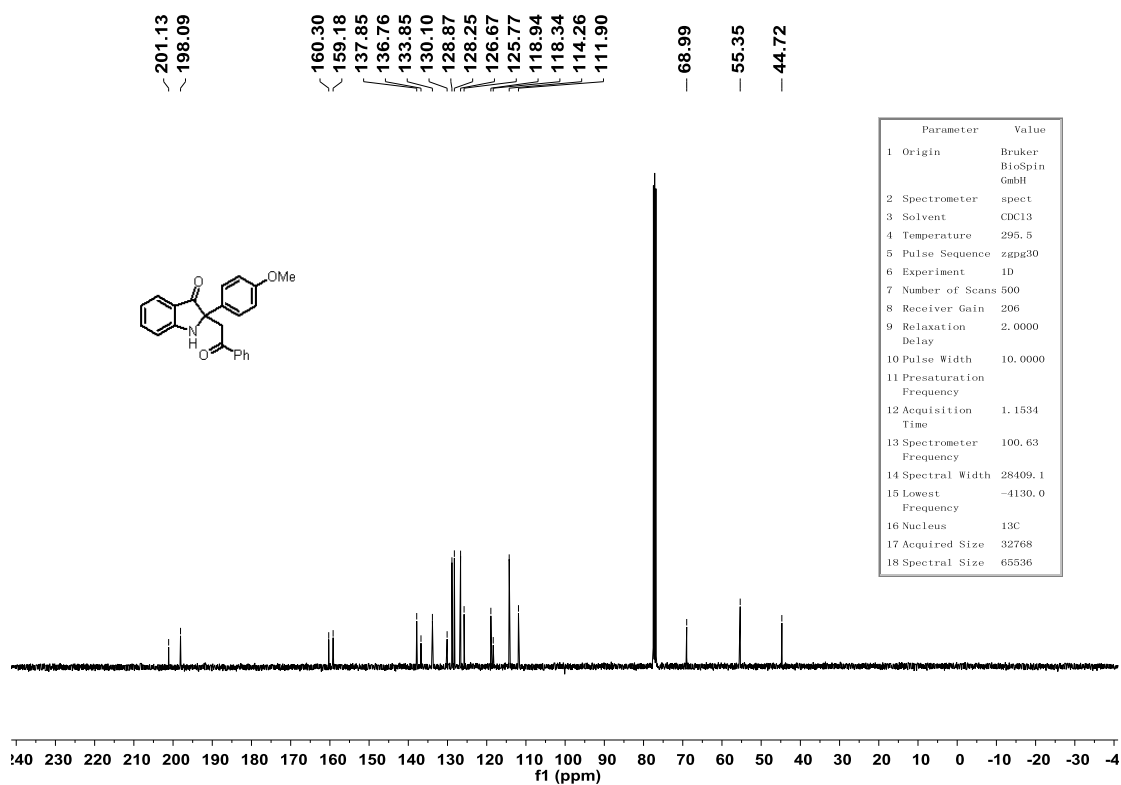

3d

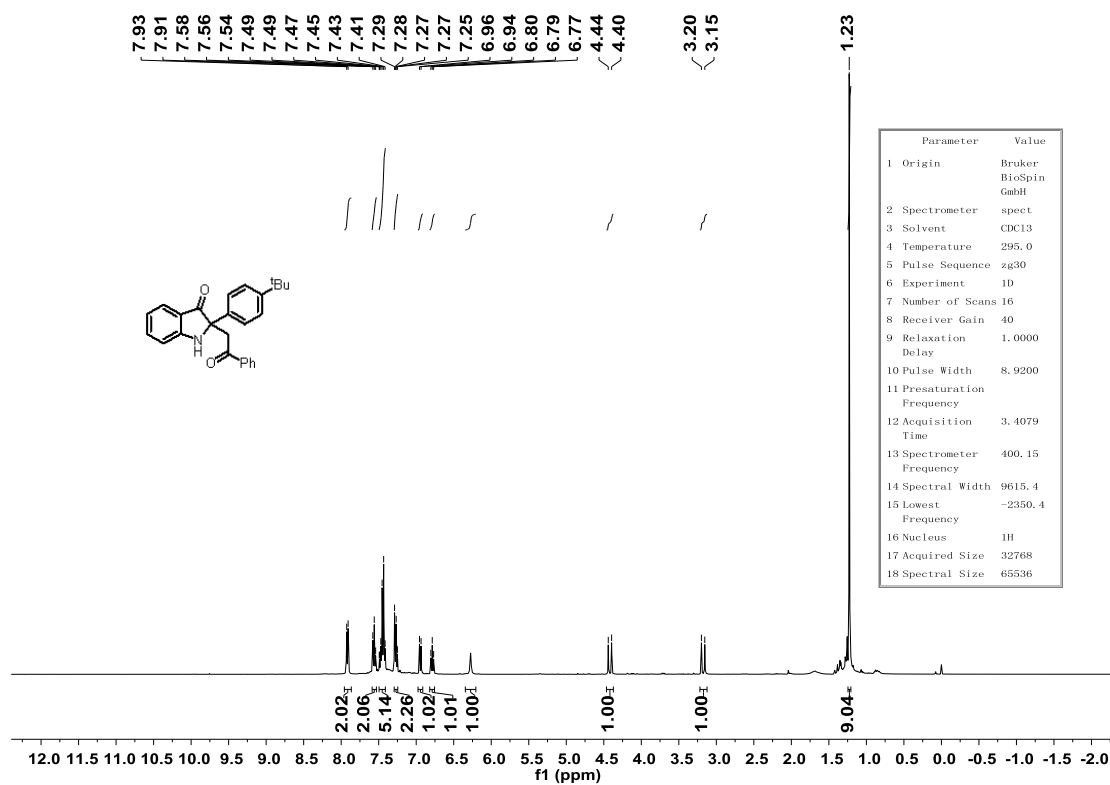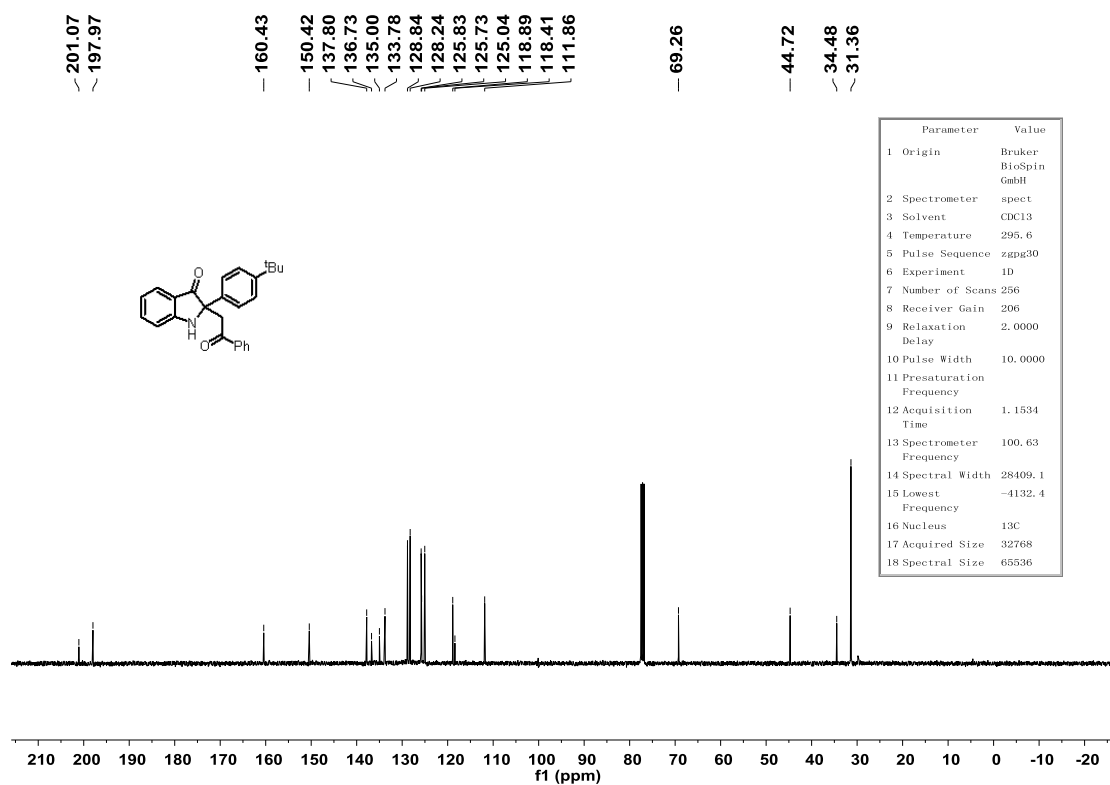

3e

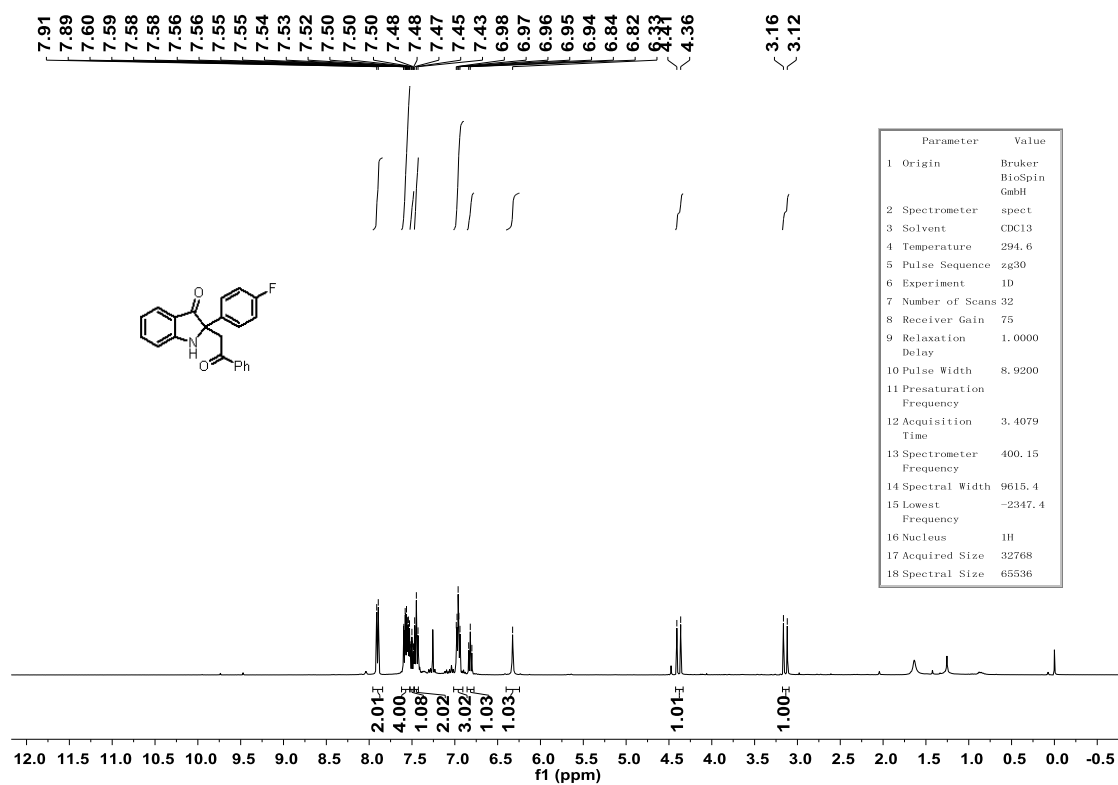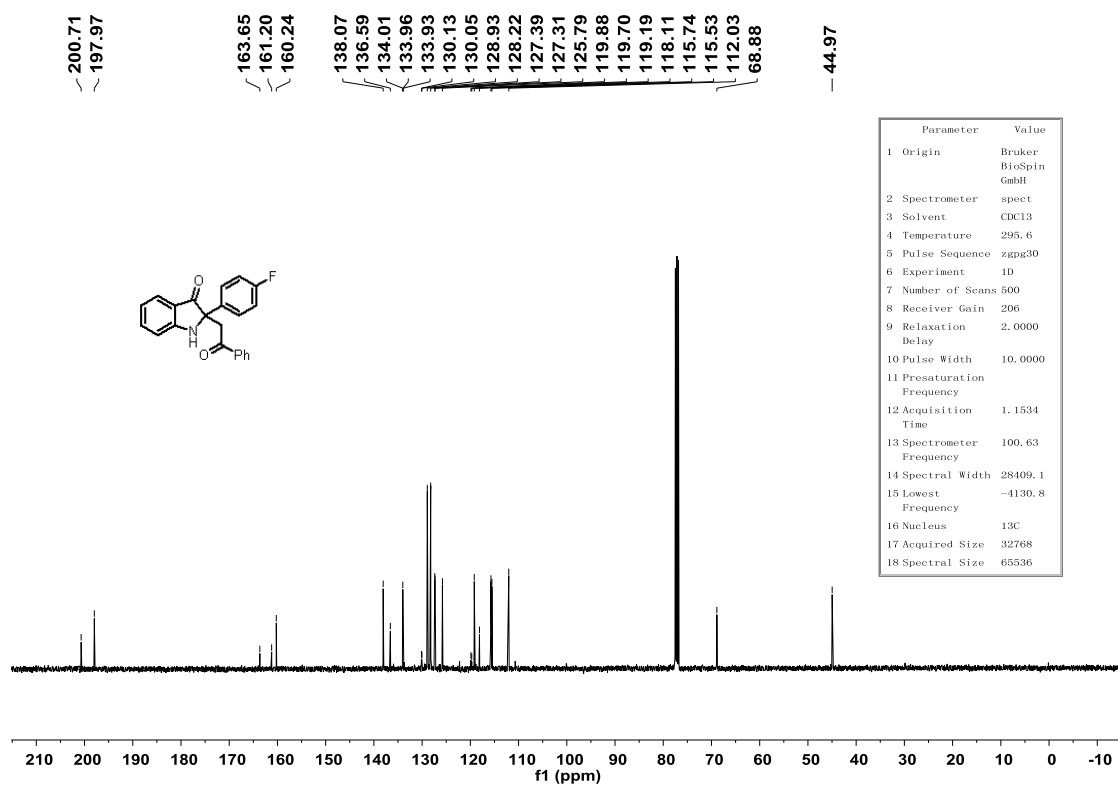



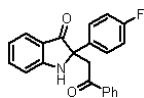

-115.34  
-115.35  
-115.36  
-115.37  
-115.38  
-115.39  
-115.41

| Parameter                  | Value               |
|----------------------------|---------------------|
| 1 Origin                   | Bruker BioSpin GmbH |
| 2 Spectrometer             | spect               |
| 3 Solvent                  | CDCl3               |
| 4 Temperature              | 295.3               |
| 5 Pulse Sequence           | zgfgqn              |
| 6 Experiment               | 1D                  |
| 7 Number of Scans          | 64                  |
| 8 Receiver Gain            | 206                 |
| 9 Relaxation Delay         | 1.5000              |
| 10 Pulse Width             | 14.0000             |
| 11 Presaturation Frequency |                     |
| 12 Acquisition Time        | 0.5767              |
| 13 Spectrometer Frequency  | 376.50              |
| 14 Spectral Width          | 113636.4            |
| 15 Lowest Frequency        | -75644.0            |
| 16 Nucleus                 | 19F                 |
| 17 Acquired Size           | 65536               |
| 18 Spectral Size           | 131072              |

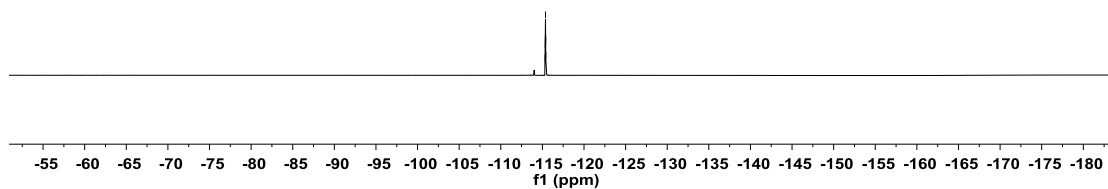

3f

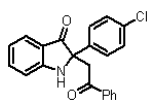

7.91  
7.89  
7.60  
7.59  
7.58  
7.57  
7.56  
7.56  
7.52  
7.50  
7.48  
7.48  
7.47  
7.45  
7.43  
7.25  
7.23  
6.97  
6.95  
6.84  
6.82  
6.80  
6.31  
4.41  
4.36  
3.17  
3.13

| Parameter                  | Value               |
|----------------------------|---------------------|
| 1 Origin                   | Bruker BioSpin GmbH |
| 2 Spectrometer             | spect               |
| 3 Solvent                  | CDCl3               |
| 4 Temperature              | 294.3               |
| 5 Pulse Sequence           | zg30                |
| 6 Experiment               | 1D                  |
| 7 Number of Scans          | 32                  |
| 8 Receiver Gain            | 75                  |
| 9 Relaxation Delay         | 1.0000              |
| 10 Pulse Width             | 8.9200              |
| 11 Presaturation Frequency |                     |
| 12 Acquisition Time        | 3.4079              |
| 13 Spectrometer Frequency  | 400.15              |
| 14 Spectral Width          | 9615.4              |
| 15 Lowest Frequency        | -2347.4             |
| 16 Nucleus                 | 1H                  |
| 17 Acquired Size           | 32768               |
| 18 Spectral Size           | 65536               |

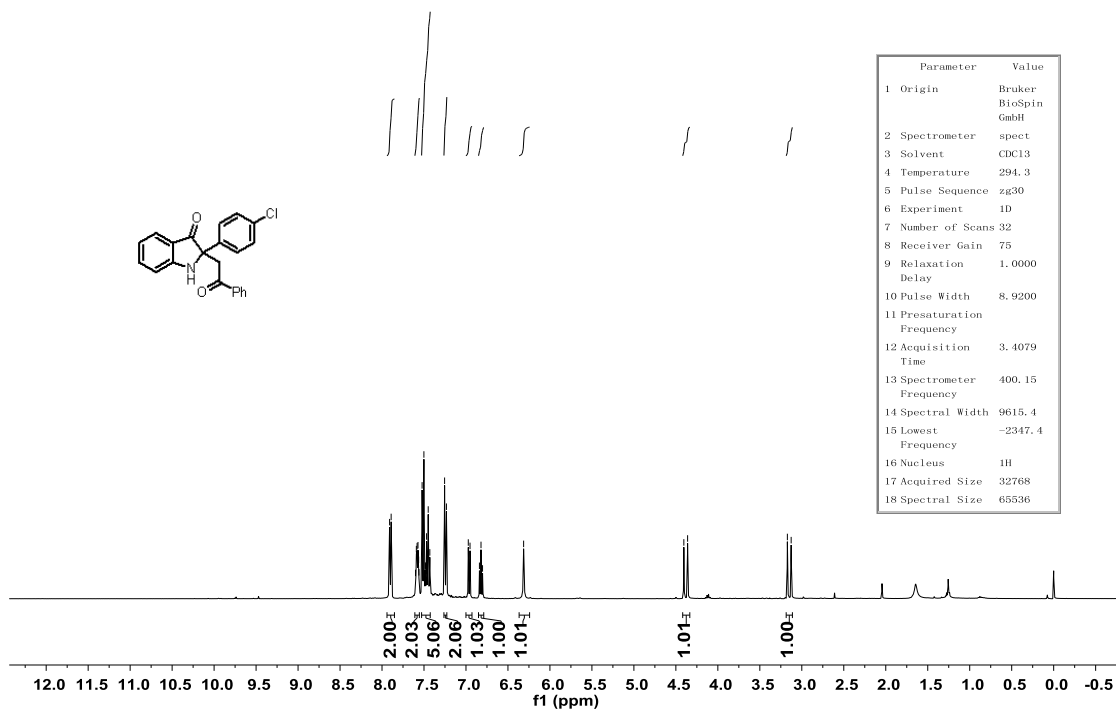

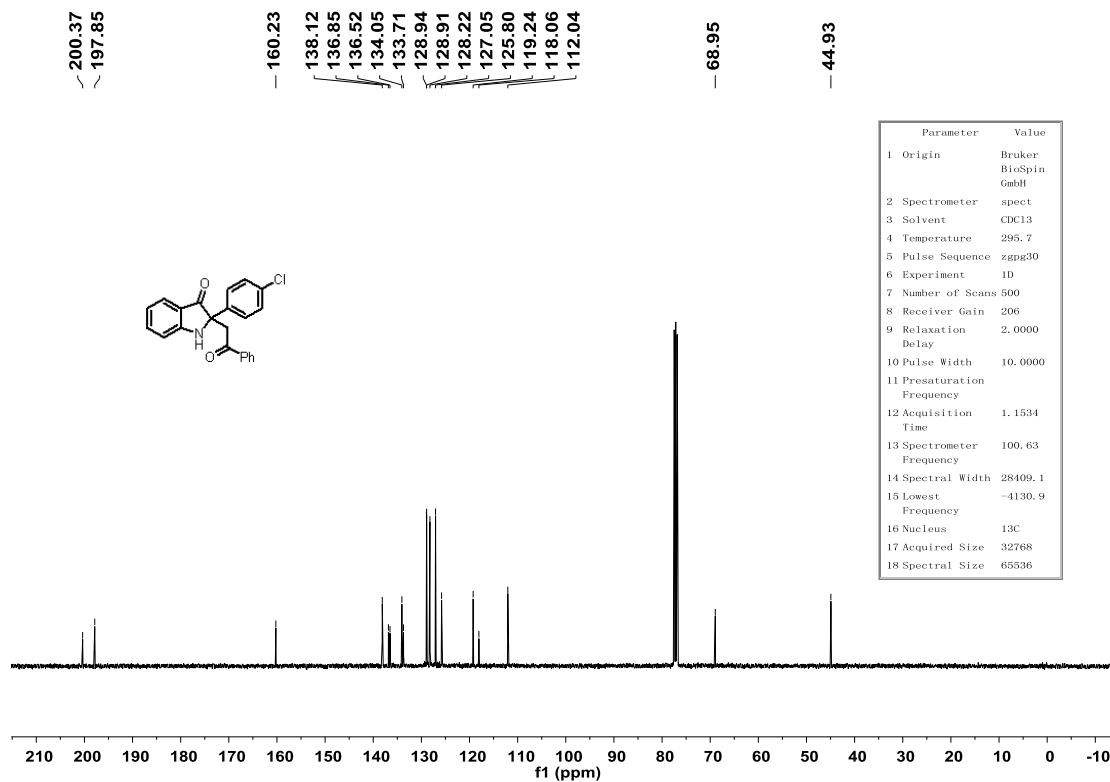

3g

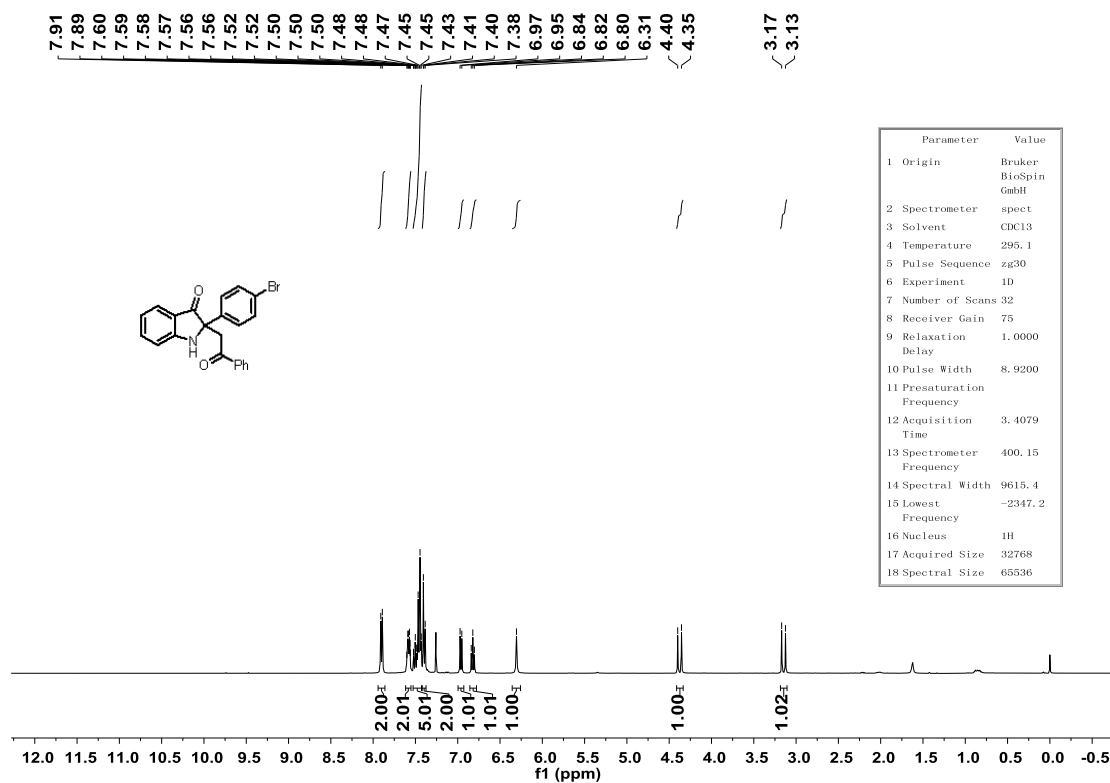

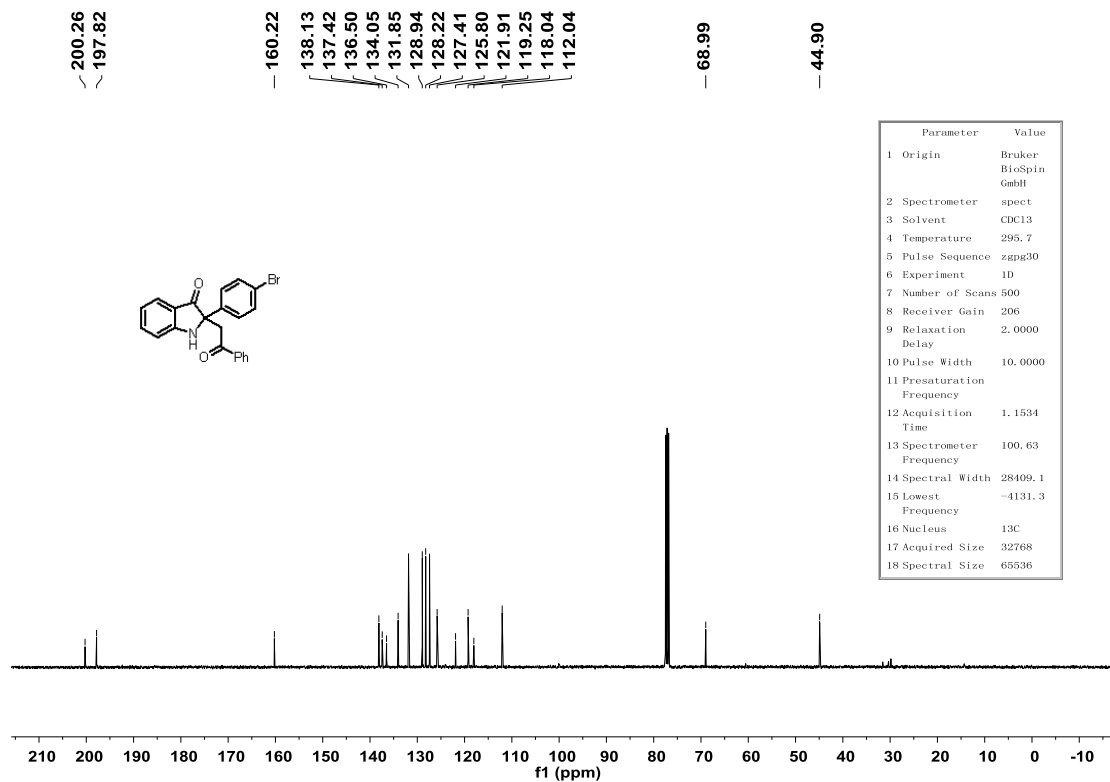

3h

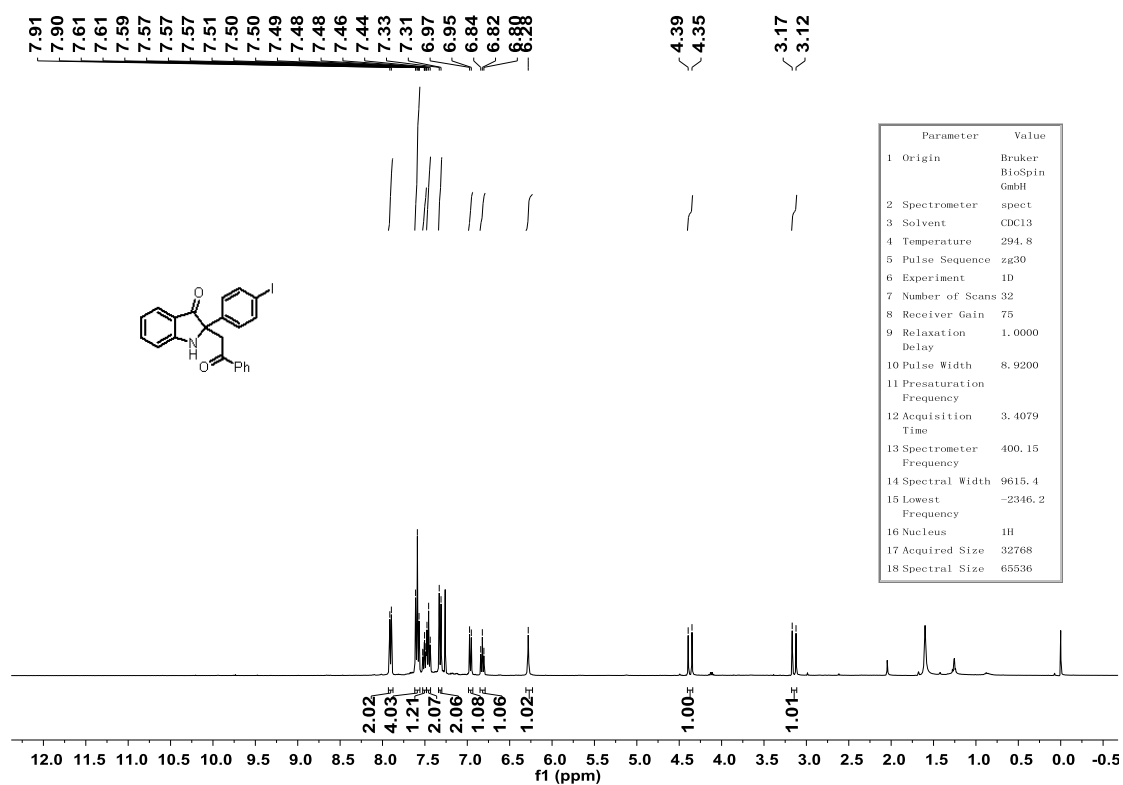

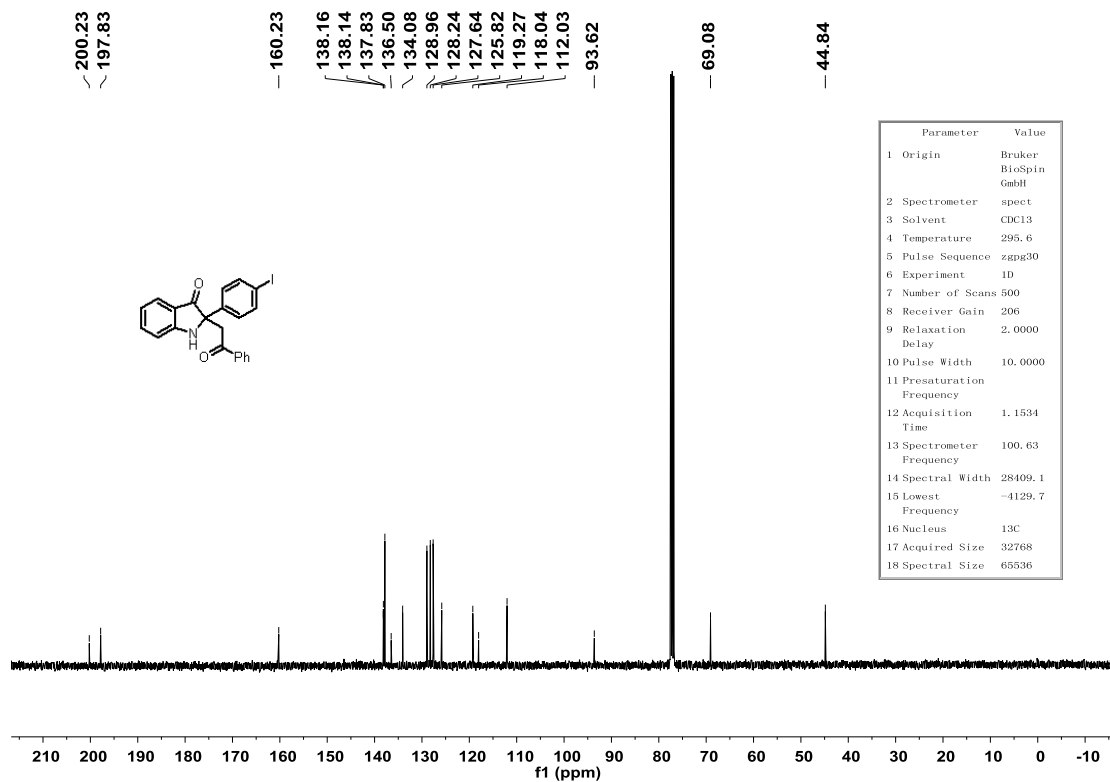

3i

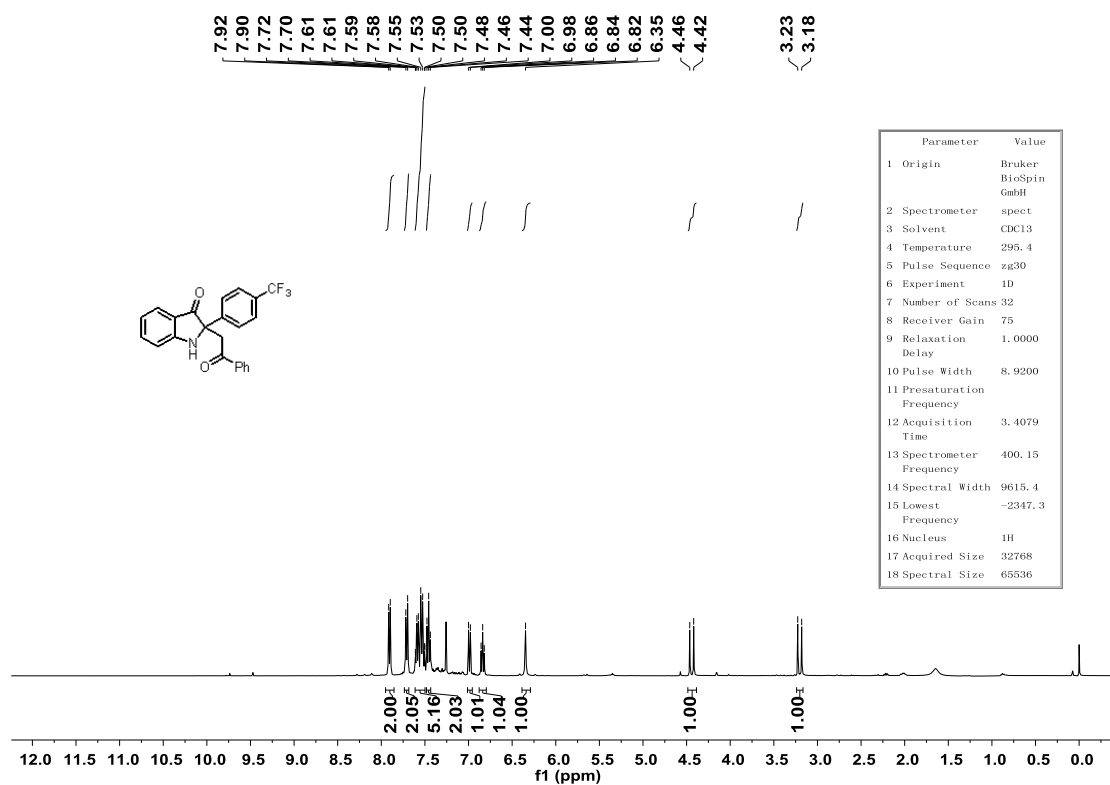

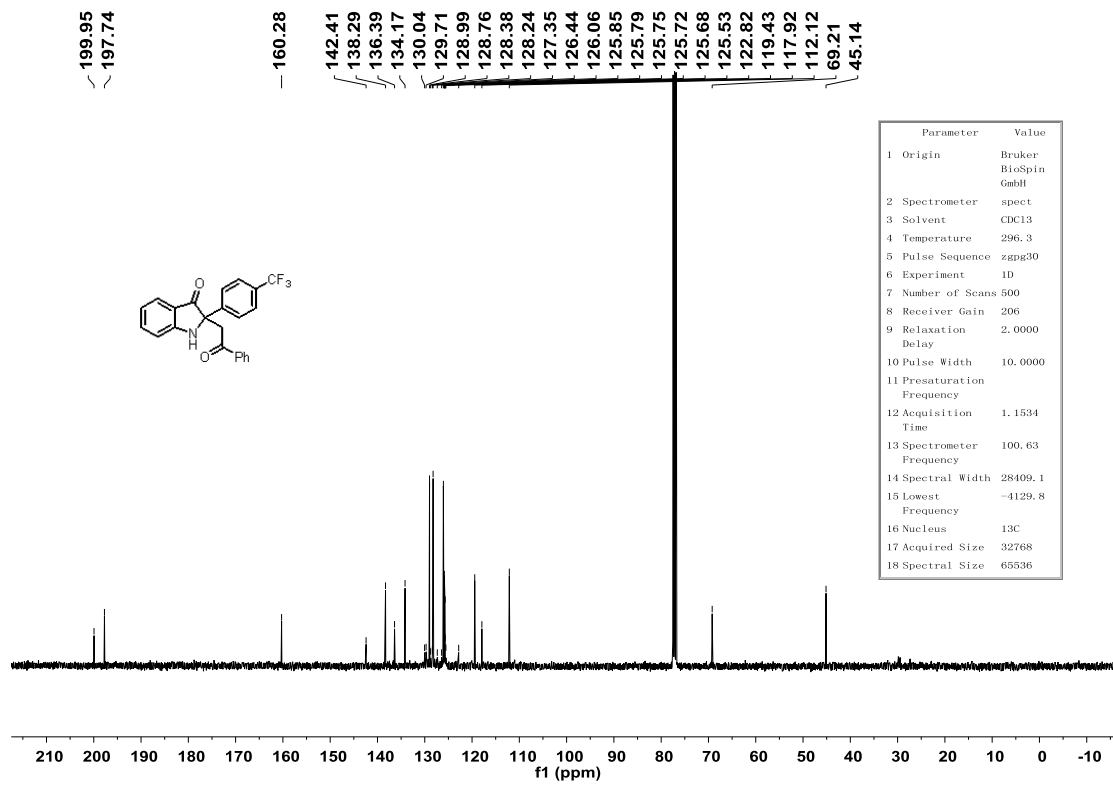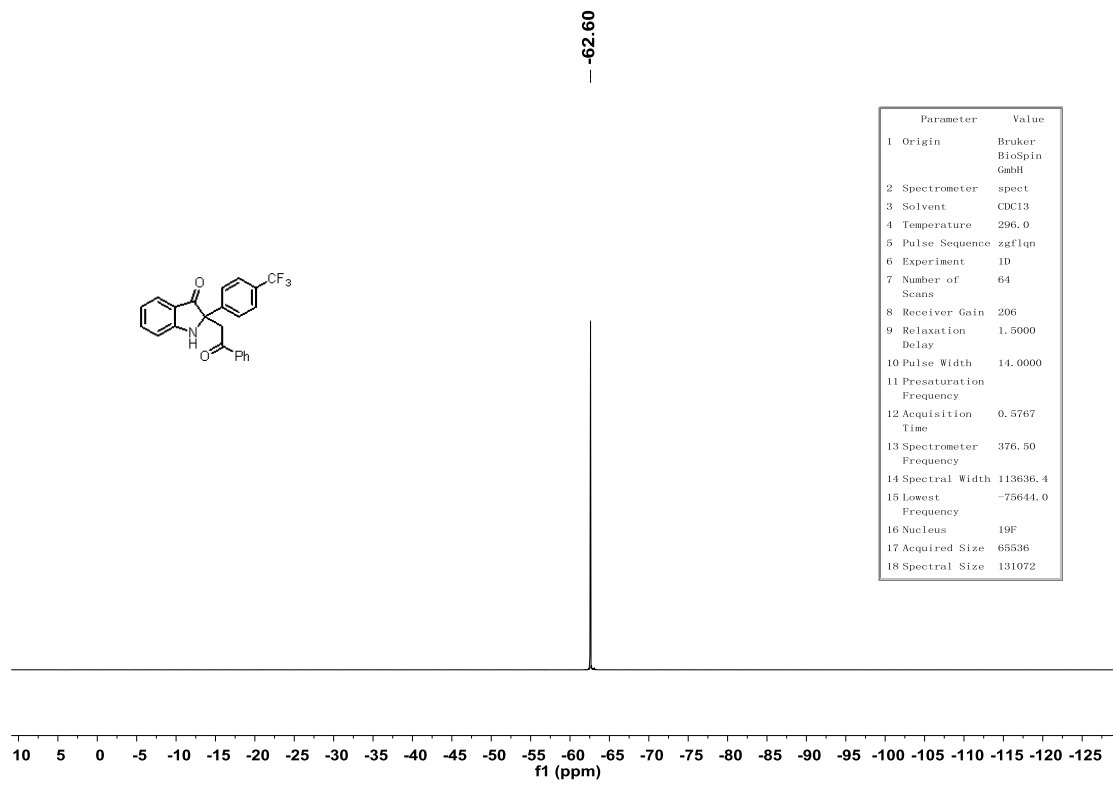

3j

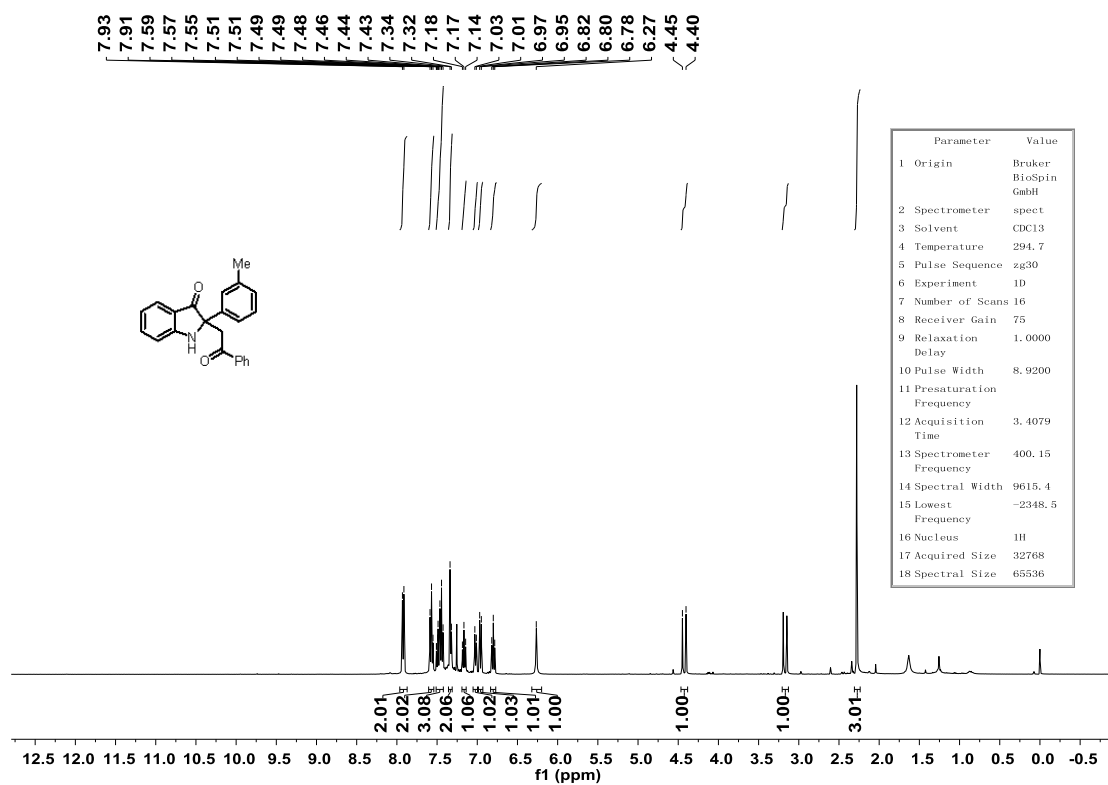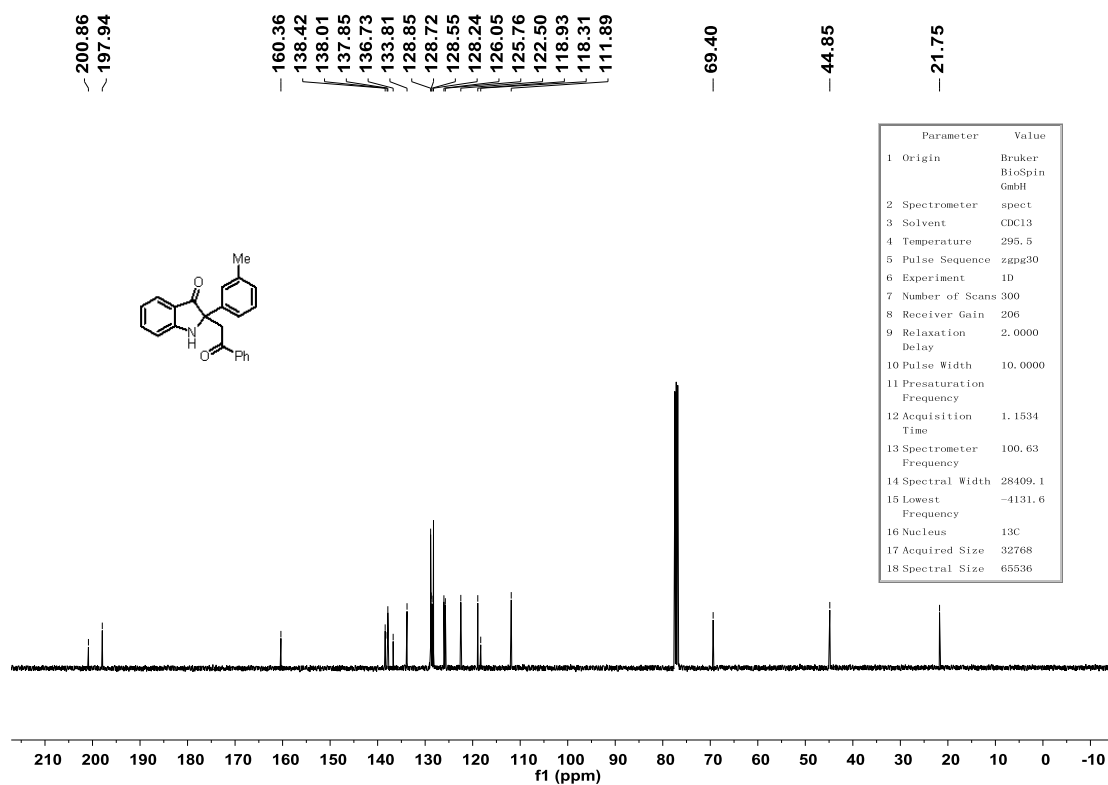

3k

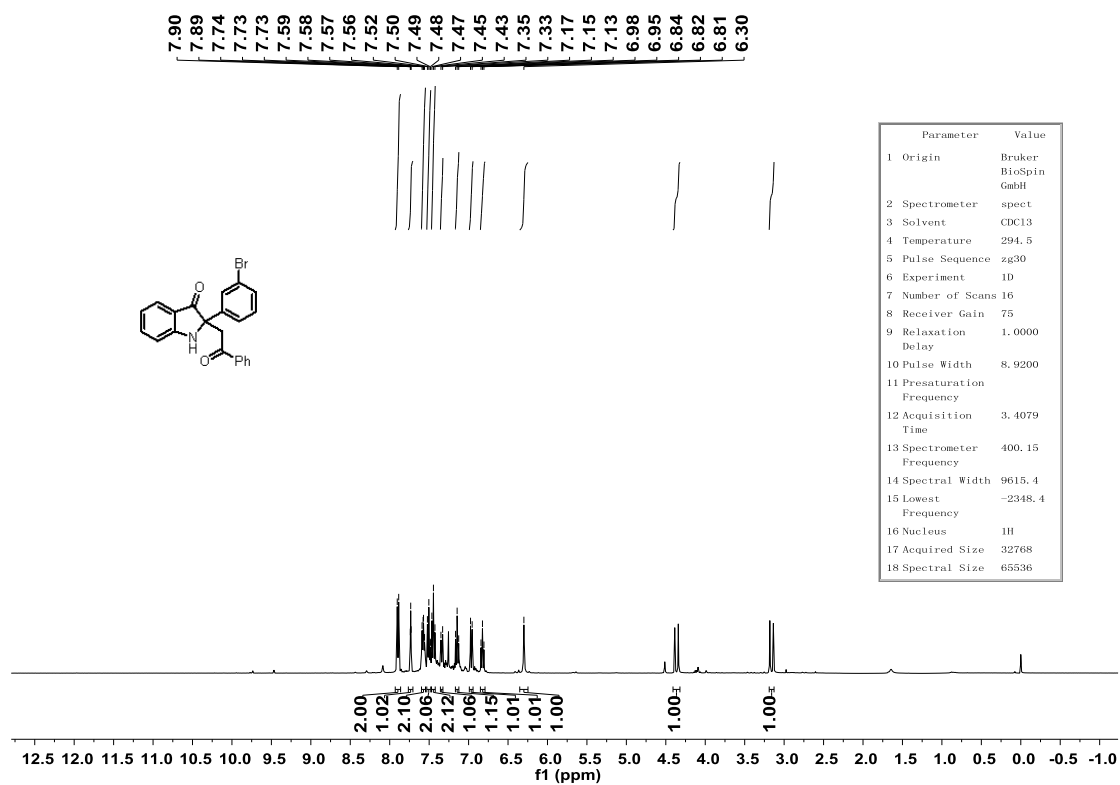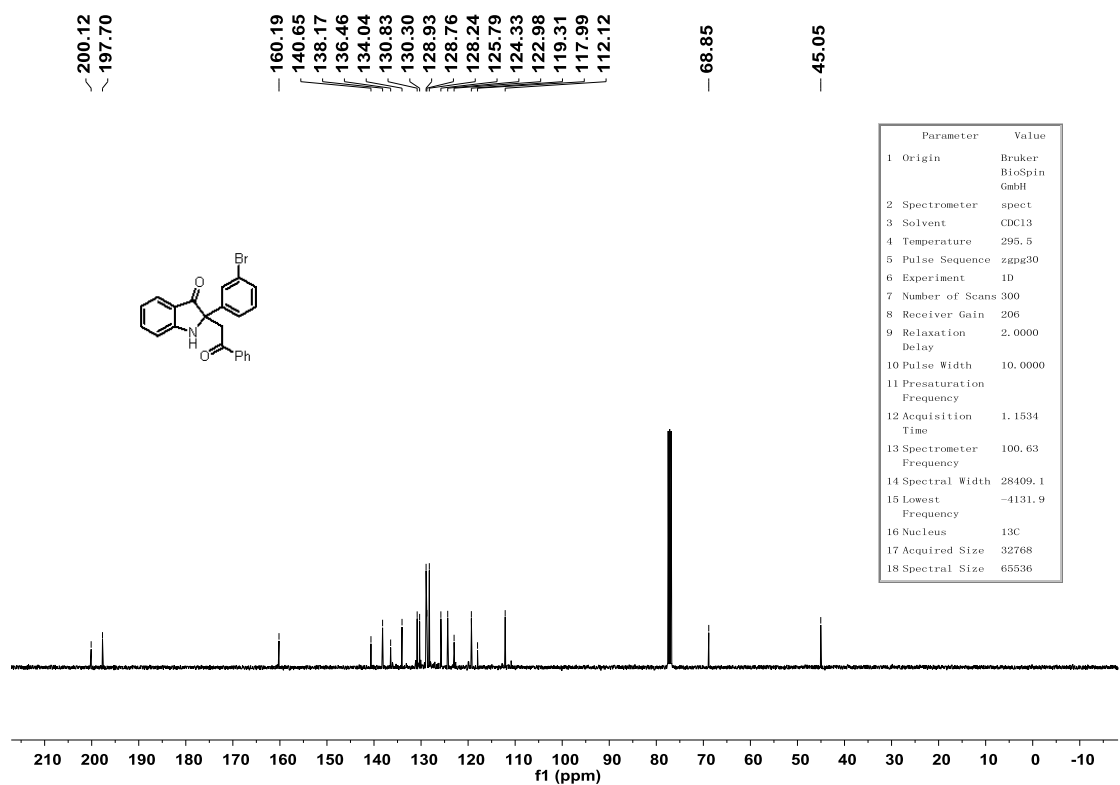

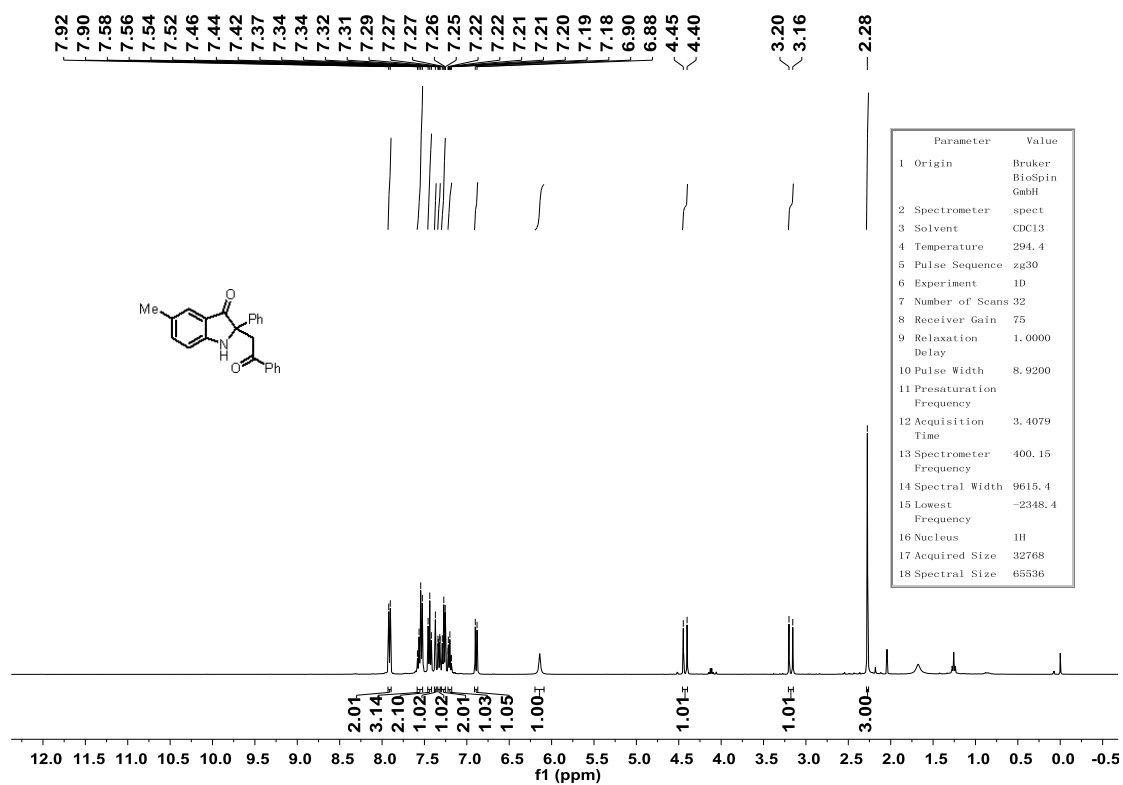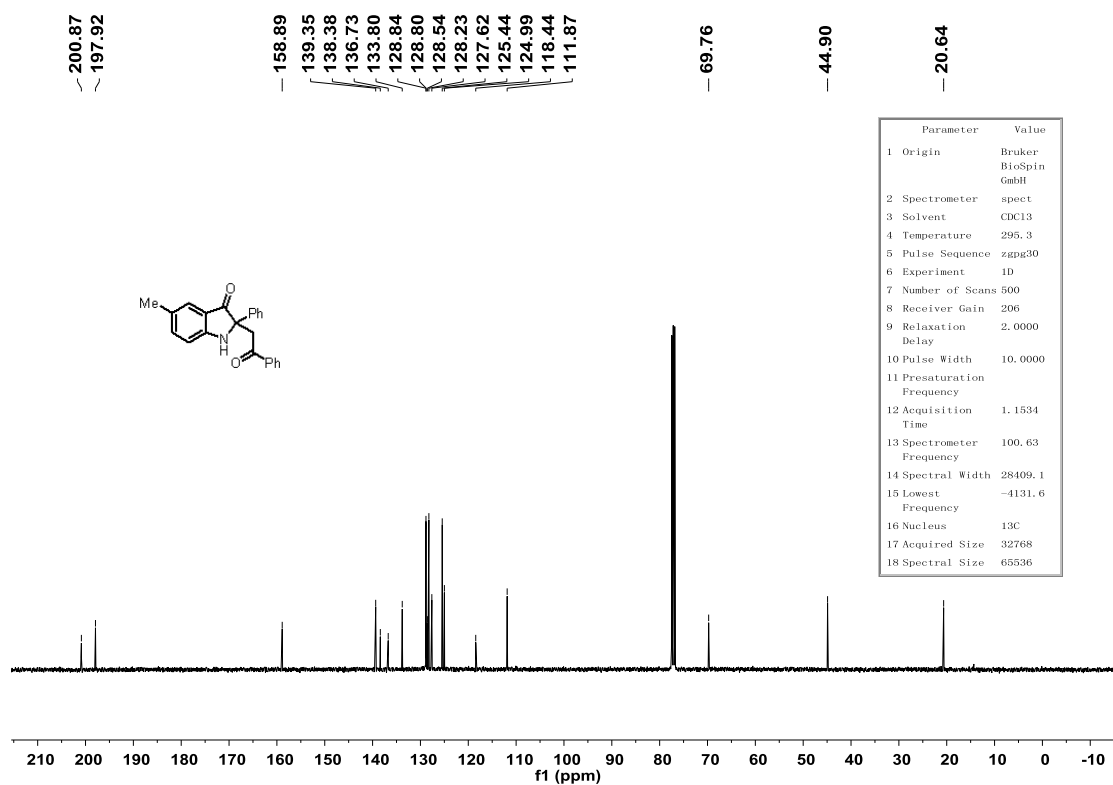



3m

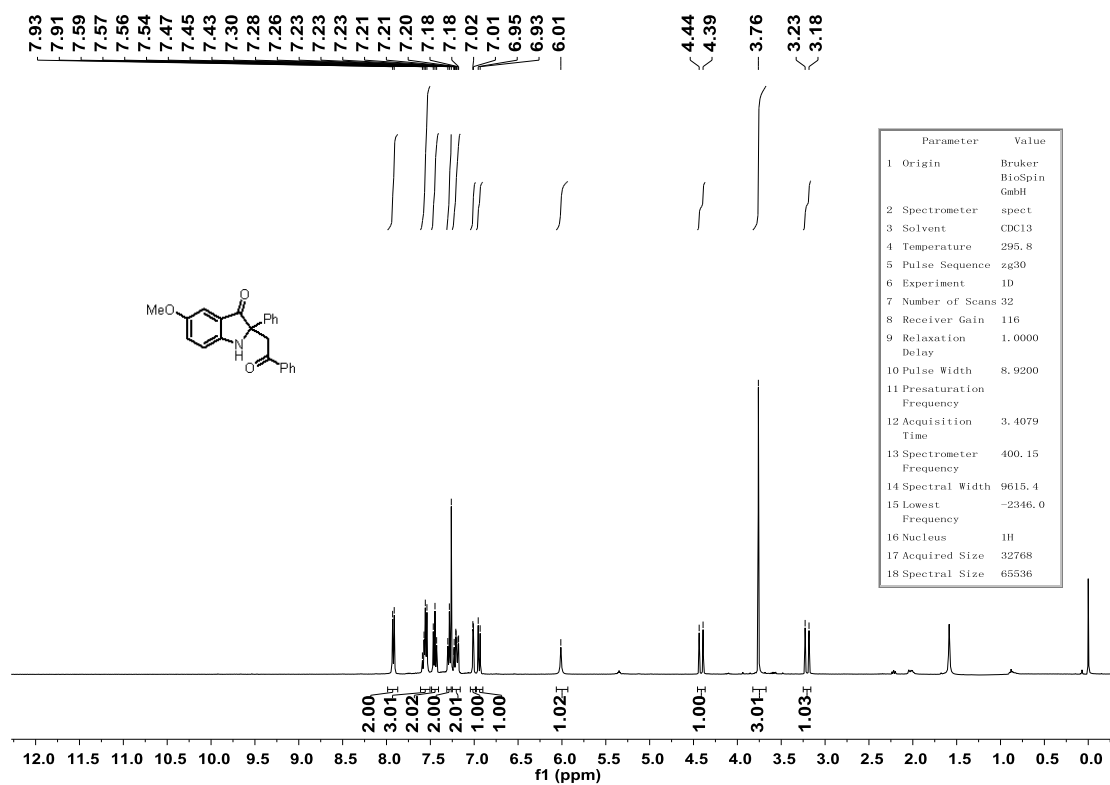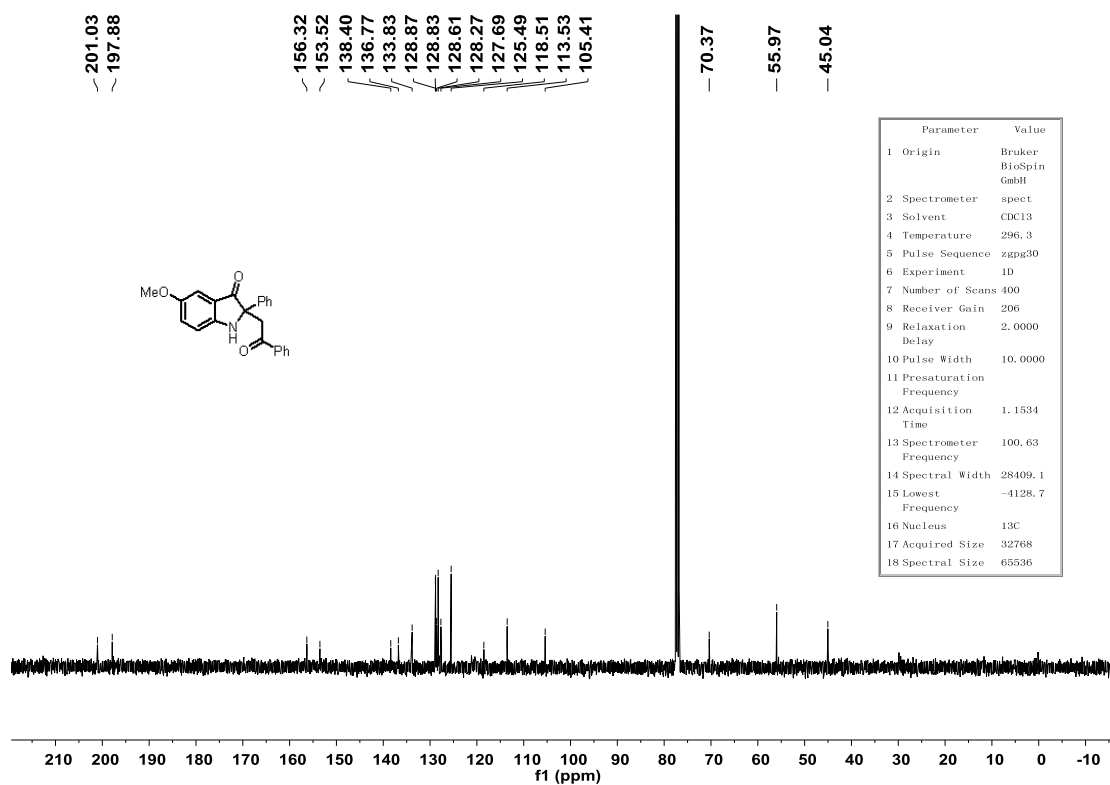

3n

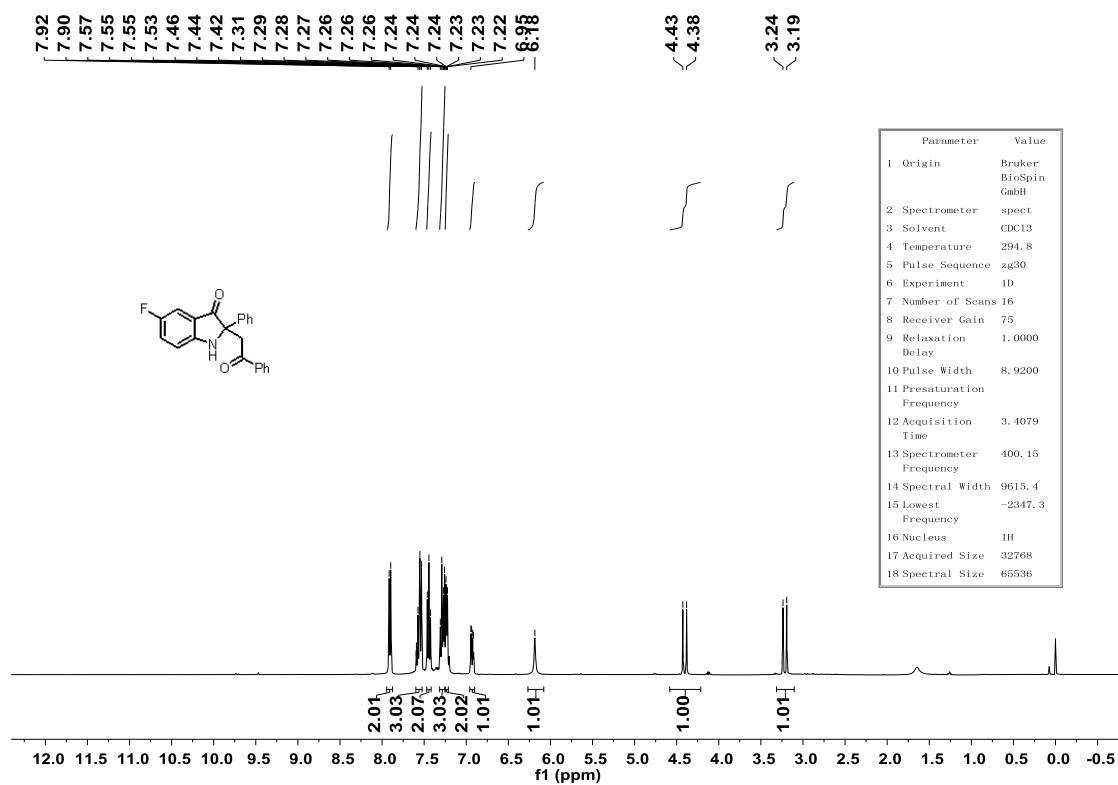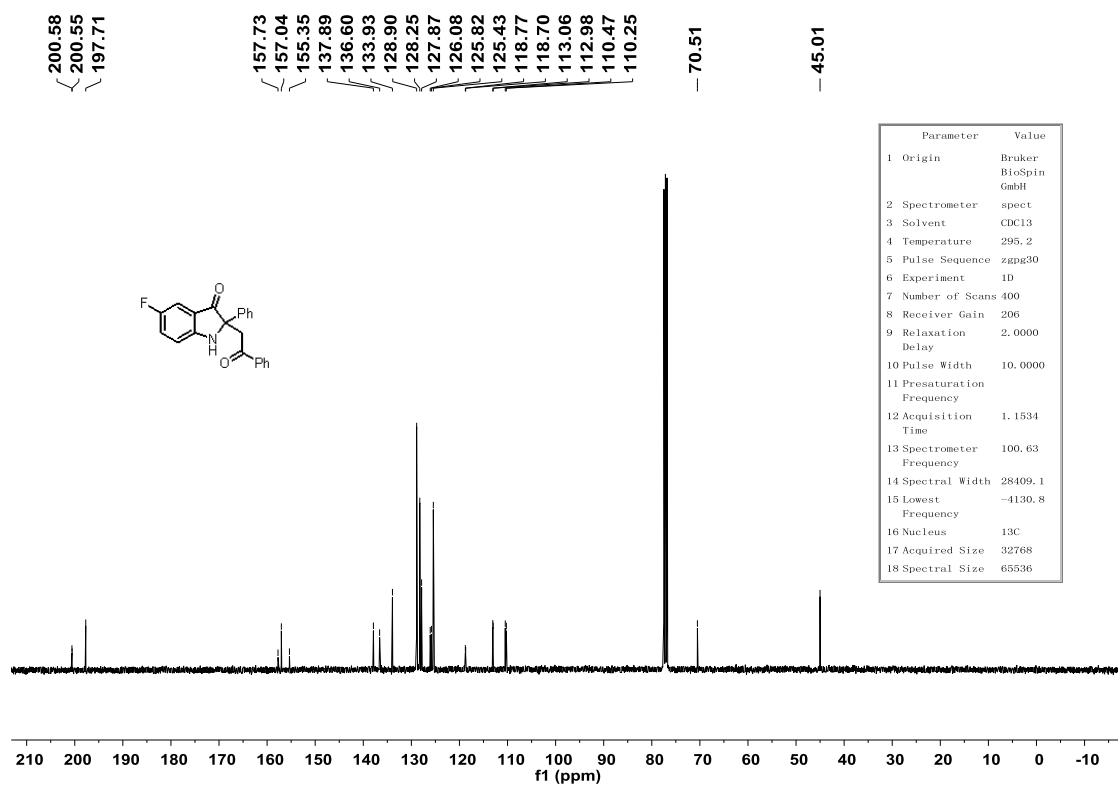

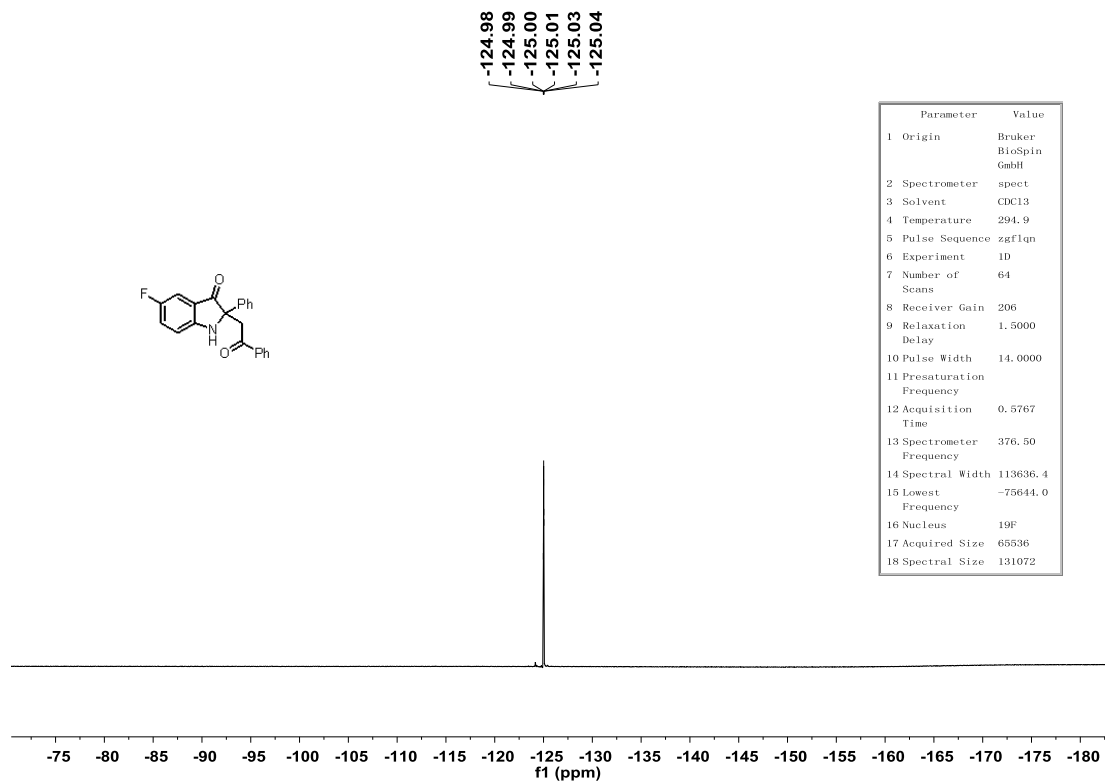

30

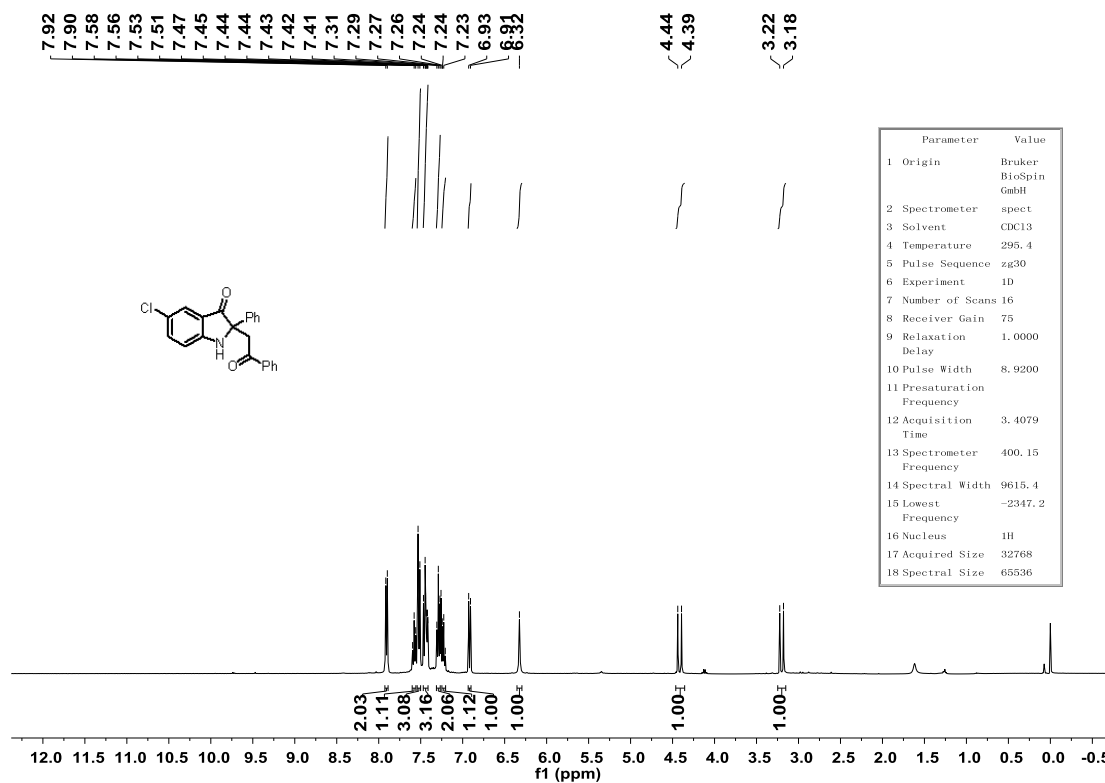

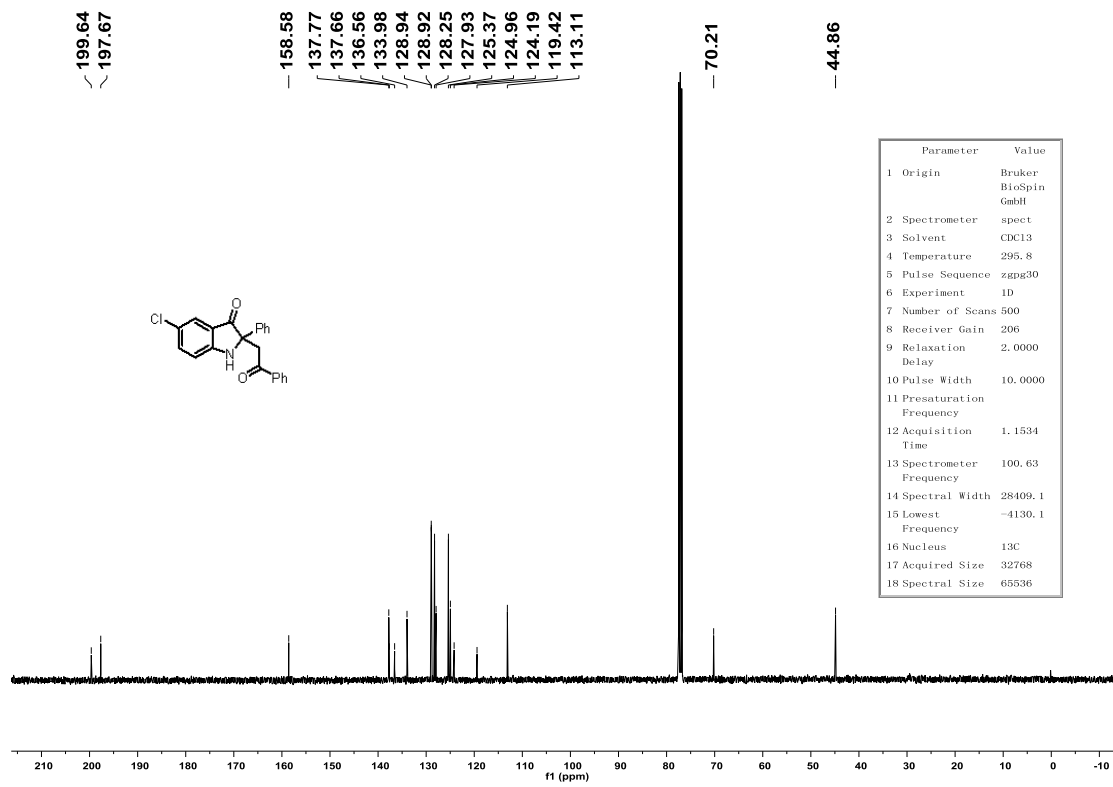

3p

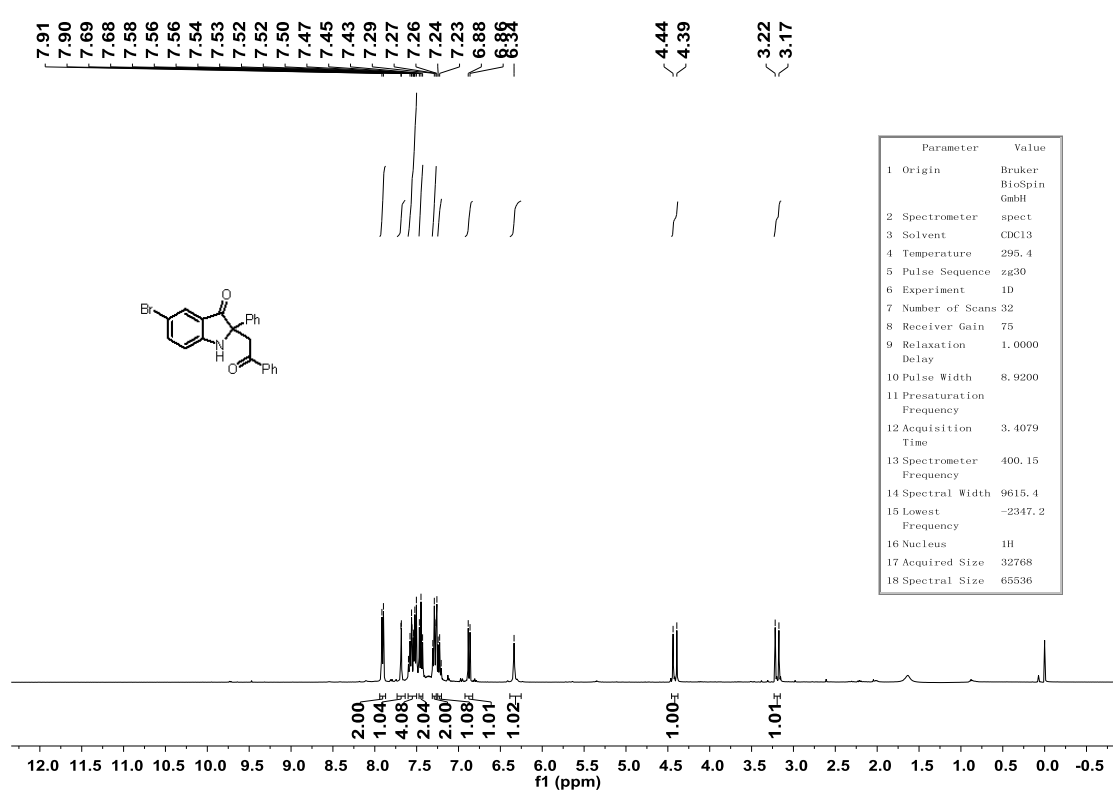

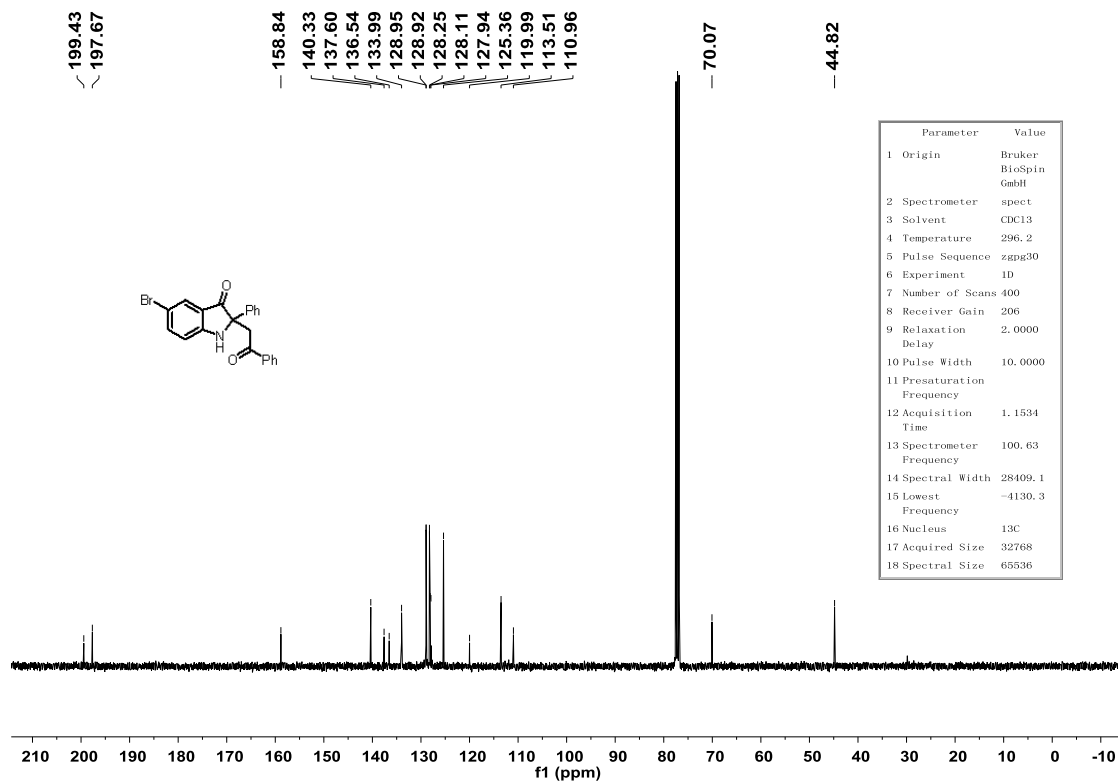

3q

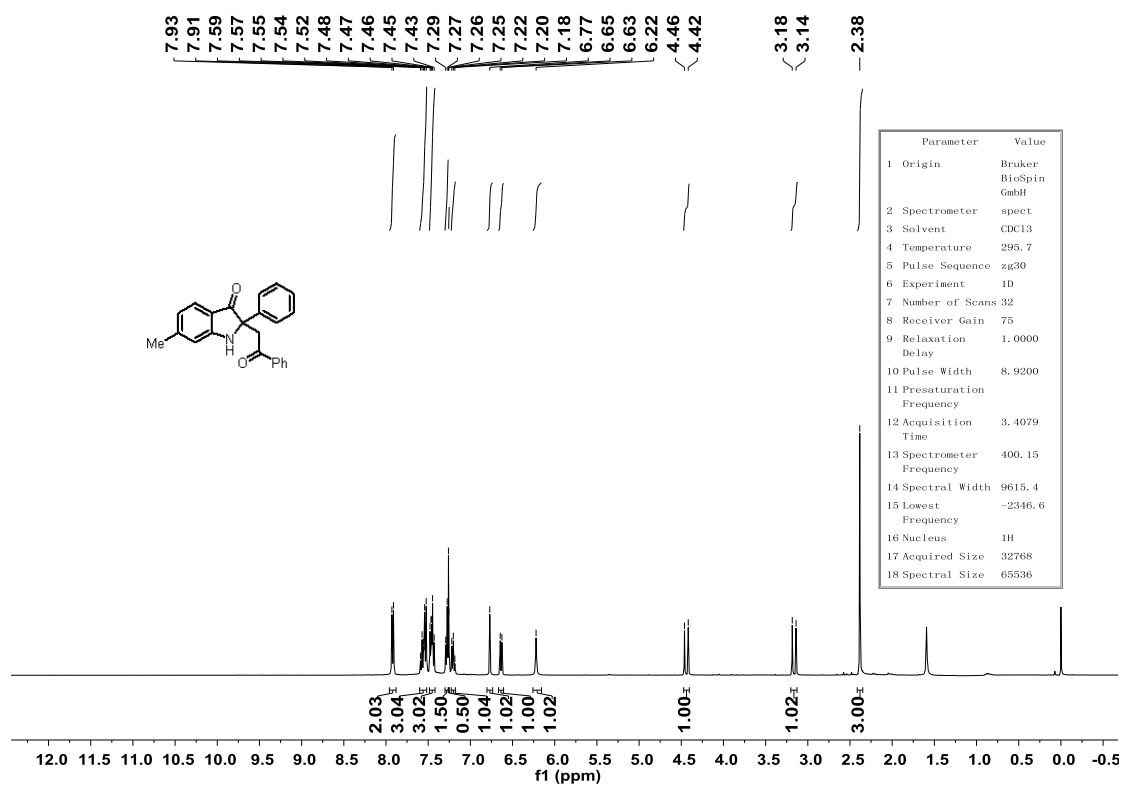

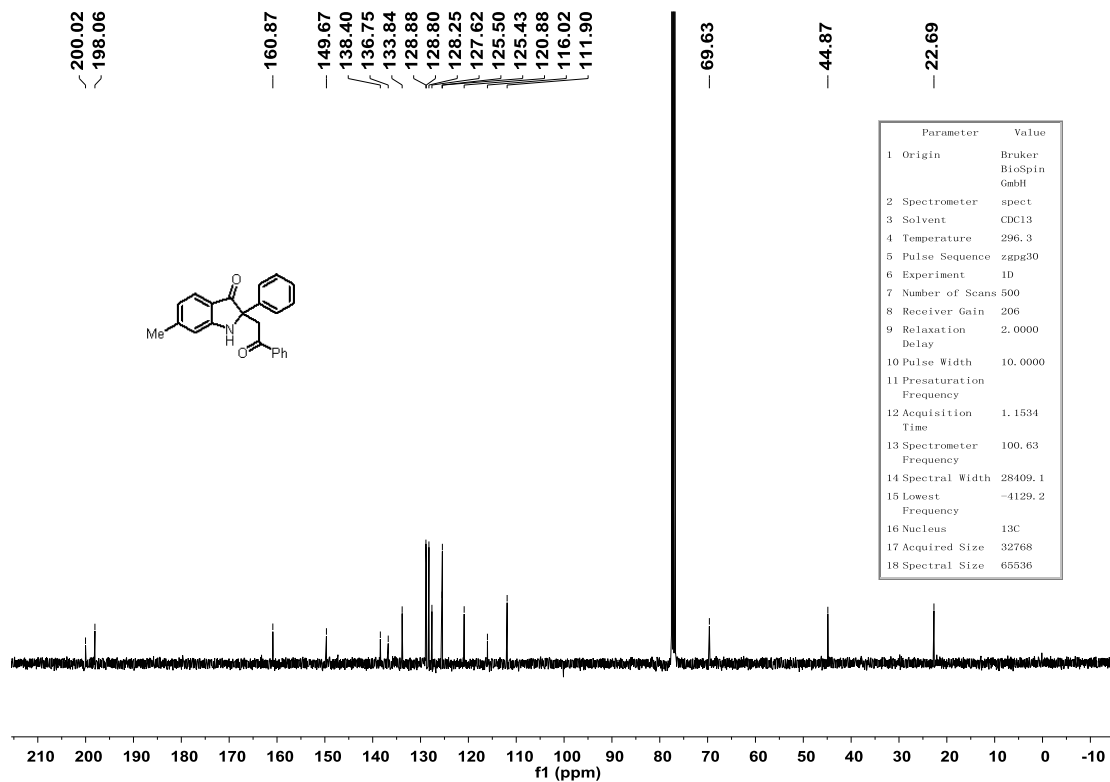

3r

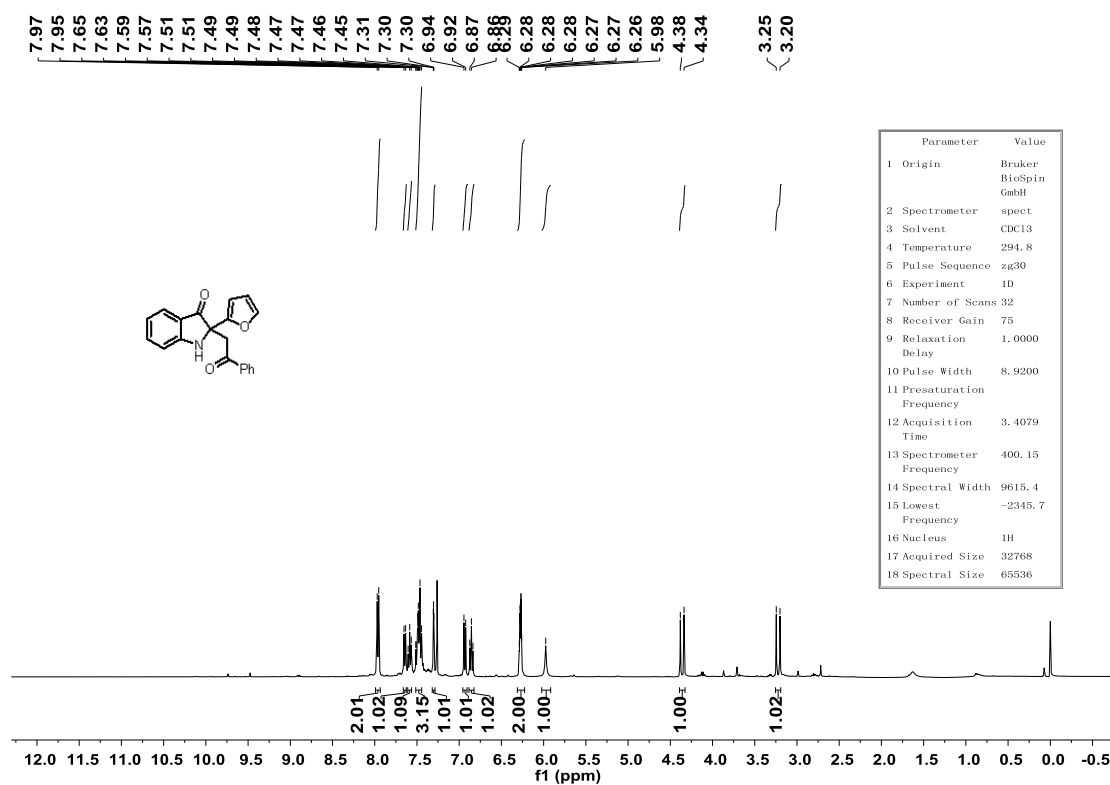

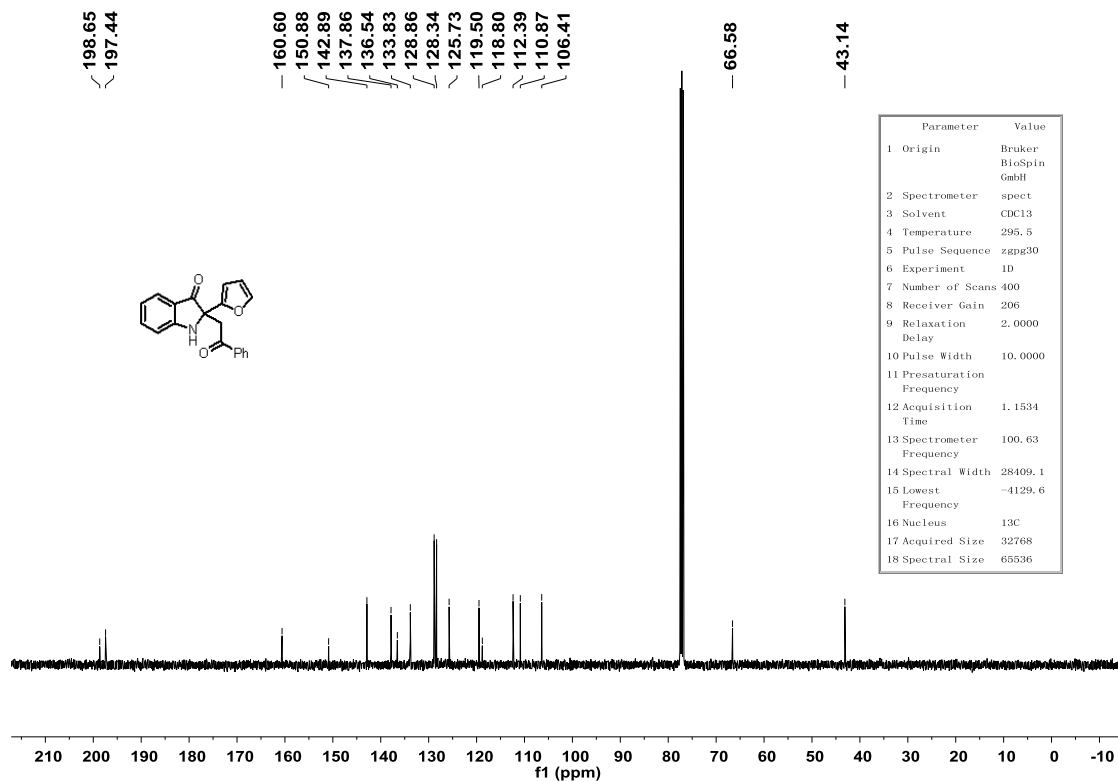

3s

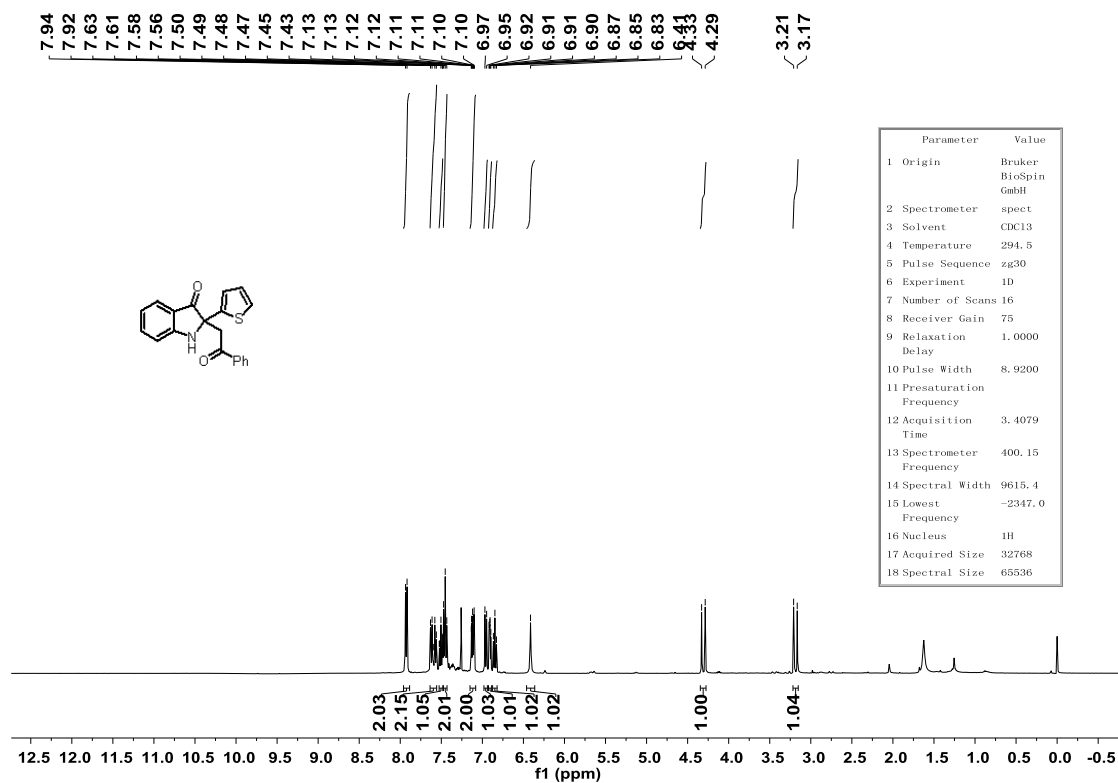

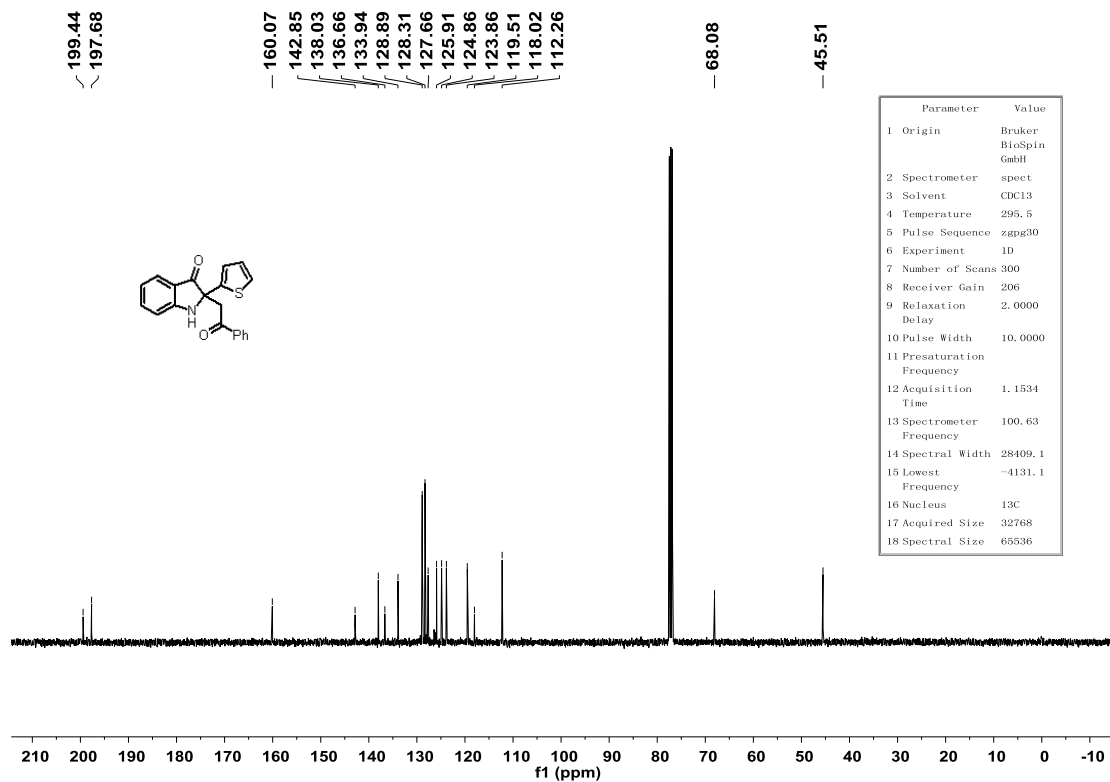

3t

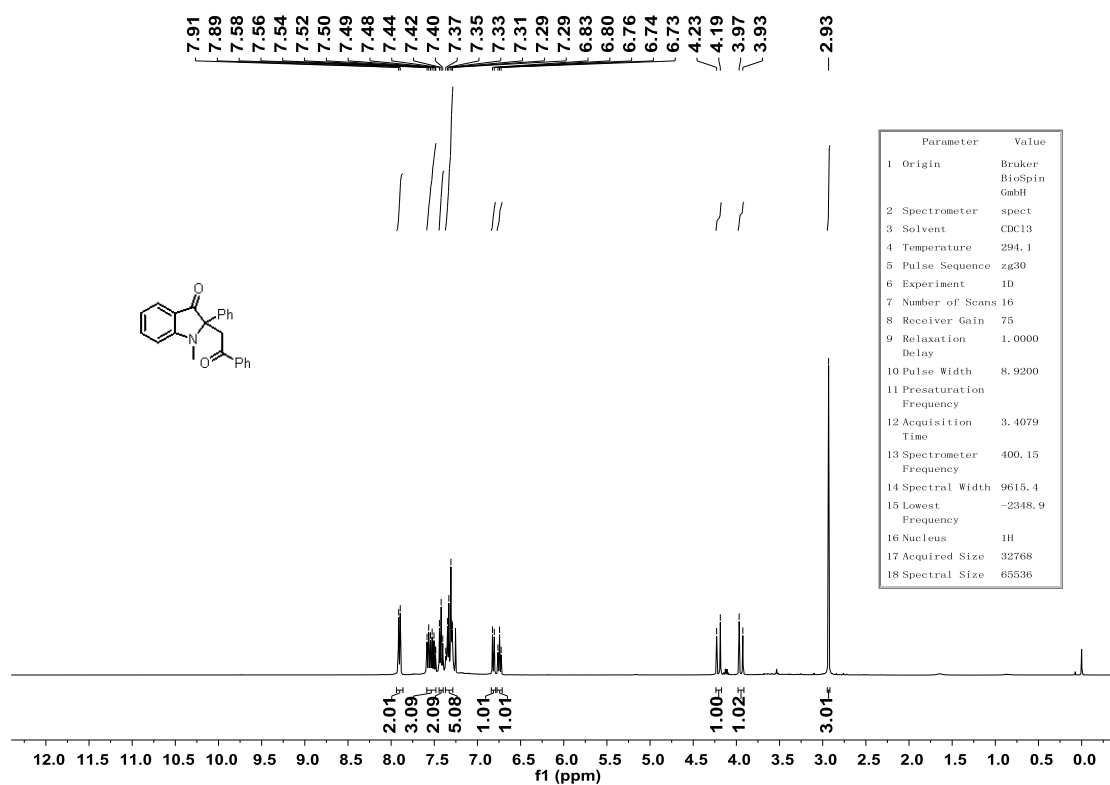



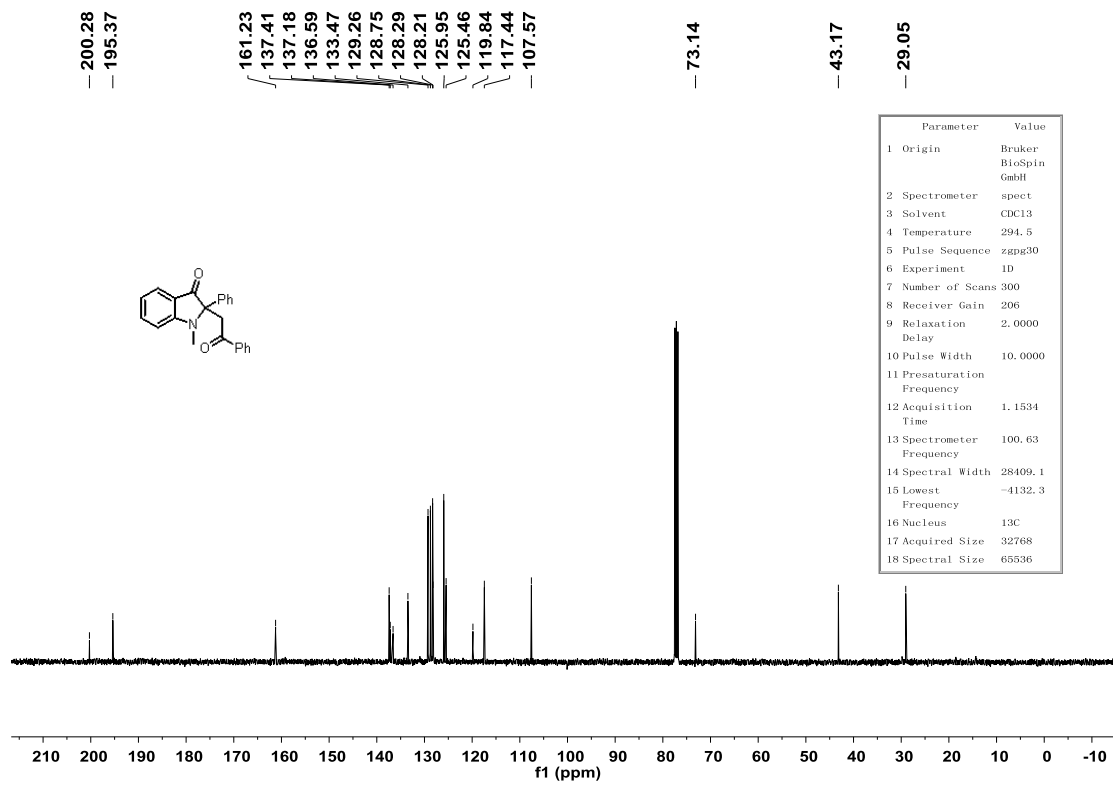

3u

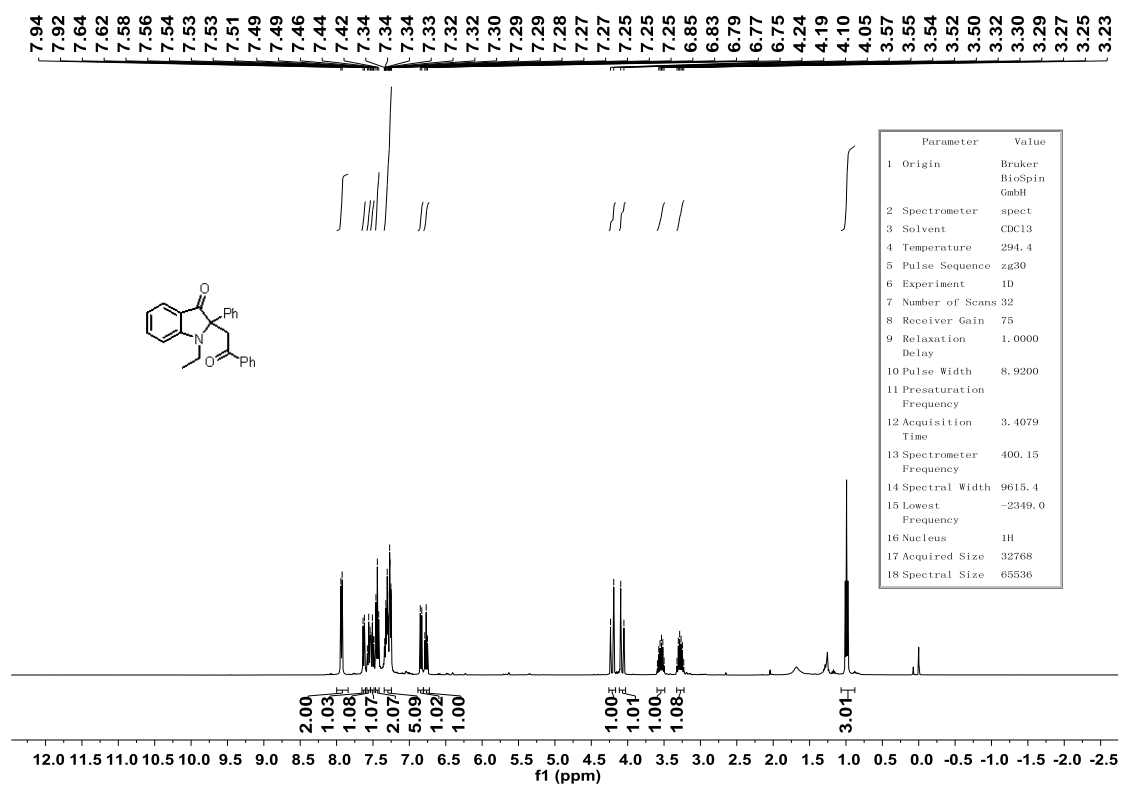

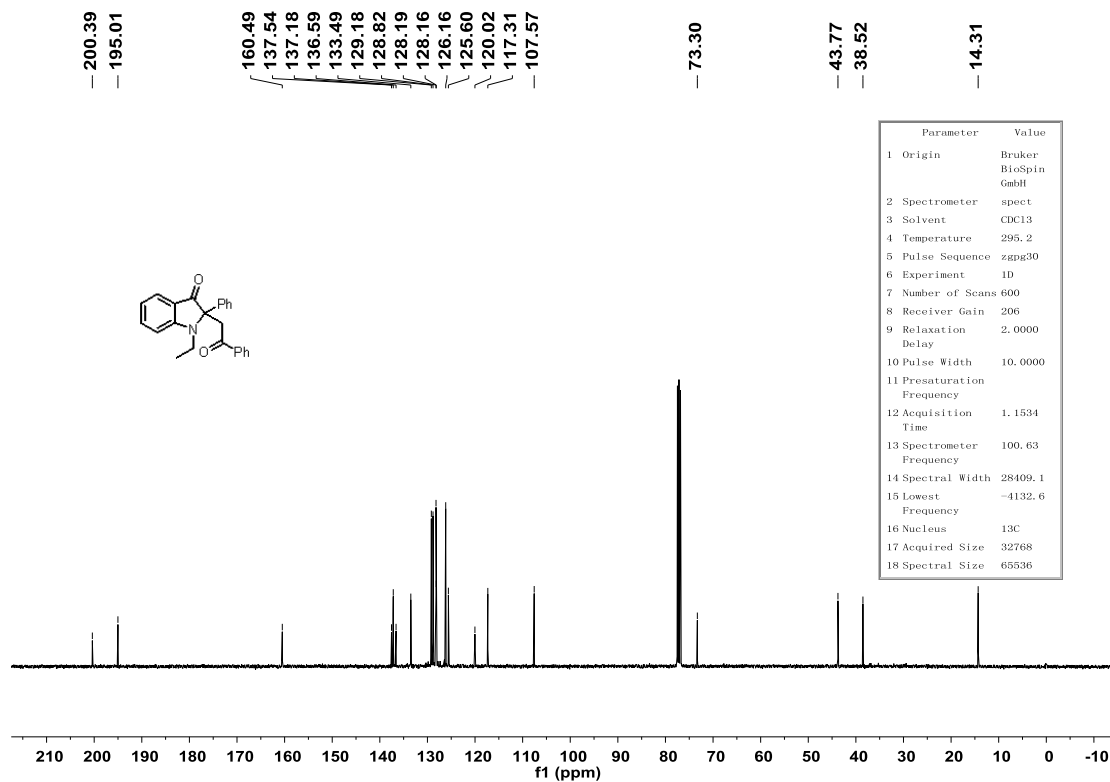

3v

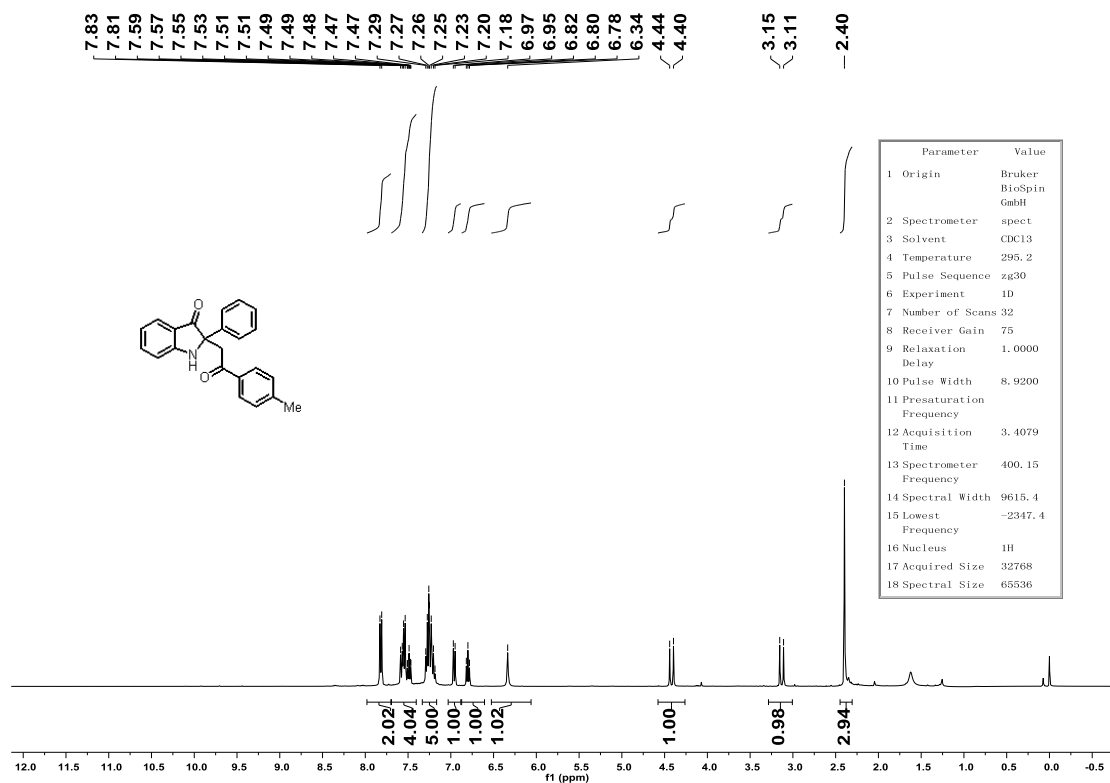

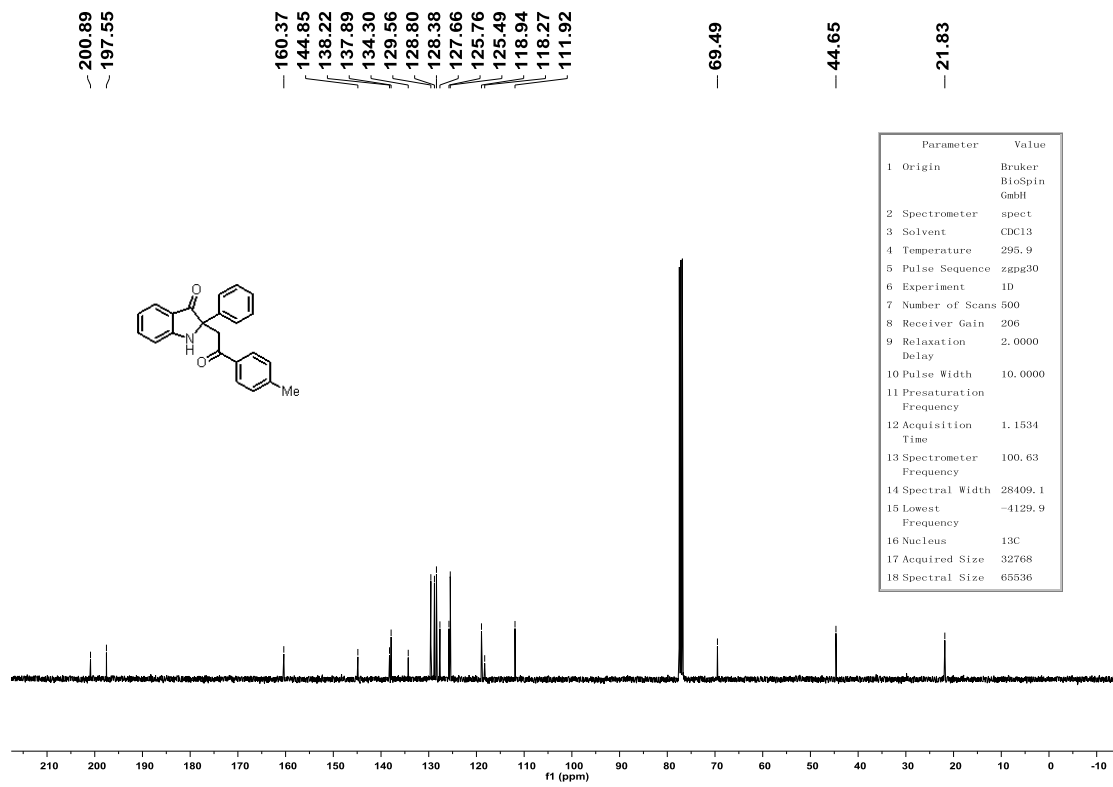

3w

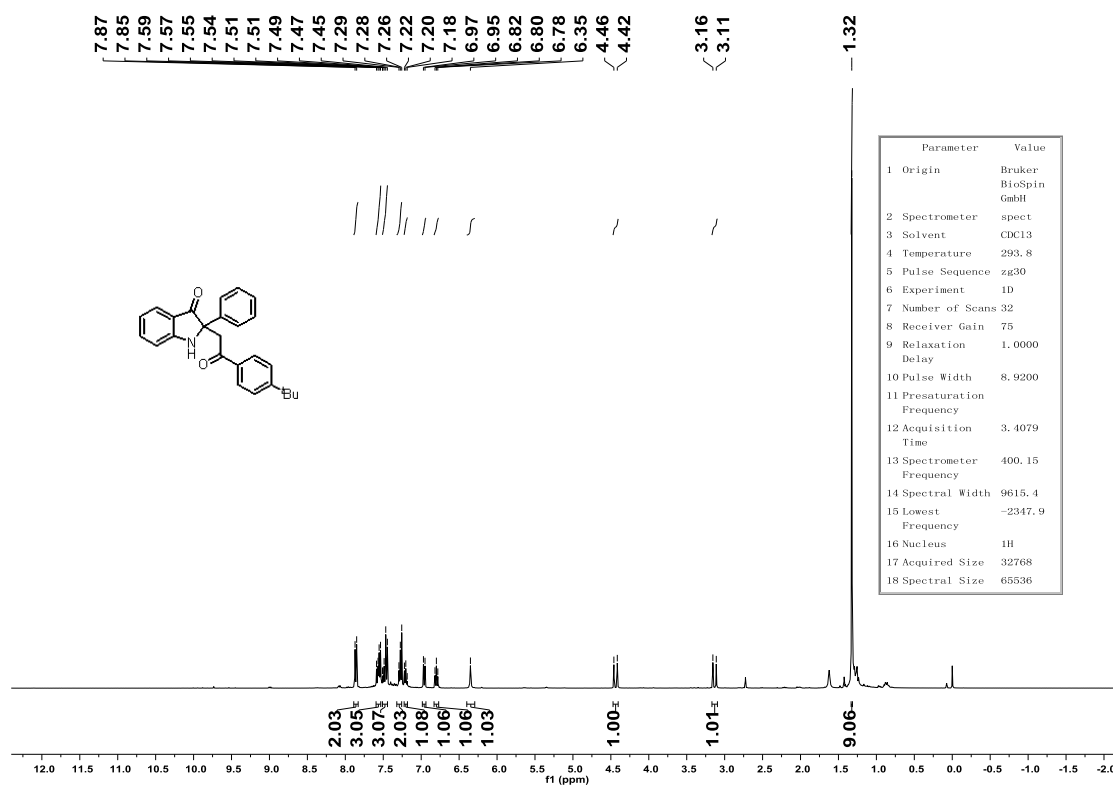

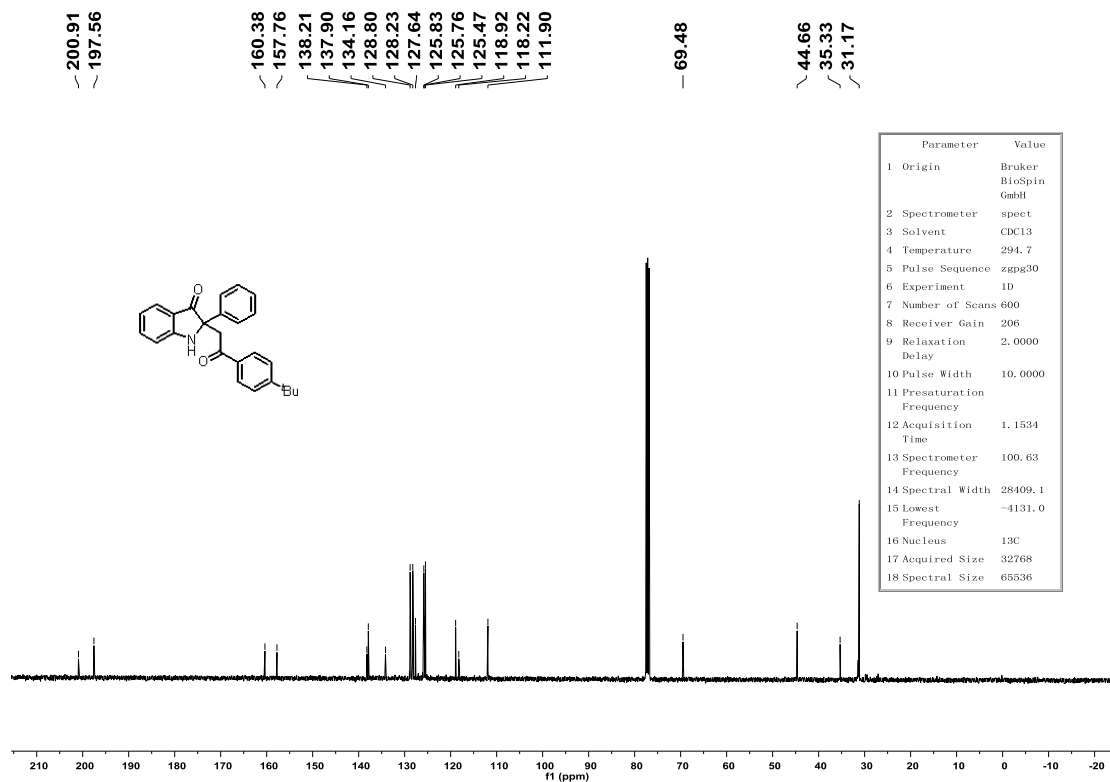

3x

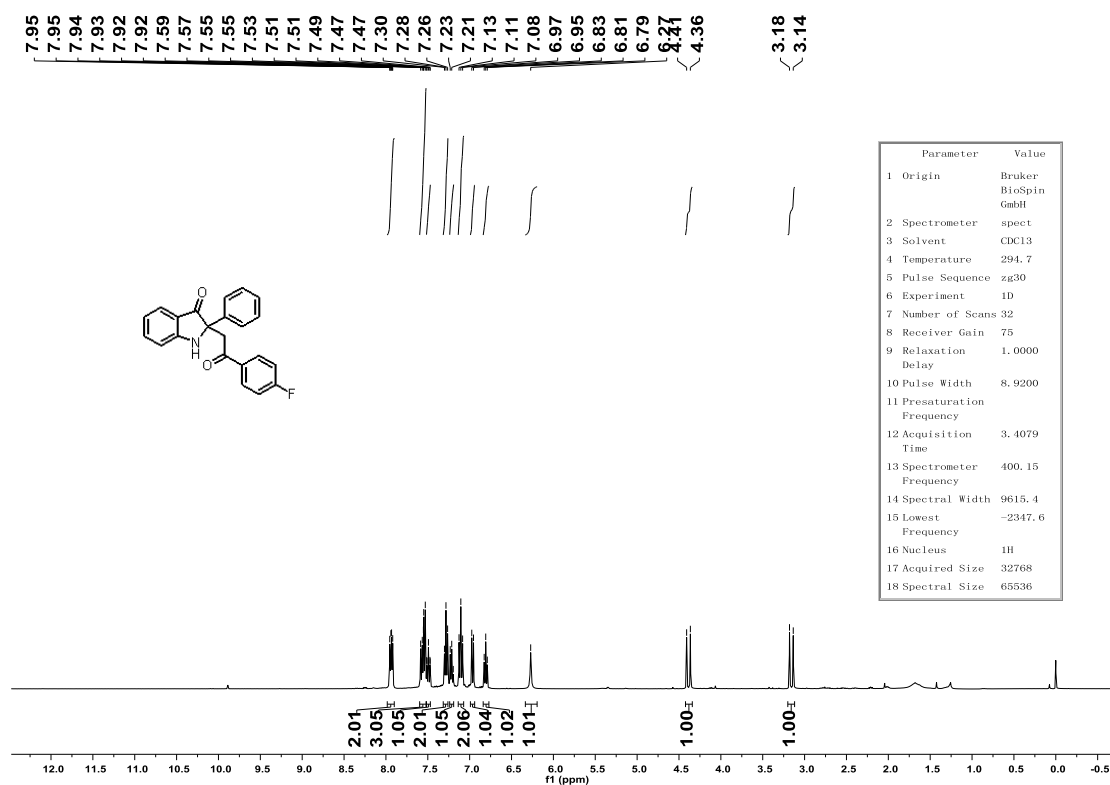

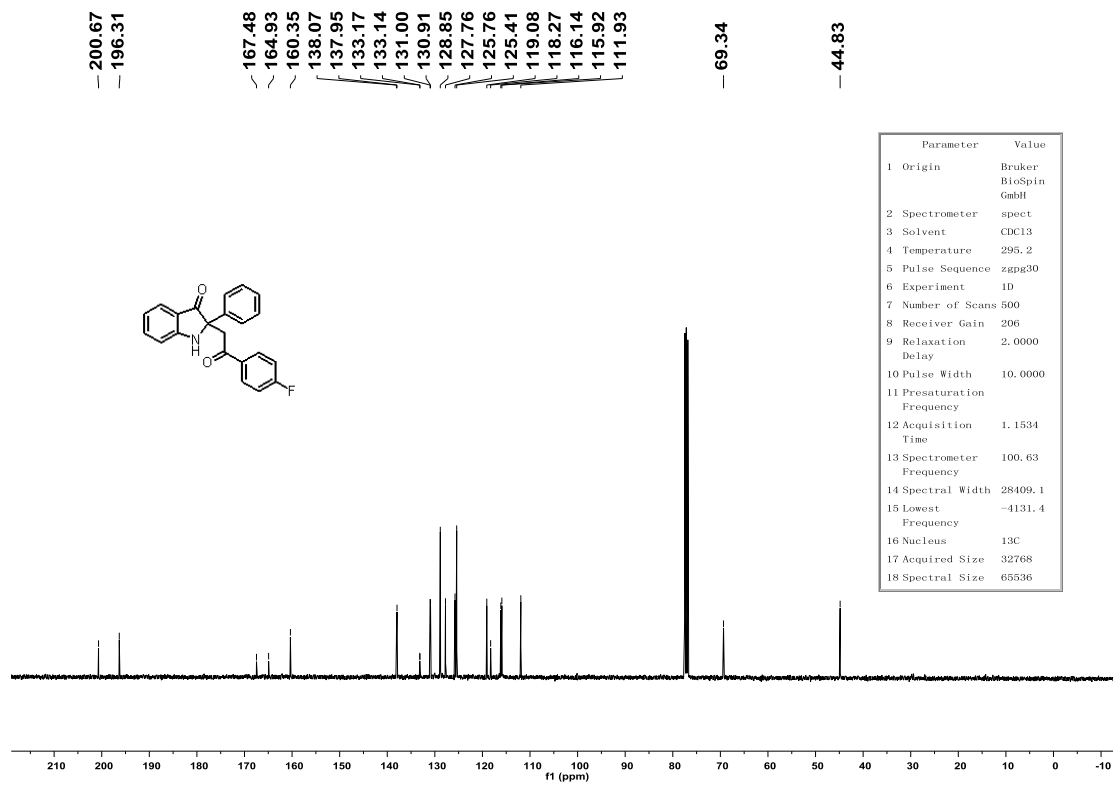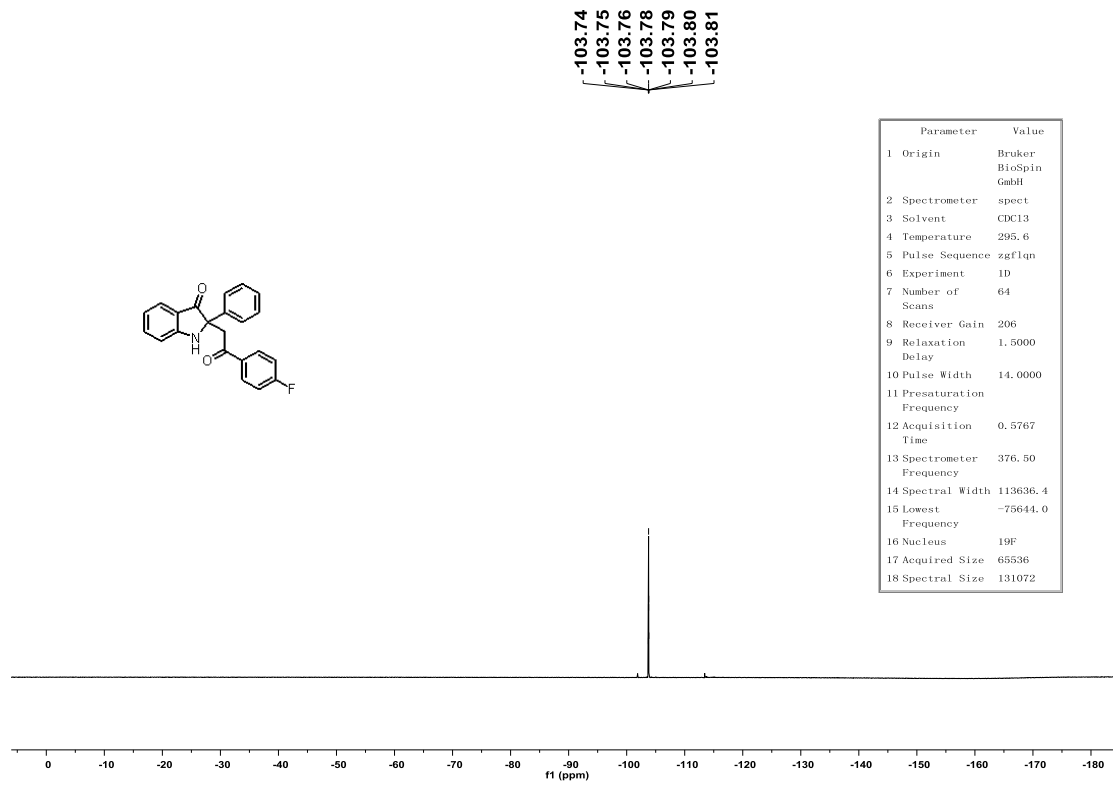

3y

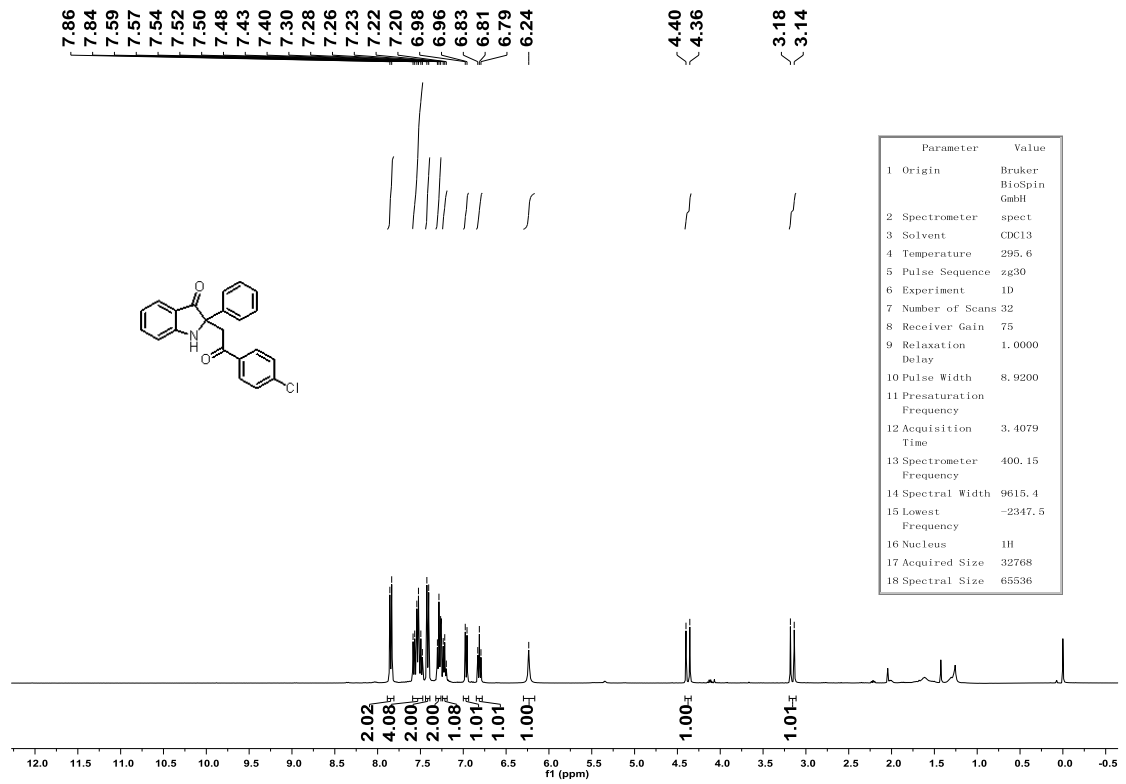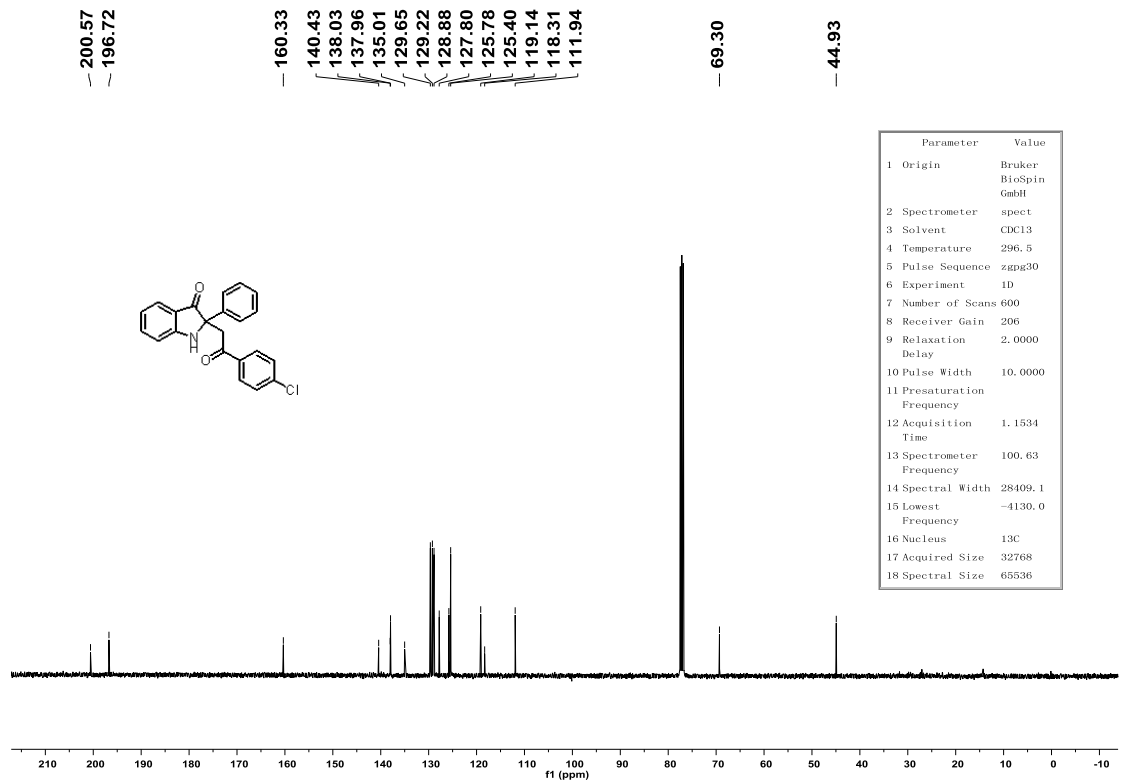

3z

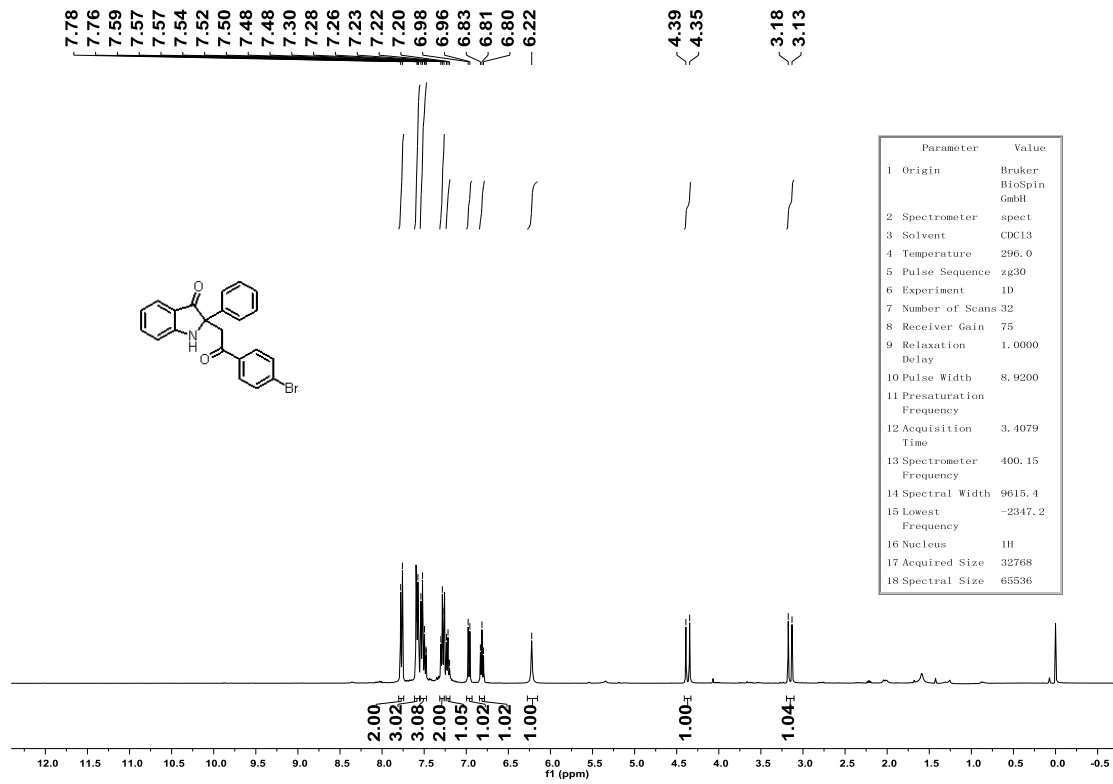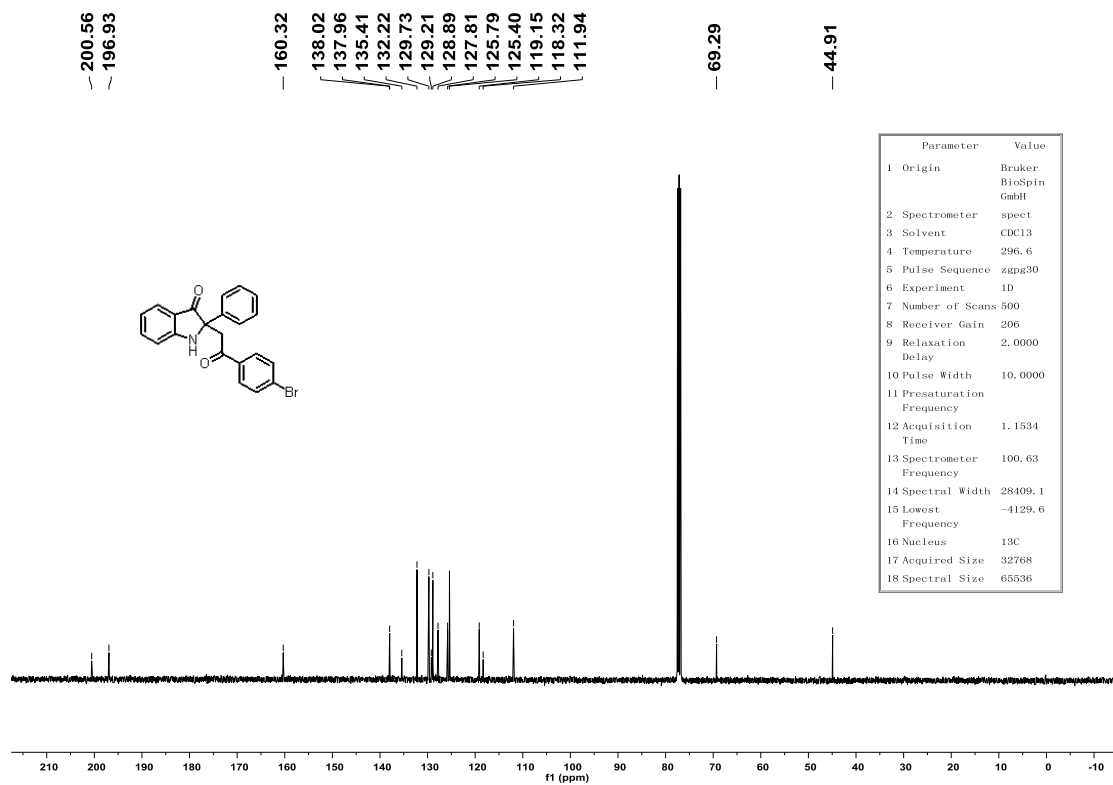

3aa

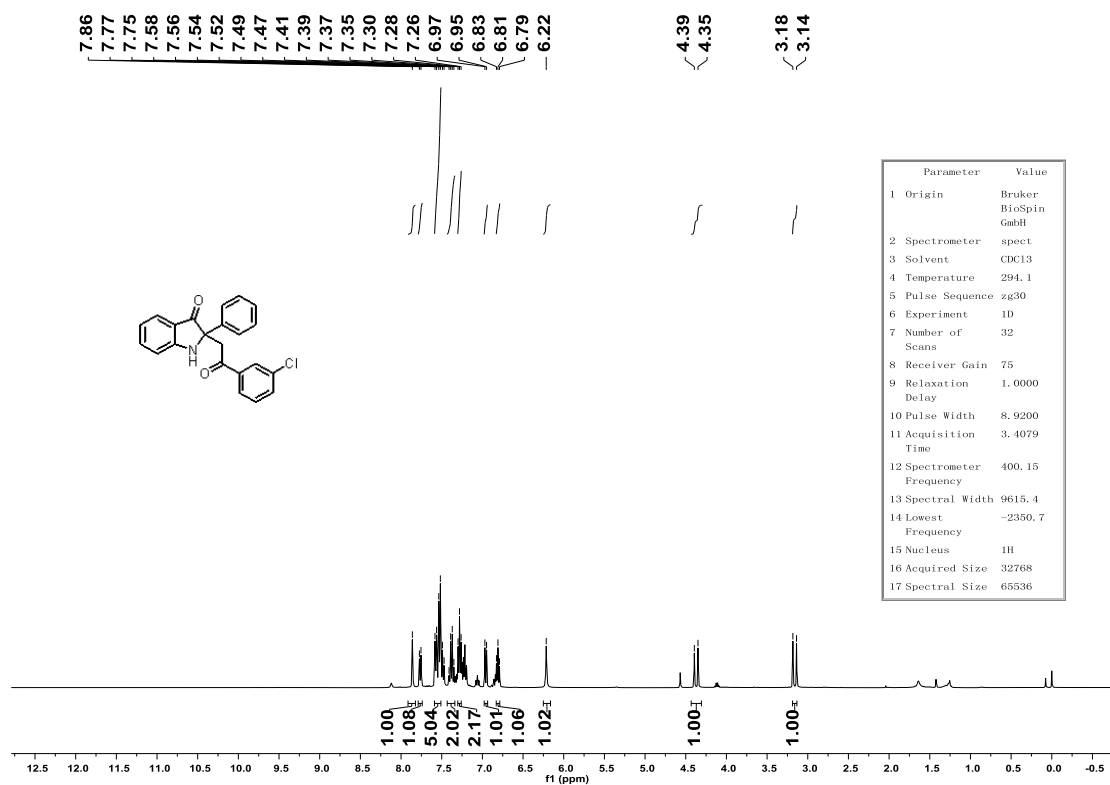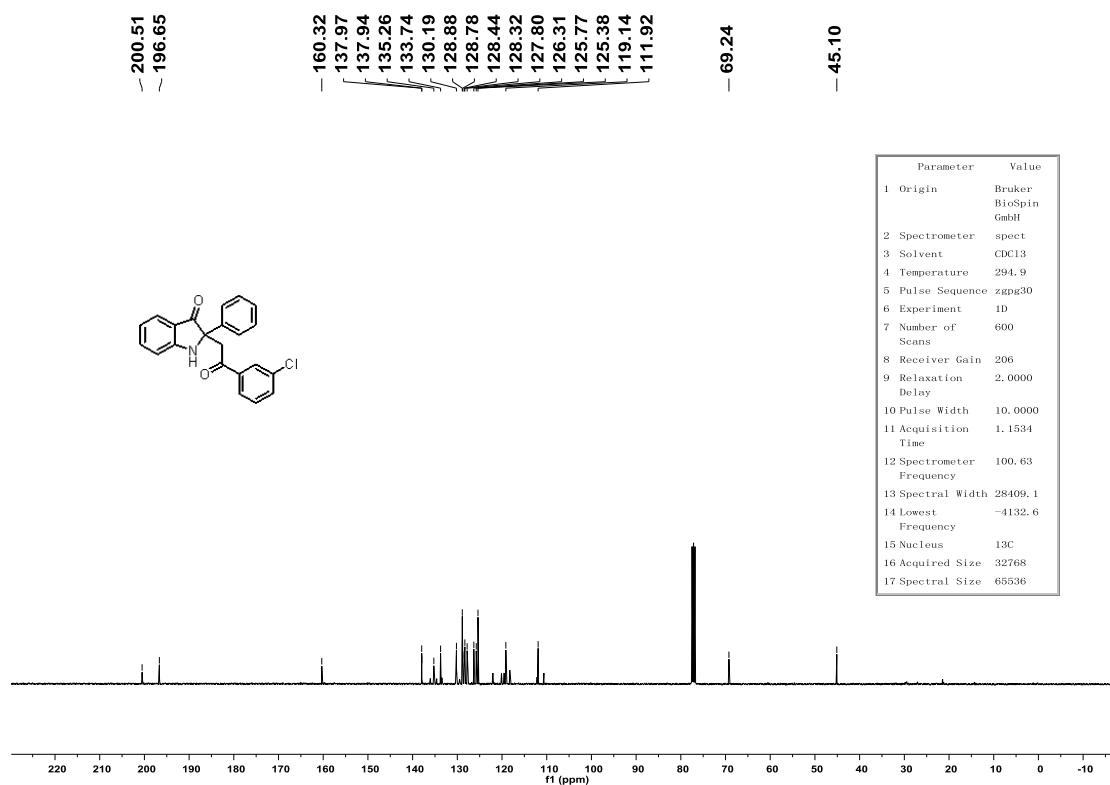



3ab

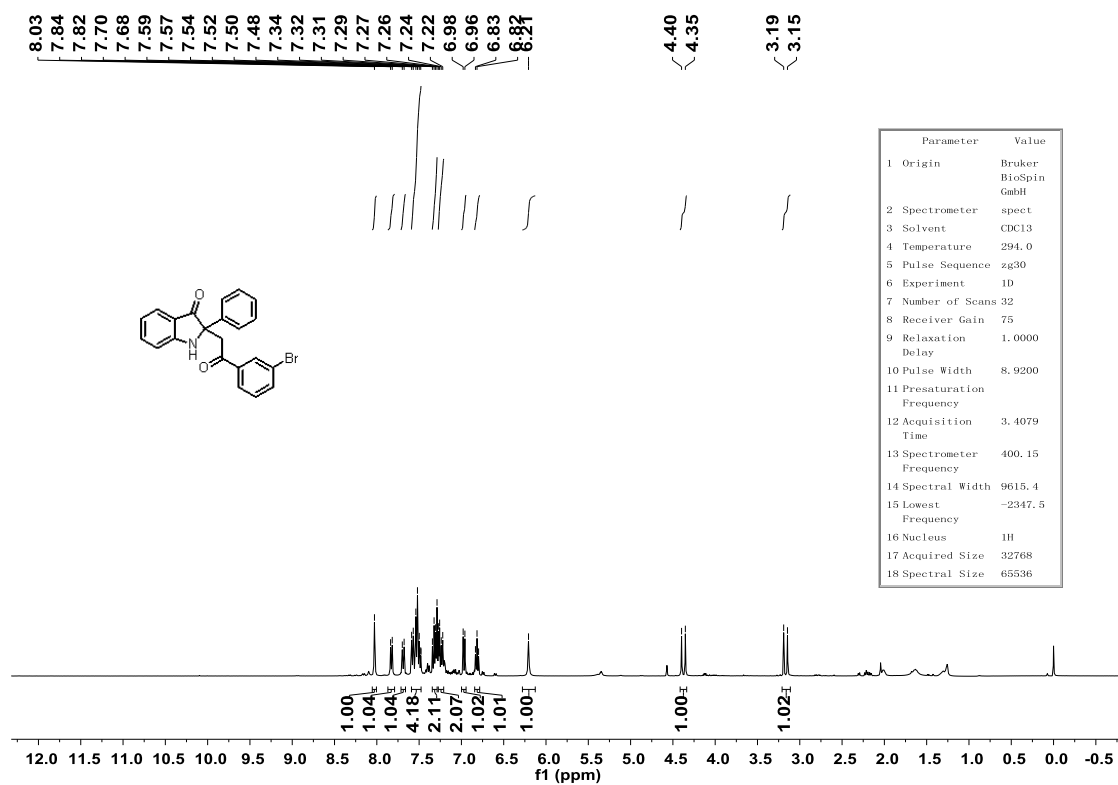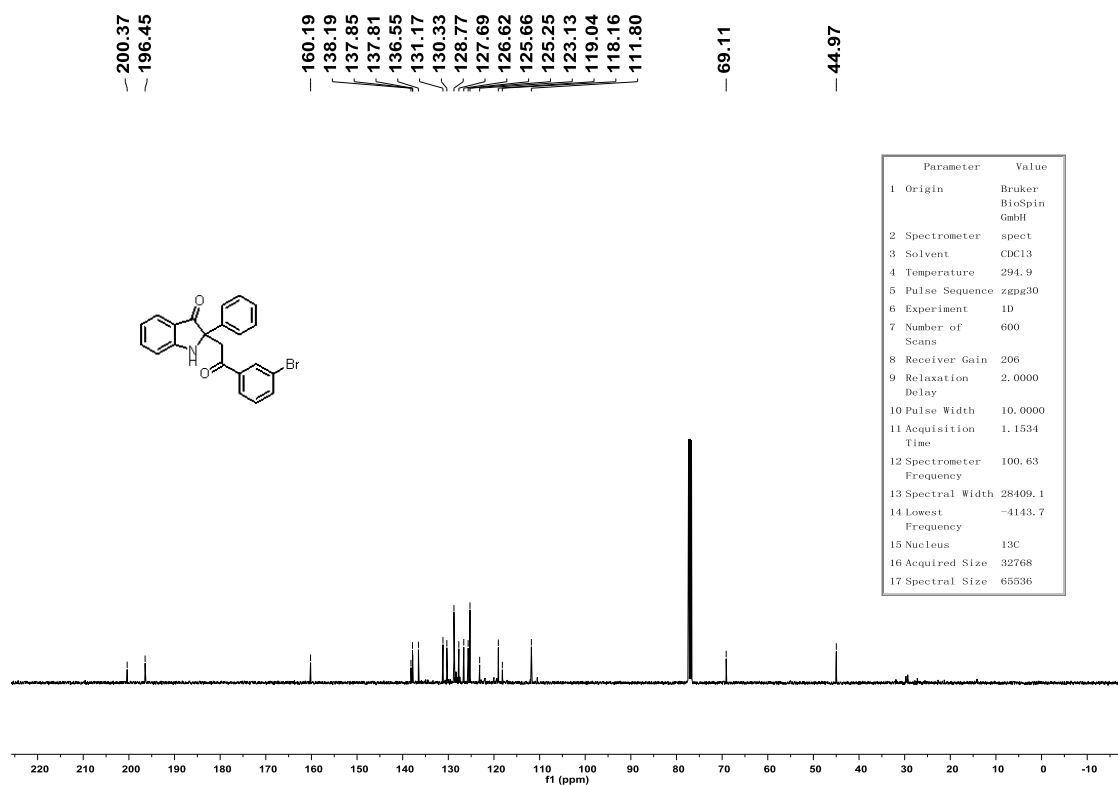

4a

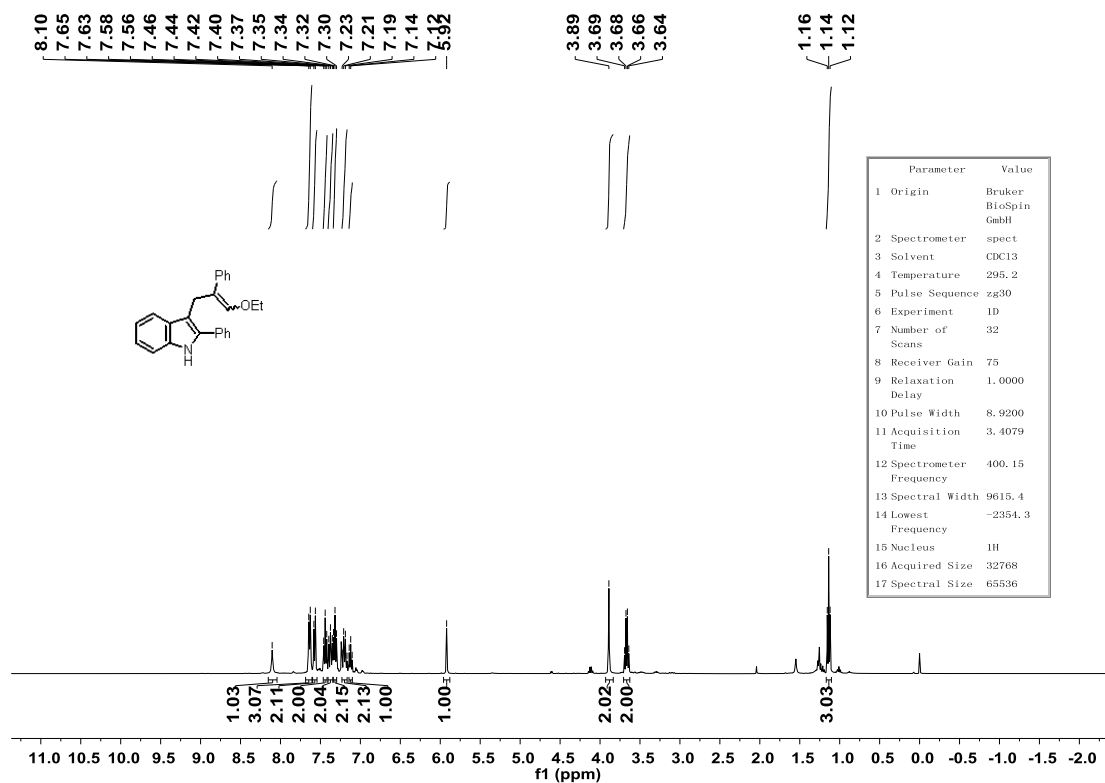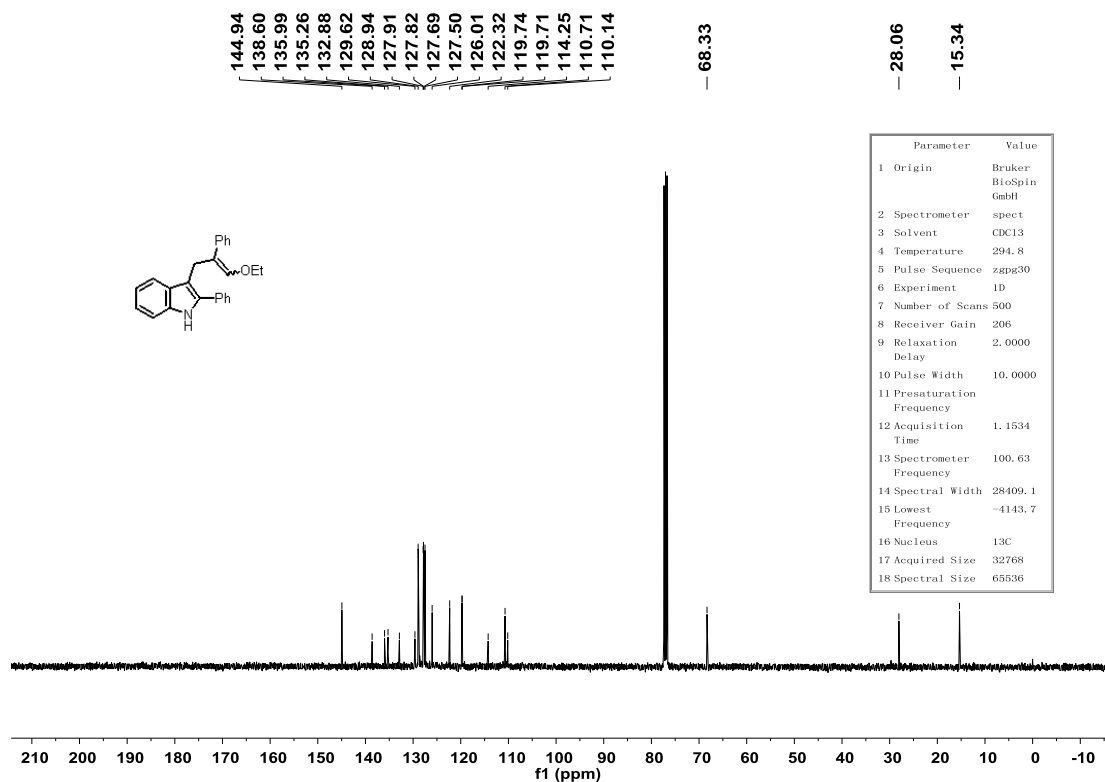

5a

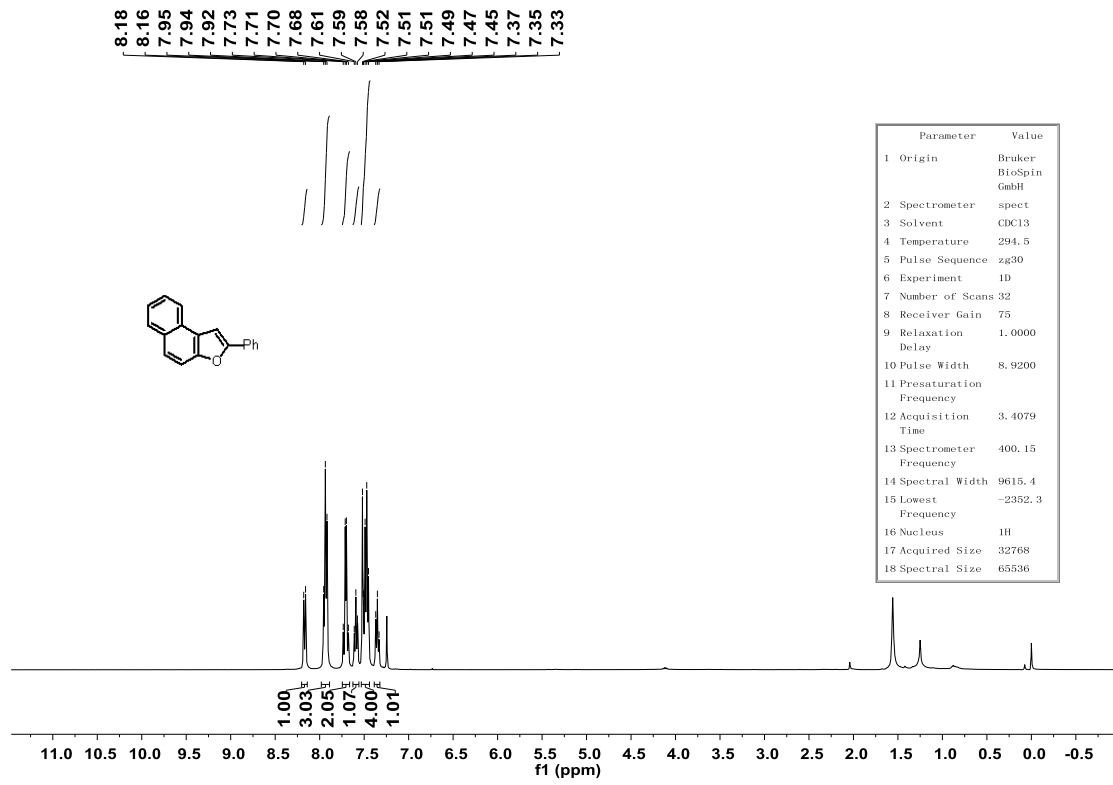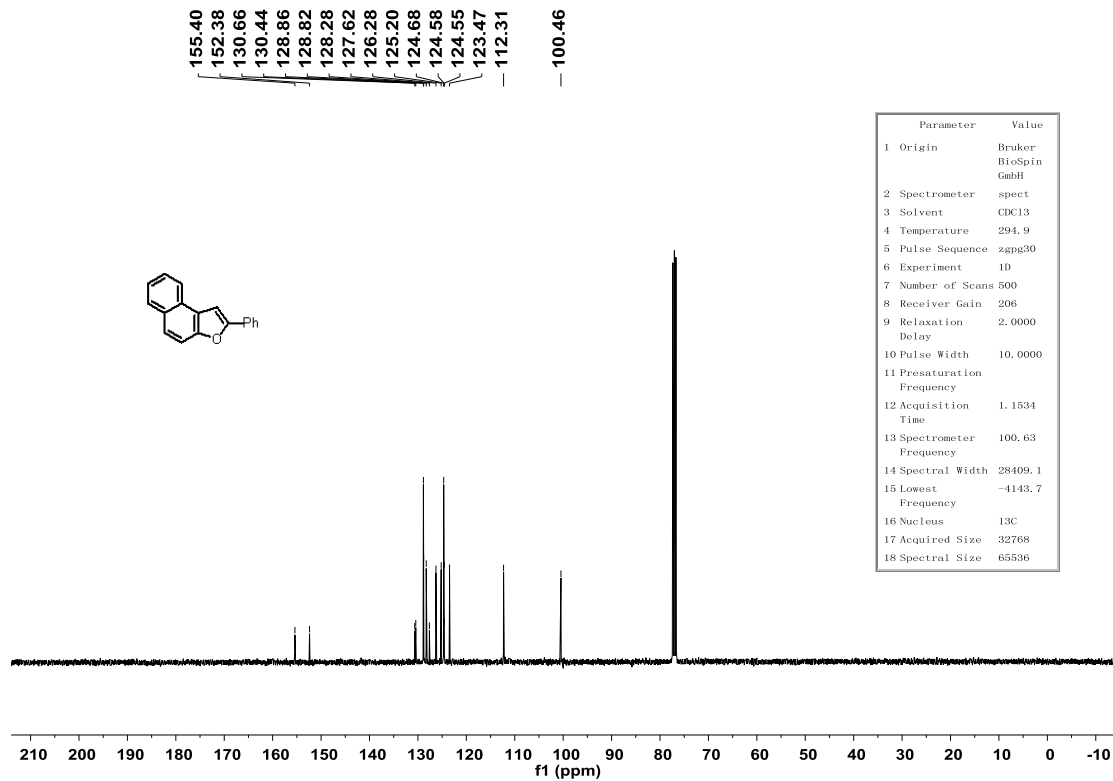

5b

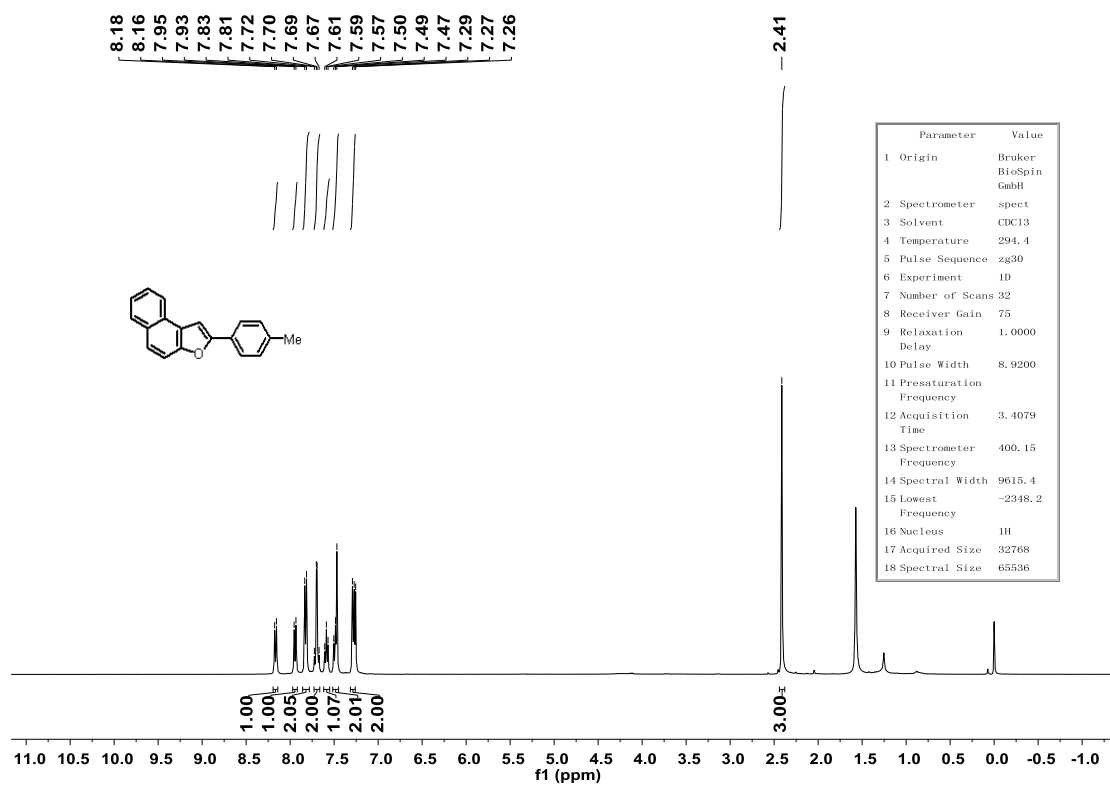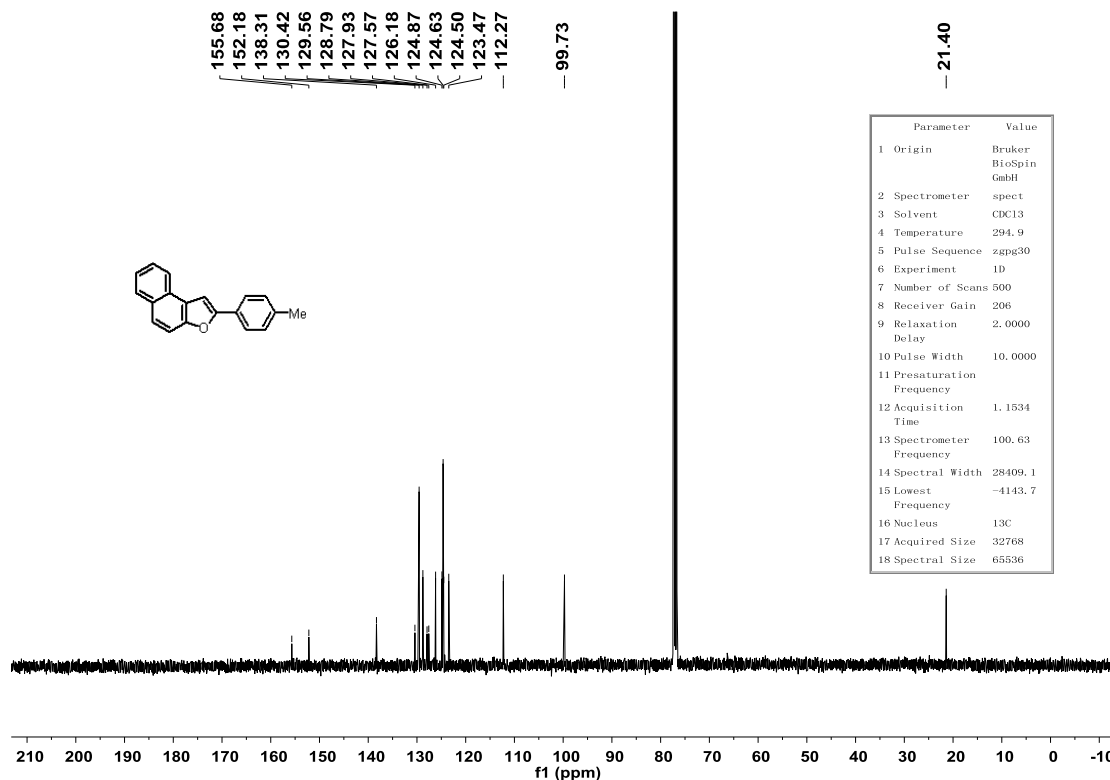

5c

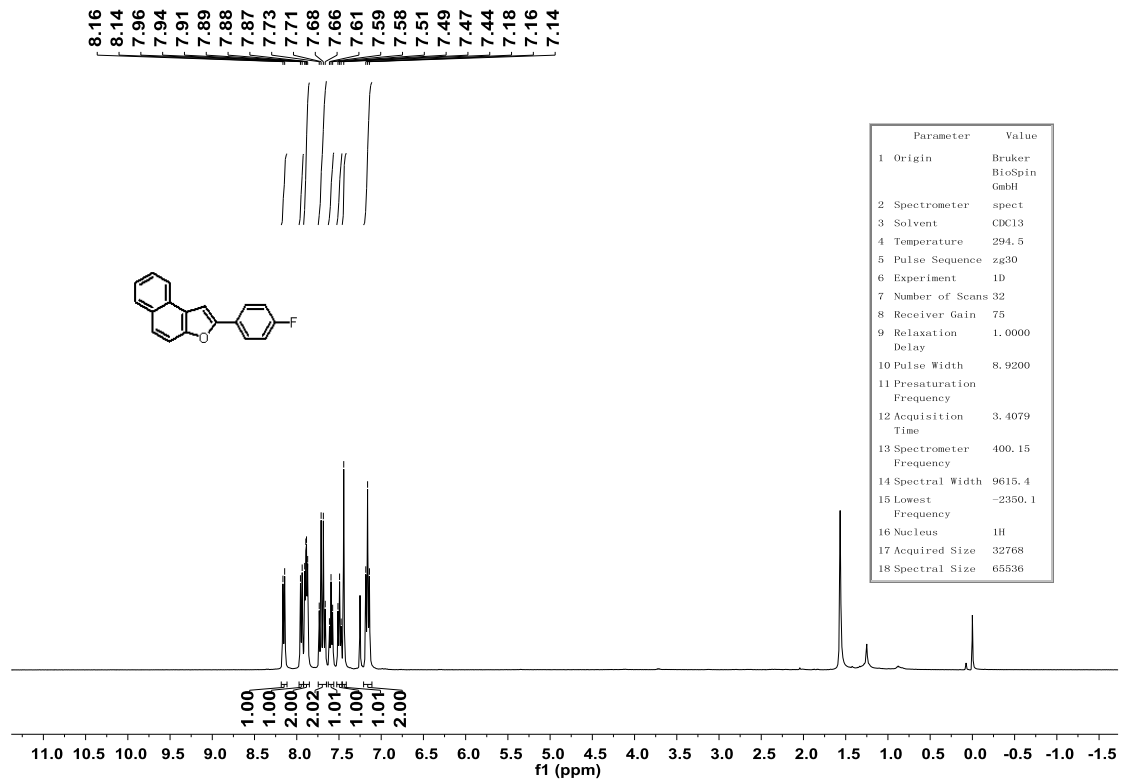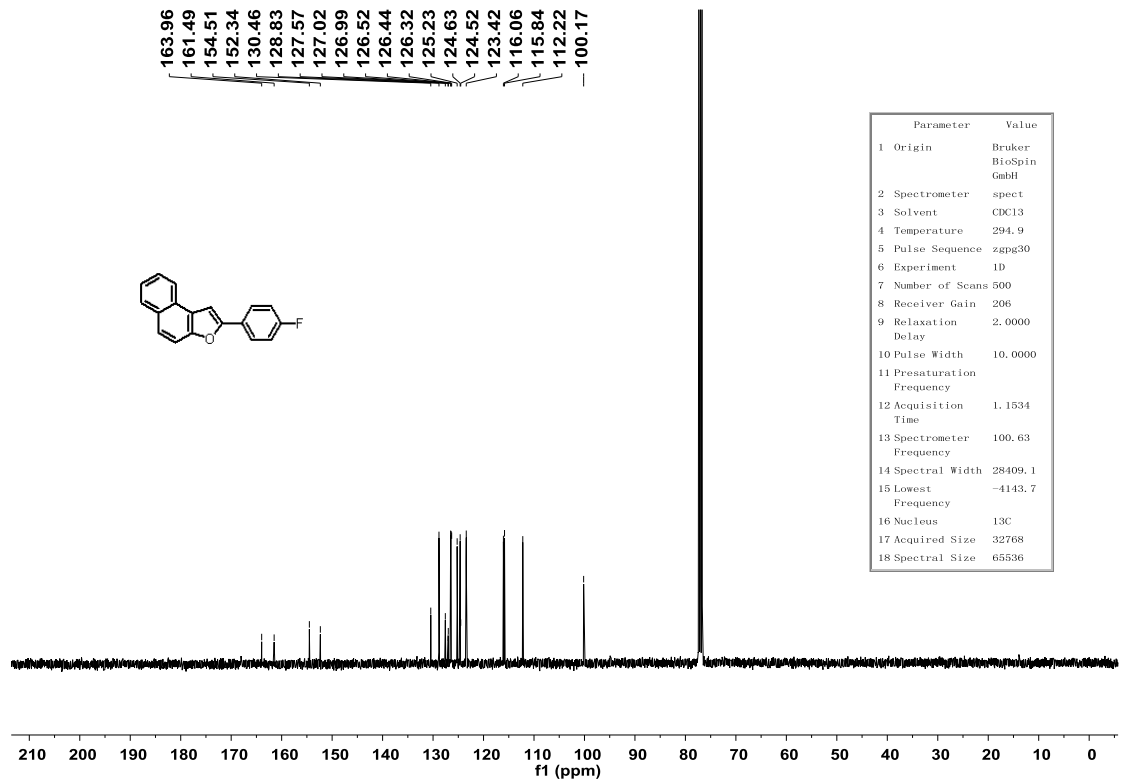

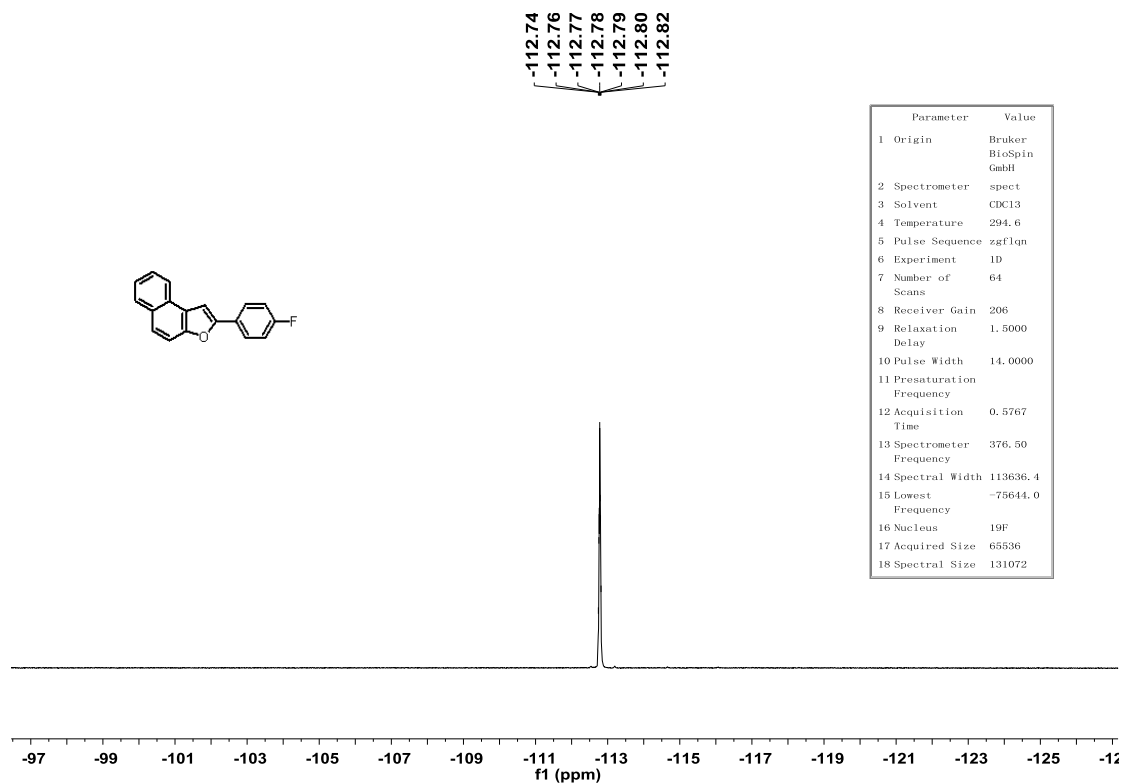

5d

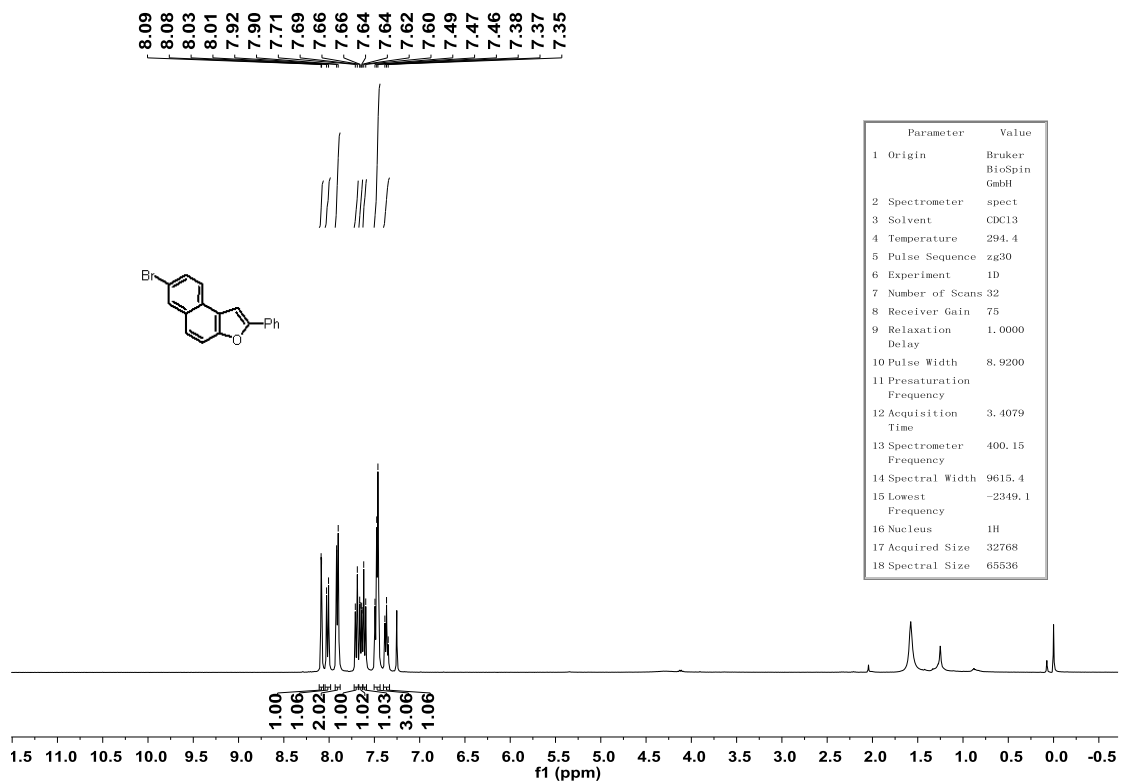

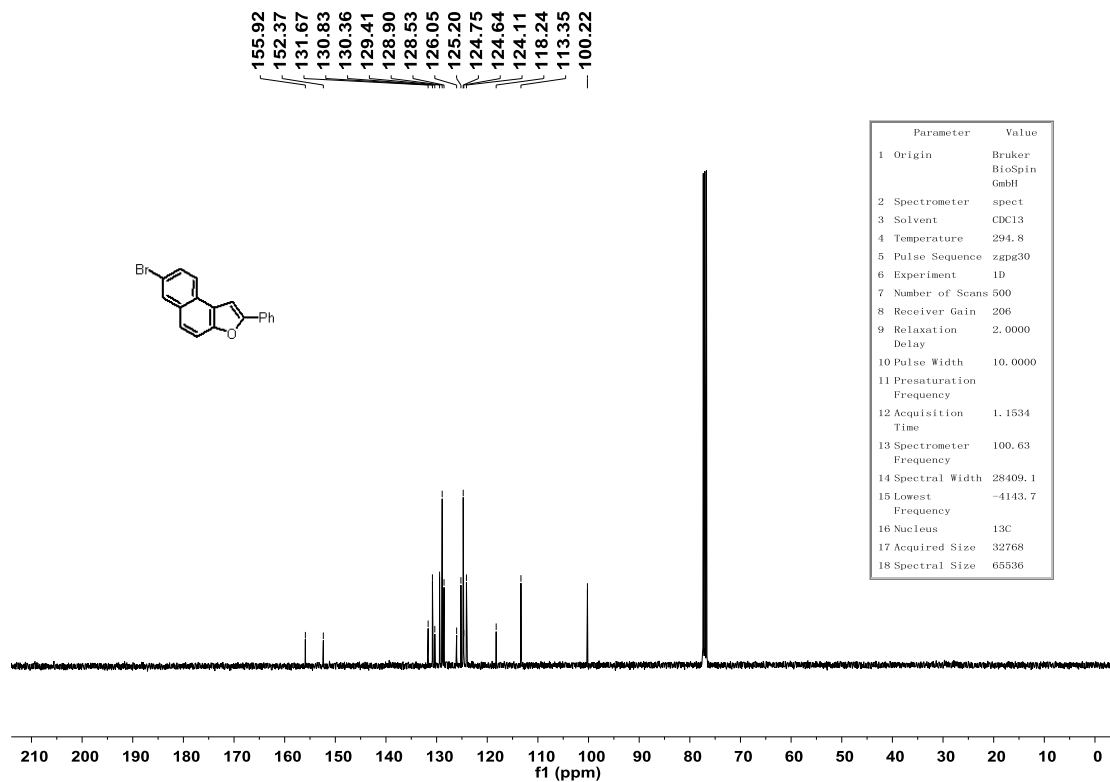

5e

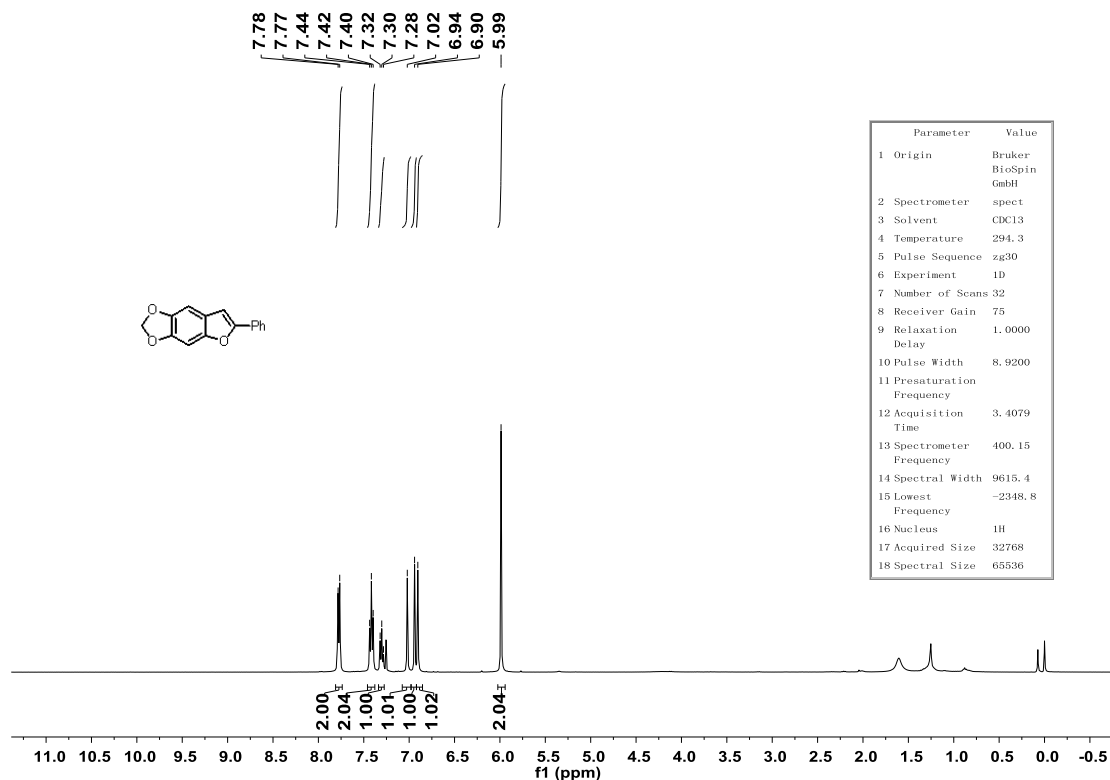

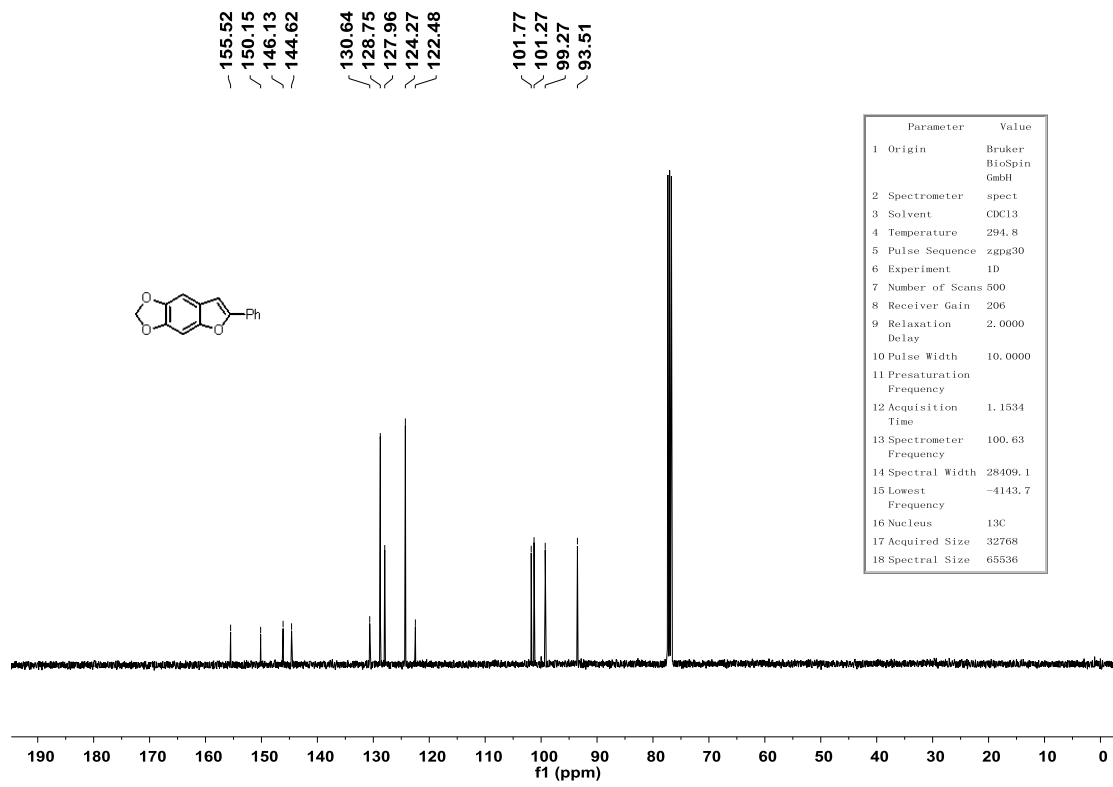

7a

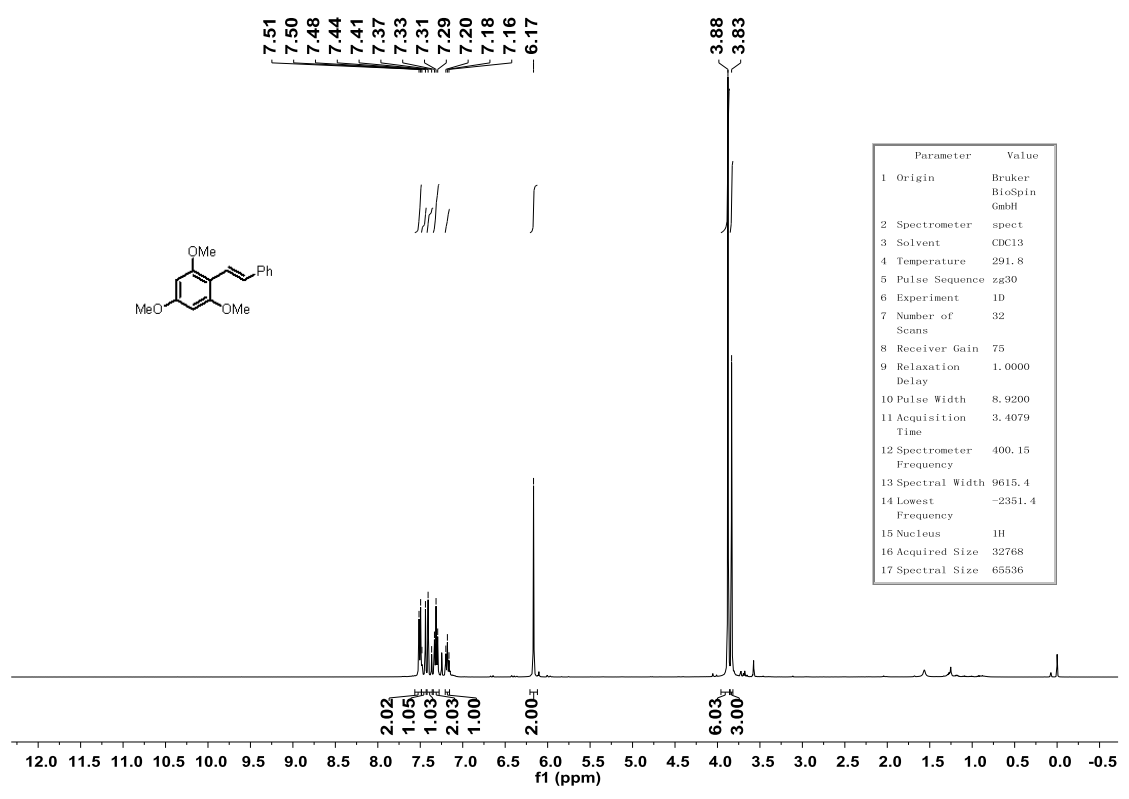



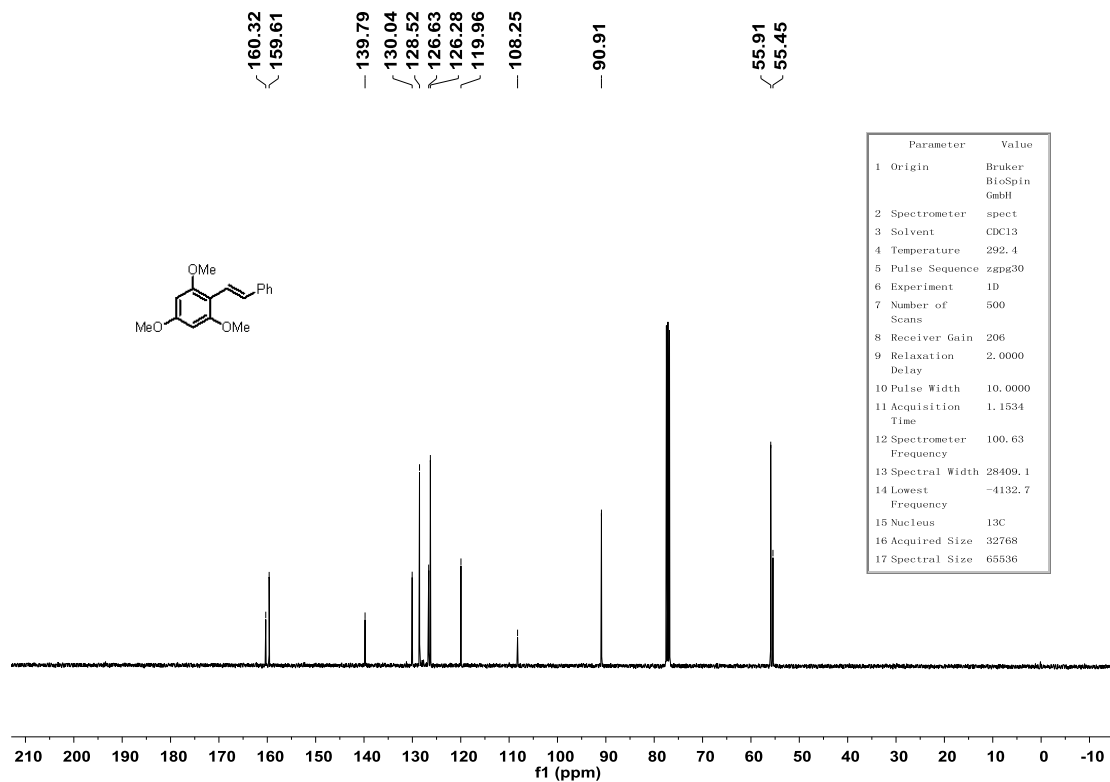

7b

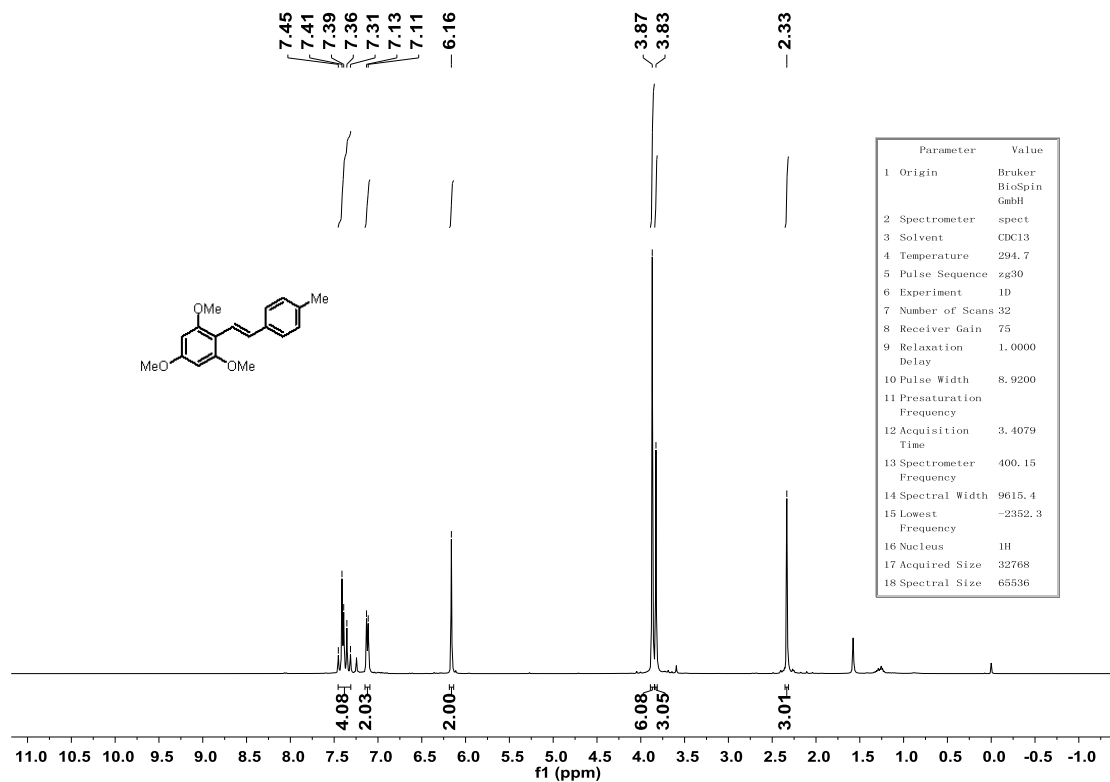

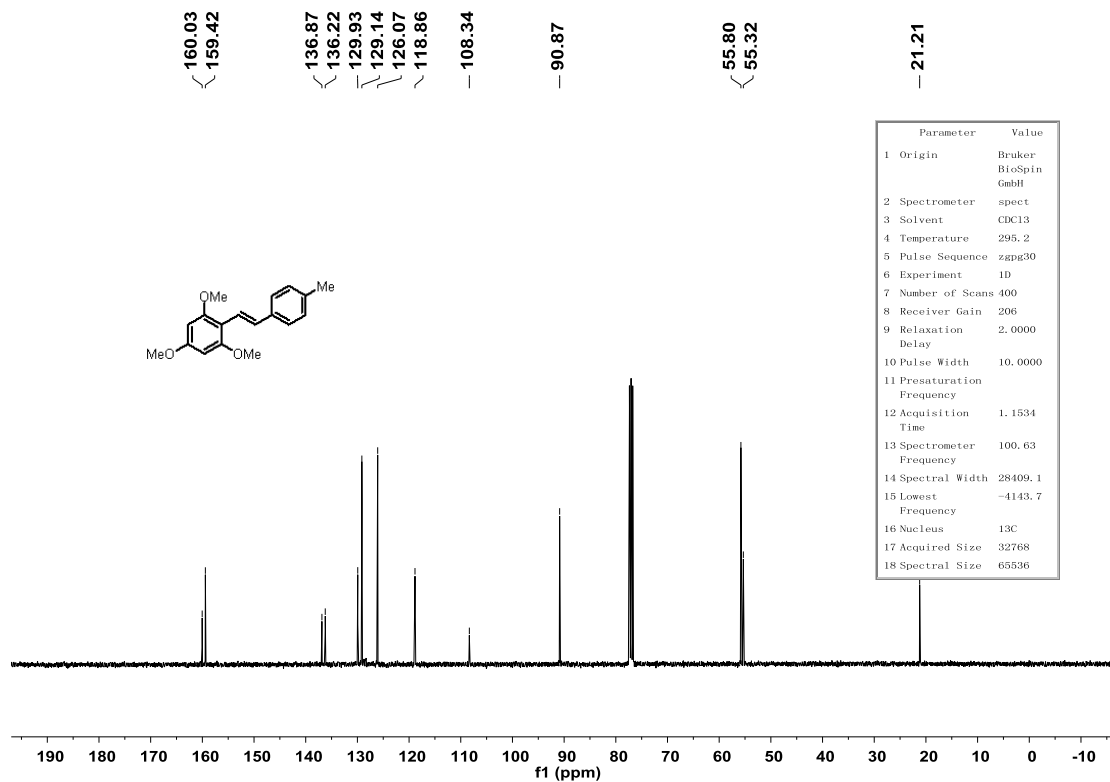

7c

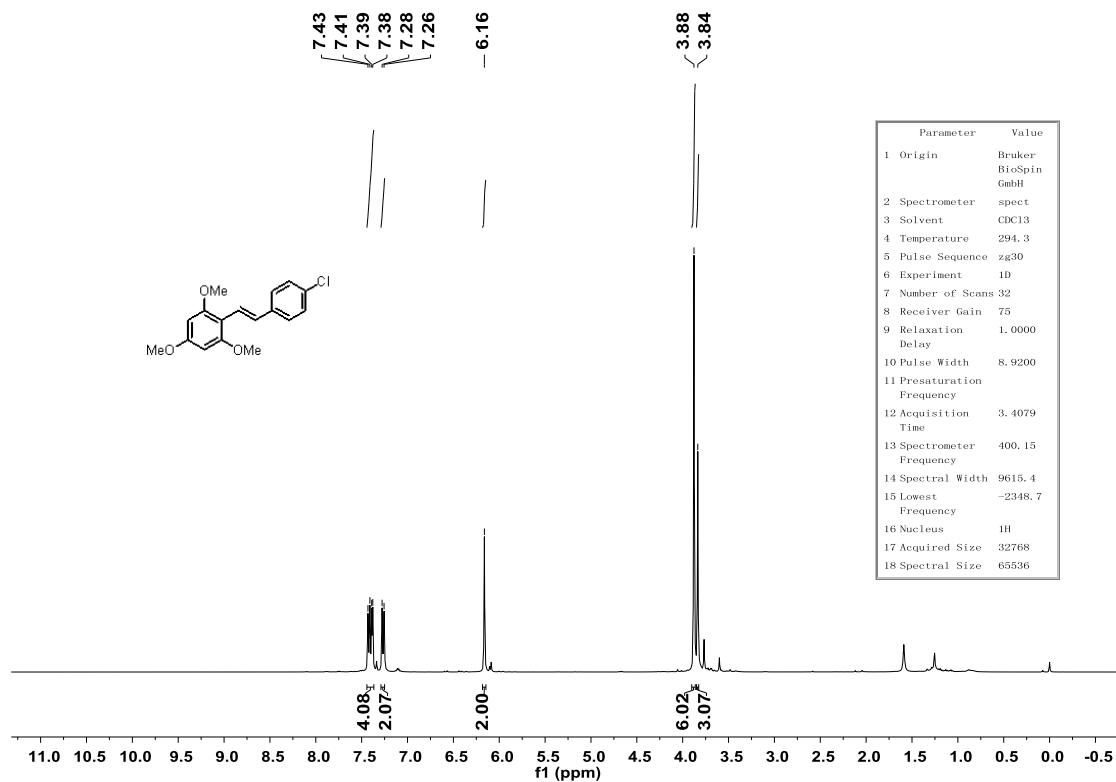

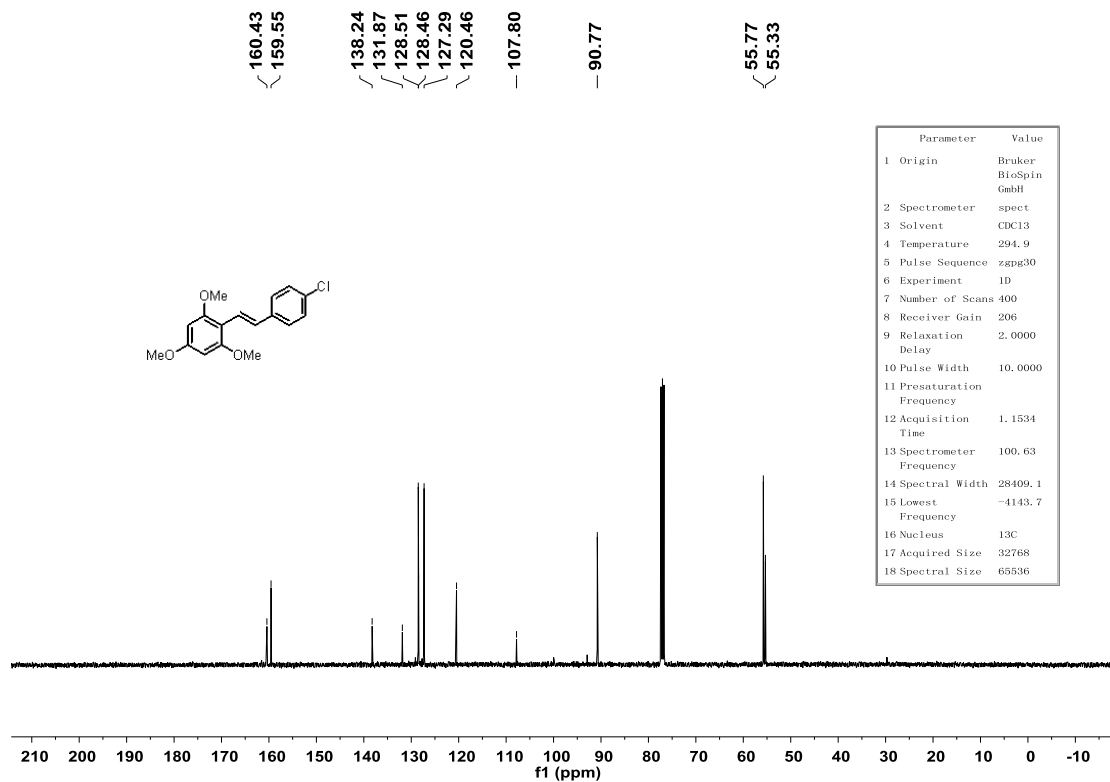

7d

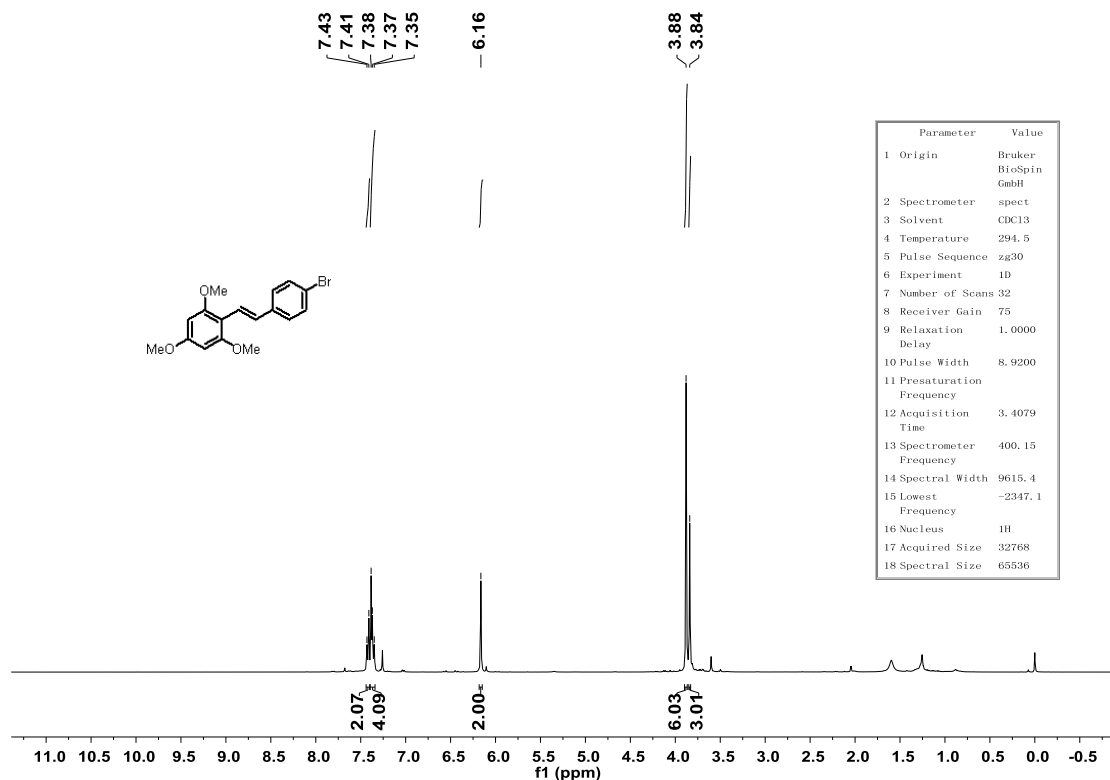

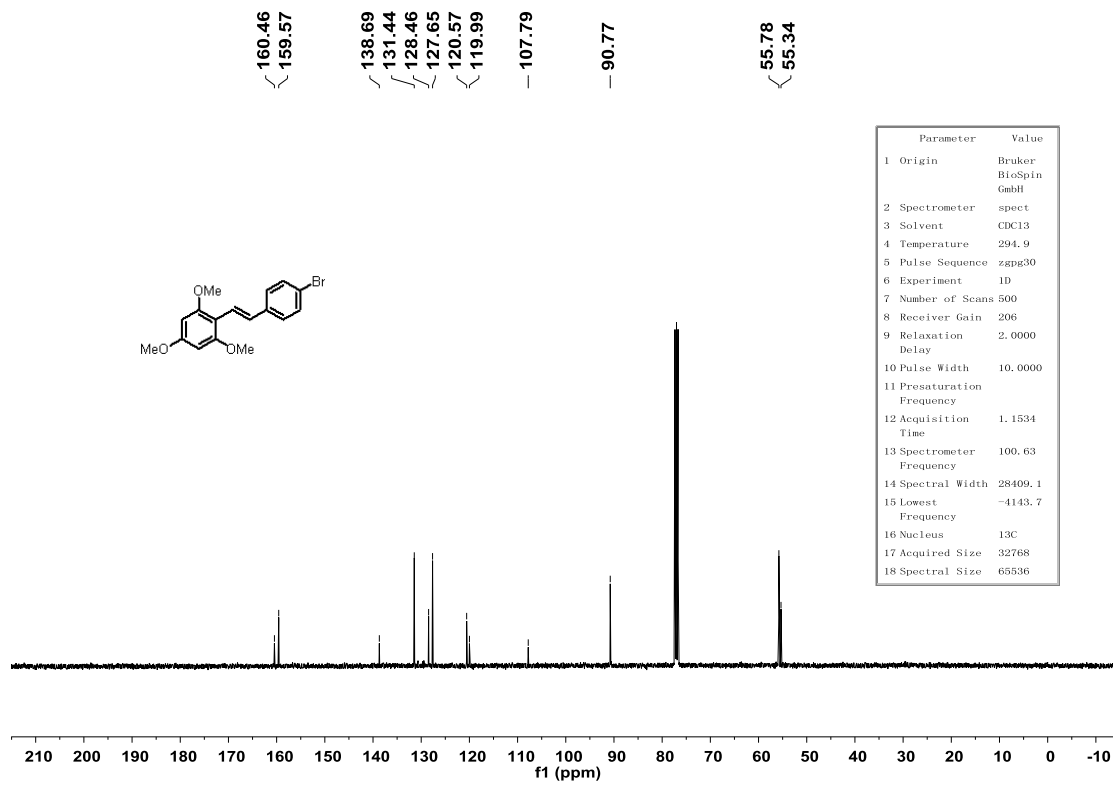

Supplement: d1cc04000f1.pdf [file d1cc04000f1.pdf]
